# Supplementary material for: Cannabinol (CBN; 30 and 300 mg) effects on sleep and next-day function in insomnia disorder (‘CUPID’ study): protocol for a randomised, double-blind, placebo-controlled, cross-over, three-arm, proof-of-concept trial
Source: PubMed Central journal article supplement — BMJ Open. 2023 Aug 23;13(8):e071148. doi: 10.1136/bmjopen-2022-071148 (PMC10450062; doi:10.1136/bmjopen-2022-071148), 2023-08-23
Supplement: bmjopen-2022-071148.draft_revisions.pdf [file bmjopen-2022-071148.draft_revisions.pdf]

# BMJ Open

BMJ Open is committed to open peer review. As part of this commitment we make the peer review history of every article we publish publicly available.

When an article is published we post the peer reviewers' comments and the authors' responses online. We also post the versions of the paper that were used during peer review. These are the versions that the peer review comments apply to.

The versions of the paper that follow are the versions that were submitted during the peer review process. They are not the versions of record or the final published versions. They should not be cited or distributed as the published version of this manuscript.

BMJ Open is an open access journal and the full, final, typeset and author-corrected version of record of the manuscript is available on our site with no access controls, subscription charges or pay-per-view fees (<http://bmjopen.bmj.com>).

If you have any questions on BMJ Open's open peer review process please email [info.bmjopen@bmj.com](mailto:info.bmjopen@bmj.com)

# BMJ Open

**Cannabinol (CBN; 30 and 300 mg) effects on sleep and next-day function in insomnia disorder ('CUPID' study): Protocol for a randomised, double-blind, placebo-controlled, crossover, three-arm, proof-of-concept trial.**

|                               |                                                                                                                                                                                                                                                                                                                                                                                                                                                                                                                                                                                                                                                                                                                                                                                                                                                                                                                                                                                                                                                                                                                                                                                                                                                                                                                                                                                                                                                                                                                                                                                                                                                                                                                                                                                                                                                                                       |
|-------------------------------|---------------------------------------------------------------------------------------------------------------------------------------------------------------------------------------------------------------------------------------------------------------------------------------------------------------------------------------------------------------------------------------------------------------------------------------------------------------------------------------------------------------------------------------------------------------------------------------------------------------------------------------------------------------------------------------------------------------------------------------------------------------------------------------------------------------------------------------------------------------------------------------------------------------------------------------------------------------------------------------------------------------------------------------------------------------------------------------------------------------------------------------------------------------------------------------------------------------------------------------------------------------------------------------------------------------------------------------------------------------------------------------------------------------------------------------------------------------------------------------------------------------------------------------------------------------------------------------------------------------------------------------------------------------------------------------------------------------------------------------------------------------------------------------------------------------------------------------------------------------------------------------|
| Journal:                      | <i>BMJ Open</i>                                                                                                                                                                                                                                                                                                                                                                                                                                                                                                                                                                                                                                                                                                                                                                                                                                                                                                                                                                                                                                                                                                                                                                                                                                                                                                                                                                                                                                                                                                                                                                                                                                                                                                                                                                                                                                                                       |
| Manuscript ID                 | bmjopen-2022-071148                                                                                                                                                                                                                                                                                                                                                                                                                                                                                                                                                                                                                                                                                                                                                                                                                                                                                                                                                                                                                                                                                                                                                                                                                                                                                                                                                                                                                                                                                                                                                                                                                                                                                                                                                                                                                                                                   |
| Article Type:                 | Protocol                                                                                                                                                                                                                                                                                                                                                                                                                                                                                                                                                                                                                                                                                                                                                                                                                                                                                                                                                                                                                                                                                                                                                                                                                                                                                                                                                                                                                                                                                                                                                                                                                                                                                                                                                                                                                                                                              |
| Date Submitted by the Author: | 21-Dec-2022                                                                                                                                                                                                                                                                                                                                                                                                                                                                                                                                                                                                                                                                                                                                                                                                                                                                                                                                                                                                                                                                                                                                                                                                                                                                                                                                                                                                                                                                                                                                                                                                                                                                                                                                                                                                                                                                           |
| Complete List of Authors:     | <p>Lavender, Isobel; Woolcock Institute of Medical Research, Sleep and Circadian Research Group; The University of Sydney Lambert Initiative for Cannabinoid Therapeutics,<br/>         McCartney, Danielle; Woolcock Institute of Medical Research, Centre for Sleep and Chronobiology; The University of Sydney, Lambert Initiative for Cannabinoid Therapeutics, Brain and Mind Centre<br/>         Marshall, Nathaniel; Woolcock Institute of Medical Research, Centre for Sleep and Chronobiology<br/>         Suraev, Anastasia; Woolcock Institute of Medical Research, Centre for Sleep and Chronobiology; The University of Sydney Lambert Initiative for Cannabinoid Therapeutics,<br/>         Irwin, Chris; Griffith University, Menzies Health Institute Queensland, School Allied Health Sciences<br/>         D'Rozario, Angela; Woolcock Institute of Medical Research, Centre for Sleep and Chronobiology; The University of Sydney, Faculty of Science, School of Psychology<br/>         Gordon, Christopher J.; Woolcock Institute of Medical Research, Centre for Sleep and Chronobiology; The University of Sydney Susan Wakil School of Nursing and Midwifery<br/>         Saini, Bandana; Woolcock Institute of Medical Research, Centre for Sleep and Chronobiology<br/>         Grunstein, R; Woolcock Institute of Medical Research, Centre for Sleep and Chronobiology; Royal Prince Alfred Hospital<br/>         Yee, Brendon; Woolcock Institute of Medical Research, Centre for Sleep and Chronobiology; Royal Prince Alfred Hospital<br/>         McGregor, Iain; The University of Sydney Lambert Initiative for Cannabinoid Therapeutics, ; The University of Sydney Brain and Mind Centre<br/>         Hoyos, C. M.; Woolcock Institute of Medical Research, Centre for Sleep and Chronobiology; The University of Sydney School of Psychology</p> |
| Keywords:                     | SLEEP MEDICINE, STATISTICS & RESEARCH METHODS, Clinical trials < THERAPEUTICS                                                                                                                                                                                                                                                                                                                                                                                                                                                                                                                                                                                                                                                                                                                                                                                                                                                                                                                                                                                                                                                                                                                                                                                                                                                                                                                                                                                                                                                                                                                                                                                                                                                                                                                                                                                                         |
|                               |                                                                                                                                                                                                                                                                                                                                                                                                                                                                                                                                                                                                                                                                                                                                                                                                                                                                                                                                                                                                                                                                                                                                                                                                                                                                                                                                                                                                                                                                                                                                                                                                                                                                                                                                                                                                                                                                                       |

1  
2  
3  
4  
5  
6  
7  
8  
9  
10  
11  
12  
13  
14  
15  
16  
17  
18  
19  
20  
21  
22  
23  
24  
25  
26  
27  
28  
29  
30  
31  
32  
33  
34  
35  
36  
37  
38  
39  
40  
41  
42  
43  
44  
45  
46  
47  
48  
49  
50  
51  
52  
53  
54  
55  
56  
57  
58  
59  
60

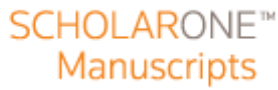

1  
2  
3 1 **Cannabinol (CBN; 30 and 300 mg) effects on sleep and next-day function in insomnia disorder**  
4 2 **(‘CUPID’ study): Protocol for a randomised, double-blind, placebo-controlled, crossover, three-**  
5 3 **arm, proof-of-concept trial.**  
6 4

7 5 Isobel Lavender<sup>1,2,3,4</sup>

8 6 Danielle McCartney<sup>1,2,3,4</sup>

9 7 Nathaniel S Marshall<sup>1</sup>

10 8 Anastasia Suraev<sup>1,2,3,4</sup>

11 9 Chris Irwin<sup>7</sup>

12 10 Angela L D'Rozario<sup>1,3,4</sup>

13 11 Christopher Gordon<sup>1,8</sup>

14 12 Bandana Saini<sup>1</sup>

15 13 Ronald R Grunstein<sup>1,5,6</sup>

16 14 Brendon J Yee<sup>1,5,6</sup>

17 15 Iain S McGregor<sup>2,3,4</sup>

18 16 Camilla M Hoyos<sup>1,3,4</sup>

19 17  
20 18 <sup>1</sup>Centre for Sleep and Chronobiology, Woolcock Institute of Medical Research, University of Sydney,  
21 19 Sydney, New South Wales, Australia

22 20 <sup>2</sup>Lambert Initiative for Cannabinoid Therapeutics, The University of Sydney, Sydney, New South  
23 21 Wales, Australia

24 22 <sup>3</sup>Brain and Mind Centre, The University of Sydney, Sydney, New South Wales, Australia

25 23 <sup>4</sup>Faculty of Science, School of Psychology, The University of Sydney, Sydney, New South Wales,  
26 24 Australia

27 25 <sup>5</sup>Royal Prince Alfred Hospital, Sydney, New South Wales, Australia

28 26 <sup>6</sup>University of Sydney, Faculty of Medicine and Health, Central Clinical School, New South Wales,  
29 27 Australia

30 28 <sup>7</sup>School of Health Sciences and Social Work, Menzies Health Institute Queensland, Griffith  
31 29 University, Gold Coast, Queensland, Australia

32 30 <sup>8</sup>Susan Wakil School of Nursing and Midwifery, University of Sydney, New South Wales, Australia

33 31  
34 32 **Ethics and dissemination:** Human Research Ethics Committee approval has been granted by Bellberry  
35 33 Limited (2021-08-907). Study findings will be disseminated in a peer-reviewed open-access journal  
36 34 and at academic conferences.  
37 35

38 36 **ClinicalTrials.gov Identifier:** NCT05344170  
39 37

40 38 **Correspondence**

41 39 Dr Camilla Hoyos, Woolcock Institute of Medical Research, Sydney, New South Wales, Australia.

42 40 Email: [camilla.hoyos@sydney.edu.au](mailto:camilla.hoyos@sydney.edu.au)  
43 41

44 42 **Word count:** 4666  
45 43  
46  
47  
48  
49  
50  
51  
52  
53  
54  
55  
56  
57  
58  
59  
60

**Abstract** (258/300 words)

**Objective:** Insomnia is the most prevalent sleep disorder with few effective pharmacotherapies. Recent preclinical studies, as well as anecdotal evidence in humans, suggests that cannabiniol (CBN), a cannabinoid formed through oxidation of delta-9-tetrahydrocannabinol (THC), has potential as an intervention for insomnia disorder. Despite this, the effects of CBN, in isolation, on sleep have yet to be systematically studied in humans. **Methods:** The present randomised, double-blind, placebo-controlled, single-dose, three-arm, crossover, proof-of-concept study investigates CBN effects on sleep and next-day function in twenty participants with clinician diagnosed insomnia disorder and Insomnia Severity Index [ISI] Score  $\geq 15$ . Participants will receive a single fixed oral liquid dose of 30 mg CBN ('ECS310' 1.5%), 300 mg CBN ('ECS310' 15%), and matched placebo, in random order on three treatment nights each separated by a two-week washout period. Participants will undergo overnight sleep assessment using in-laboratory polysomnography (PSG) and next-day neurobehavioral function tests. The primary outcome of the study is wake after sleep onset (WASO) in minutes measured using PSG, compared to placebo. Secondary outcomes include changes to traditional sleep staging, sleep onset latency, and absolute spectral power during non-rapid eye movement (NREM) sleep. Tertiary outcomes include changes to sleep spindles during NREM sleep, arousal indices, absolute spectral power during rapid eye movement (REM) sleep, and subjective sleep quality. Safety-related and exploratory outcomes include changes to next day driving performance, alertness and reaction time, overnight memory consolidation, subjective drug effects, mood, postural balance, subjective and objective sleepiness, and plasma, urinary, and salivary cannabinoid concentrations. The study will provide novel preliminary data on CBN safety and efficacy in insomnia disorder, which may inform larger clinical trials in the future. ClinicalTrials.gov Identifier: NCT05344170.

**Key words:** Power Spectral Analysis; Resting Wake Electroencephalography; Psychomotor Vigilance Test; Karolinska Drowsiness Test; Karolinska Sleepiness Scale; Leeds Sleep Evaluation Questionnaire; Standard Deviation of Lateral Position; Liquid chromatography–Mass Spectrometry.

**Strengths and limitations of the study**

- This is the first clinical study to investigate the effects of CBN isolate on sleep using gold-standard objective measures, validated subjective measures, and rigorous design methodology.
- We will test two active doses (30 and 300 mg CBN) that have been guided by preclinical data and CBN product marketing/consumer testimony.
- Study participants will have clinician-diagnosed insomnia disorder and will undergo extensive screening, including an overnight diagnostic sleep study (PSG), to rule out other sleep disorders that commonly co-occur with insomnia.
- Carry-over effects may occur between study conditions. A recent crossover study demonstrated oral cannabinoids can persist in plasma for >4 weeks (at 1500 mg doses); [1] however, our washout period (2-weeks) was chosen to minimise participant burden (participants cannot undergo insomnia treatment before [3-months] or during [~2 months] the study).
- The study is a single-dose in-laboratory proof-of-concept design. Results may, therefore, lack ecological validity. Repeated CBN dosing may be necessary to effectively treat insomnia.

## Background

Insomnia disorder is characterised by unwelcome subjective difficulty falling asleep, maintaining sleep, and/or achieving restorative sleep – where symptoms persist for 3-months and are accompanied by daytime sequelae of dysfunction and/or distress.[2] Insomnia disorder is the most prevalent sleep disorder which affects between 10–30% of adults[3] and persists in 37% of cases at 5-year follow-up.[4] Insomnia disorder increases risk of mental and physical illness, notably depression [5] and dementia [6]. The economic burden of insomnia disorder is estimated at >\$13 billion per annum in Australia.[7]

Insomnia disorder treatments are typically behavioral or pharmacological in nature. Cognitive behavioural therapy for insomnia (CBTi) is the first-line treatment, the efficacy of which is confirmed in recent meta-analyses. [8] Nevertheless, significant barriers to CBTi access exist including limited providers, high cost,[9] and delayed perception of subjective benefits, with treatment adherence essential to attain desired outcomes.[10] CBTi may also be less effective in individuals with short sleep duration (i.e., <6 hours/night).[11] As such, sedative-hypnotics are commonly used in primary care.[8] While effective in the short-term, well-documented side effects include daytime sedation, psychomotor impairment, addiction/dependence, and premature mortality.[12] Therefore, there exists a clear need for safe pharmacological insomnia disorder treatments.

*Cannabis sativa* is a complex plant containing numerous potentially therapeutic chemical compounds, including over 140 constituent ‘cannabinoids’.[13] As historical legal prohibitions against cannabis are relaxed, cannabinoids are increasingly used to aid sleep.[14] The best-researched cannabinoids are  $\Delta^9$ -tetrahydrocannabinol (THC) and cannabidiol (CBD); however, in recent times, *cannabinol* (CBN) has become recognized as a putative ‘sleep-enhancing’ cannabinoid.[15] CBN is produced via the nonenzymatic oxidation of THC and is therefore present at higher concentrations in aged (rather than ‘young’) cannabis plant material.[16] This is significant as aged cannabis plant material is anecdotally reported to induce sleep.[17] CBN products are also being sold as sleep aids in unregulated markets; [18] however, a recent narrative review of CBN highlighted insufficient evidence to support sleep-related claims, despite a plausible mechanism of action described below.

THC and CBN exert some of their physiological effects via interactions with the *endogenous cannabinoid system* (ECS):[13] comprising of signaling molecules termed ‘*endocannabinoids*’ (e.g., anandamide, 2-Arachidonoylglycerol [2-AG]), their receptors, and enzymes.[19, 20] The ECS is involved in regulating myriad biological processes, including circadian rhythmicity[21] and systematic administration of anandamide has been shown to promote sleep in rodents and humans [19, 22, 23] via activation of the cannabinoid receptor 1 (CB<sub>1</sub>R).[22, 24] As such, the CB<sub>1</sub>R is considered a promising therapeutic target.[25] The pharmacological effects of THC occur via partial agonism at CB<sub>1</sub>R[26] and can include intoxication, sedation and changes in sleep architecture.[19]. CBN also has agonist actions at CB<sub>1</sub>R, albeit approximately 10-times less potent than THC[26], which may potentially account for the low levels of intoxication reported in historic CBN studies. This lack of intoxication potentially renders CBN a more practical and safer alternative to THC as a sleep aid.[27]

Recent preclinical (unpublished) research generated by the Lambert Initiative for Cannabinoid Therapeutics has investigated the effects of CBN isolate on sleep. Long-Evans rats with implanted electrodes were administered CBN (10, 30, and 300 mg/kg intraperitoneally) or a positive control (Zolpidem). CBN (10 mg/kg) initially decreased rapid eye movement (REM) sleep quantity; however, 4 hours after administration, a significant increase in the percentage of REM and non-REM (NREM) sleep occurred. In a follow-up chronic dosing study, the delayed effects on sleep followed a similar

1 pattern to plasma concentrations of CBN metabolites (11-OH-CBN and 11-COOH-CBN) which target  
2 CB<sub>1</sub>R with greater affinity than CBN.[28] These delayed effects suggest that CBN and its metabolites  
3 could reduce wake after sleep onset (WASO).  
4

5 Two recent clinical studies have administered small quantities of CBN as a component of multi-  
6 cannabinoid formulations.[29, 30] A crossover randomized controlled trial (RCT), with a one-week  
7 washout, investigated two-weeks of an oral liquid containing 20 mg THC, 2 mg CBN, and 1 mg CBD  
8 in 20 adults with insomnia disorder. The drug significantly improved insomnia disorder symptoms  
9 (Insomnia Severity Index [ISI] -5.1 points,  $p=0.0001$ ,  $d=0.94$ ) compared to placebo, with no significant  
10 changes to polysomnography (PSG).[29] In an interventional open-label study, current medicinal  
11 cannabis users with self-report sleep difficulty reported improved sleep (assessed via an unvalidated  
12 subjective survey and a validated non-contact at-home tracking device) after three weeks of nightly  
13 administration of an oral capsule containing 10 mg THC and 5 mg CBN.[30] The effects of CBN  
14 cannot be deconvoluted from those of THC in these studies. We are not aware of any studies to-date  
15 that have tested the effects of CBN isolate on objectively measured human sleep.  
16

### 17 Study design and aim

18 Using a randomised, double-blind, placebo-controlled, three-arm, crossover, single-site, proof-of-  
19 concept study design, we will investigate the acute effects of oral dose CBN on sleep and next-day  
20 function in 20 participants with clinician-diagnosed insomnia disorder. The primary study aim is to  
21 investigate the effects of CBN (30 and 300 mg) versus placebo on sleep in insomnia disorder. The study  
22 will indicate the safety and feasibility of CBN as a pharmacological therapy and generate preliminary  
23 data to inform larger clinical trials. Many outcome measures used in insomnia disorder clinical trials  
24 are known to be susceptible to placebo effects. A placebo control is scientifically and ethically  
25 defensible choice as effects of CBN on human sleep are unknown and could not be properly elucidated  
26 if an active treatment such as Zolpidem was the comparator rather than placebo.  
27

### 28 Study outcomes

29 The primary study outcome is WASO minutes measured using in-laboratory overnight PSG from lights  
30 out until the last epoch scored as any stage of sleep by an experienced polysomnographic technician in  
31 accordance with American Academy of Sleep Medicine (AASM) 2015 Sleep Scoring criteria (Version  
32 2.2).[31] Additional study outcomes are as follows (see ClinicalTrials.gov Identifier: NCT05344170):

- 33 1. Secondary outcomes include changes to sleep microarchitecture, sleep onset latency (SOL)  
34 minutes, and absolute spectral power during NREM sleep, measured using in-laboratory PSG.
- 35 2. Tertiary outcomes include sleep spindle events during NREM sleep, arousal indices, absolute  
36 spectral power during REM sleep, and subjective sleep quality.
- 37 3. Safety outcomes include assessment of next day neurobehavioral function (subjective drug  
38 effects, mood, memory, alertness, resting electroencephalography (EEG) power after sleep,  
39 reaction time, simulated driving performance, and postural sway).
- 40 4. Exploratory outcomes will include plasma, urinary, and cannabinoid concentrations, as well  
41 resting EEG power before sleep.  
42



## Safety

The investigational product, CBN, is currently a Schedule 9 ‘Prohibited Substance’ in Australia.[32] The safety profile of CBN can be inferred from a number of human studies conducted between the 1970-90’s. These studies explored oral dose ranges up to 1200 mg CBN isolate and some involved repeated daily dosing with CBD for up to 4 weeks.[33-36] There were no notable safety concerns, aberrations or toxicity concerns from any of these studies, with no adverse changes in parameters such as heart rate, blood pressure, body temperature, respiratory rate, perception, intoxication and postural stability.[33-36] None of the studies reported effects on sleep or sedation, and residual next-day effects of CBN (such as adverse effects on driving performance and cognitive function) are also unknown and will be explored in the current study. CBN is currently being investigated as an analgesic agent (ClinicalTrials.gov Identifier NCT03675971) and topical treatment for epidermolysis bullosa (ClinicalTrials.gov Identifier: NCT04908215) in ongoing clinical trials. We will monitor and review safety reports from these trials as they become available.

## **Methods**

### **Participants, interventions, and outcomes**

#### Trial setting

The trial Sponsor and site is the Woolcock Institute of Medical Research, a specialist sleep and respiratory research institute and clinic (Sydney, Australia). The study funder is the Lambert Initiative for Cannabinoid Therapeutics, University of Sydney (Sydney, Australia), a philanthropically funded centre for cannabinoid science. Recruitment commenced in August 2022 and is planned to continue for 1.5 years. The first participant was randomised on the 13<sup>th</sup> of October 2022. The study received Bellberry Limited Human Research Ethics Committee (2021-08-907; Version 2.1, 01-Aug-2022) approval and is registered on ClinicalTrials.gov (Identifier: NCT05344170; 25-April-2022). The clinical trial protocol is available from the first author on request. Significant changes to the study protocol will be documented on ClinicalTrials.gov. The study protocol was developed according to the Standard Protocol Items: Recommendations for Interventional Trials (SPIRIT) 2013 statement.[37] The Therapeutics Goods Administration (TGA) has acknowledged the use of CBN in this study through the Clinical Trial Notification (CTN) scheme (CTN Number: C T-2022-CTN-00543-1). The study investigators have led the design and conduct of this trial, will conduct the analyses, and make all publication decisions.

#### Participant eligibility

Eligible participants will be aged between 25-65 years with physician diagnosed insomnia disorder as per the International Classification of Sleep Disorders-3 (ICSD-3)[38] and Diagnostic and Statistical Manual of Mental Disorders, Fifth Edition (DSM-5)[39] criteria as determined by the study physician (see Box 1). The age range was selected to minimise age-related changes to sleep architecture.[40] As cannabinoids have been shown to improve symptoms (e.g., anxiety, pain) that commonly impair sleep (i.e., causing ‘secondary’ insomnia disorder),[41] a ‘primary’ insomnia disorder population is being recruited for this study.



**Box 1****Inclusion and exclusion criteria for study participants**

Eligible individuals must fulfill the following criteria:

1. Between 25 – 65 years of age
2. Insomnia Severity Index (ISI) score  $\geq 15$  at the point of eligibility screening
3. Insomnia disorder (symptoms occurring at least 3 times per week and present for longer than 3 months) as determined by the study physician
4. Ability to take oral medication
5. Provision of signed and dated informed consent form
6. Stated willingness to comply with all study procedures and availability for the duration of the study

Individuals who meet any of the following criteria will be ineligible to participate in the study:

1. Medical condition or medication that is the cause of the insomnia disorder as determined by the study physician
2. Known hypersensitivity to cannabis or cannabinoid products (including if this becomes evident during the trial)
3. Reported use of cannabis or cannabinoid products within the past 3 months as confirmed by at least one negative urine drug screen (UDS) (or at the study physician's discretion)
4. Sleep apnoea (defined as Apnoea Hypopnea Index [AHI]  $>15$  and Oxygen Desaturation Index [ODI] $>10$ ) as confirmed by polysomnography (PSG) at screening
5. Sleep-related movement disorder as determined by the study physician
6. Delayed or advanced sleep phase syndrome (based on actigraphy and sleep diary) as confirmed screening
7. Any medical condition that produces an abnormal EEG (i.e., epilepsy, brain injury)
8. Clinically relevant cardiovascular abnormalities as determined by the study physician and a 12-lead electrocardiogram (ECG) at screening
9. Shift work or trans meridian travel (two time zones) within the last month
10. History of major psychiatric disorder in the past 12 months at the study physician's discretion, except clinically managed mild depression and/or anxiety
11. History of suicide attempt or current suicide ideation (score greater than 1 on Q9 of the Patient Health Questionnaire [PHQ-9])[42]
12. Pregnancy or lactating. All female volunteers will be required to complete a urine pregnancy test at screening and instructed to use a reliable form of contraception while participating in the project
13. History of drug or alcohol dependency or abuse within approximately the past 2 years
14. Use of CNS-active drugs (cannabis, amphetamines, cocaine, antidepressants, opioids, benzodiazepines) in the past 3 months as confirmed by a positive urine drug test at screening or at the study physician's discretion
15. Use of medications that may have a clinically significant impact upon the metabolism and excretion of cannabinoids as determined by the study physician (e.g., CYP450 enzyme inducers/inhibitors)
16. Excessive caffeine use that in the opinion of the study physician contributes to the participant's insomnia disorder, or the inability to abstain from caffeine use 24 hours prior to each overnight sleep study
17. Inability to refrain from alcohol consumption 24 hours prior to each overnight sleep study
18. Individuals with nicotine dependence (i.e., daily smokers)
19. Medical conditions that result in frequent need to get out of bed (e.g., sleep walking, nocturia)

20. Psychological or behavioural treatment for insomnia disorder, including cognitive behavioural therapy for insomnia, within 3 months before screening (excluding sleep hygiene advice)
21. Occupational or judicially ordered drug screening
22. Has held an unrestricted driving license <1 year
23. Cannot speak English fluently

## Patient and Public Involvement

Patients and/or the public were not involved in the design, conduct, reporting or dissemination plans of this research.

## Intervention

### Study doses

Participants will receive a single fixed 2 mL oral dose of: (1) 30 mg CBN ('ECS310' 1.5% containing 15 mg/mL CBN); (2) 300 mg CBN ('ECS310' 15% containing 150 mg/mL CBN); and (3) matched placebo across three separate overnight Treatment Sessions, in randomised order, two-hours prior to habitual sleep time. The lower dose was selected to match the CBN products available in the United States and supported by customer testimonies.[18] The higher dose was informed by unpublished preclinical research generated by the Lambert Initiative for Cannabinoid Therapeutics using interspecies scaling calculations.

### Investigational product

The investigational drug ('ECS310') is a liquid formulation of CBN suspended in medium chain triglycerides (MCT) oil. The placebo contains excipient MCT oil only. The maximum detectable THC content of the active investigational products will be  $\leq 150 \mu\text{g}$ . Neither of the study drugs nor matched placebo will contain any other cannabinoids, minor cannabinoids or terpenes/terpenoids. The study drug and matched placebo are expected to be identical in their visual appearance, taste, and smell. The MCT oil contains paprika oleoresin colorant to ensure the double-blind is maintained. The Sponsor purchased the investigational product from BOD Australia, who sourced investigational products from Medropharm, Switzerland.

### Recruitment and retention

We aim to recruit 20 participants over an 18-month period. The sample size has been determined arbitrarily as the trial is of pilot nature. Participants will be recruited from the Woolcock Institute Volunteer Database, social media, and locally displayed physical study advertisements. Specialised participant recruitment services may be used where necessary. Participants will be reimbursed a fixed amount equivalent to that used in previous clinical trials with similar participant involvement and loss of working hours.[43] To encourage retention, participants will receive reimbursement upon completion of the final Treatment Session. Study advertisements will include an embedded link and QR code to the study website (described below).

### Eligibility screening

Eligibility assessment will be performed in three steps undertaken by the study team at the Woolcock Institute of Medical Research (see Figure 1 *Study Flow Diagram*):

1. *On-line and telephone pre-screening.* Interested individuals will be directed to the study webpage. They will provide electronic consent before completing an online pre-screening questionnaire to assess initial eligibility (e.g., age, location, ISI score, trans meridian travel, shift work). Potentially suitable individuals will be invited to provide contact details and

- provided with the Participant Information Statement so that the trial coordinator may conduct a brief telephone interview before scheduling screening appointments. Individuals deemed unsuitable will be provided with support resources.
2. *Screening visit 1.* Willing and potentially suitable participants will attend an on-site medical screening. The study physician will obtain written informed consent before conducting a screening interview to compile medical history, assess suitability against study eligibility criteria (Box 1), and diagnose insomnia disorder (ICSD-3[38] and DSM-V[39]). The following validated self-report questionnaires will be used to evaluate eligibility: ISI,[44] a measure of insomnia disorder symptom severity over the past two-weeks; Epworth Sleepiness Scale (ESS),[45] a measure of sleep propensity in daily life; Hospital Anxiety and Depression Scale (HADS),[46] a measure of anxiety and depression; and, the Patient Health Questionnaire-9 (PHQ-9),[42] an instrument for screening and monitoring the severity of depression and suicidal ideation. An electrocardiogram (ECG) and urinary screen (pregnancy and recent alcohol, cannabis, cocaine, benzodiazepines, opiates, or amphetamines, use) will also be conducted.
  3. *Screening visit 2.* Participants will be required to complete a clinical overnight PSG sleep study to rule out the presence of other sleep disorders (obstructive sleep apnoea or sleep-related movement disorder, see Box 1). Diagnostic PSG results within the previous 12-months may be used where weight has not changed substantially in that time (at discretion of the Study). Diagnostic sleep studies will be scored by an experienced sleep technician[31] and reviewed by the study physician.

Insert Figure 1 here

**Figure 1.** *Study flow diagram*

### **Randomisation, allocation concealment, and blinding**

Participants are being allocated to one of six possible treatment orders in a 1:1:1:1:1:1 ratio using a pre-populated randomisation schedule generated by the study epidemiologist (NSM). The six-orders will constitute a balanced Latin square. Sequences will be computer-generated and stored in a password-protected system inaccessible to blinded study personnel (centralised computerised randomisation). Allocation concealment will be managed by the unblinded study epidemiologist and an independent staff member who will not have any contact with participants, nor involvement in day-to-day trial activities. A study physician may request the study epidemiologist be unblinded in the event of a medical emergency. Participants who are enrolled in the study, but not yet randomised, will be assigned a unique screening number. Randomisation will occur at the outset of the first Treatment Session assuming eligibility persists. Working under the study physician, the trial coordinator will record the decision to randomise the patient. The study database will then issue an irrevocable randomisation number for that participant. Investigational product is stored in opaque, sequentially numbered containers labelled with the patient randomisation number and dose to be administered at each Treatment Session to maintain blinding of all patients, staff, and outcome assessors. The drug manufacturer packaged and labelled the investigational product according to the randomisation list generated by the study epidemiologist.

### **Pre-Treatment Session procedures**

Participants are asked to maintain a regular sleep-wake schedule for one week prior to each Treatment Session. To confirm this, participants wear a wrist-worn actigraphy monitor (GENEActive, Activinsights, United Kingdom) and complete a daily sleep diary (Karolinska Sleep Diary [KSS])[47]

1 throughout this period. Participants are required to abstain from consuming cannabis, cannabinoids, and  
2 other drugs throughout the entire study; and avoid alcohol and caffeine 24 hours prior to Treatment  
3 Sessions. Urinary drug, alcohol (DrugCheck NxStep OnSite, USA) and pregnancy (SureStep,  
4 Germany) screening occurs at the outset of each Treatment Session.  
5

### 6 **Treatment Session procedures**

7 Participants arrive at the Woolcock Sleep Clinic in the early evening (~17:00-18:00, depending on  
8 habitual lights out), where they remain until late morning (~11:00) the following day, as per the  
9 Treatment Session schedule in Figure 2. Standardised meals are provided. All Treatment Sessions are  
10 separated by a washout period of approximately 2-weeks, to mitigate carry-over effects between  
11 doses.[1]  
12

### 13 Study drug administration

14 After a brief medical examination, the study physician prescribes and dispenses the study drug, drawing  
15 a fixed 2 mL volume of solution into a pre-labelled amber plastic syringe. Participants are administered  
16 the randomly allocated study drug approximately 2-hours prior to habitual bedtime. The trial  
17 coordinator observes participants self-administer the study drug to ensure accuracy of dosing. The dose  
18 is documented in participant records. Timing of administration has been informed by delayed onset of  
19 effects observed with oral dosing of other cannabinoids[48] and the abovementioned preclinical study  
20 of CBN.  
21

### 22 **Data collection**

23 Study measures are described below, in order of assessment (see Table 1).  
24  
25  
26  
27  
28

**Table 1.** A summary of assessments completed throughout the investigation

| Measure (ordered first to last)                  | Screening | Treatment Session 1-3    |       |     |
|--------------------------------------------------|-----------|--------------------------|-------|-----|
|                                                  |           | At-home sleep monitoring | Night | Day |
| Informed consent                                 | ●         |                          |       |     |
| Medical examination                              | ●         |                          | ●     |     |
| Electrocardiogram                                | ●         |                          |       |     |
| Baseline questionnaires (ISI, ESS, HADS & PHQ-9) | ●         |                          |       |     |
| Urinary drug and alcohol screen                  | ●         |                          | ●     |     |
| Pregnancy test                                   | ●         |                          | ●     |     |
| Overnight PSG (clinical EEG)                     | ●         |                          | ●     |     |
| Actigraphy                                       |           | ●                        |       |     |
| Sleep diary (KSD)                                |           | ●                        |       |     |
| Oral fluid drug screen (Securetech DrugWipe)     |           |                          | ●     | ●   |
| Quantisal saliva collection                      |           |                          | ●     | ●   |
| Blood plasma collection                          |           |                          | ●     | ●   |
| Urine collection                                 |           |                          | ●     | ●   |
| Mood (POMS)                                      |           |                          | ●     | ●   |
| Drug effects (DEQ)                               |           |                          | ●     | ●   |
| Balance (posturography)                          |           |                          | ●     | ●   |
| Memory (FTT & WPT)                               |           |                          | ●     | ●   |
| KDT with EEG                                     |           |                          | ●     | ●   |
| Sleep questionnaires (LSEQ, RCSQ, & KSS)         |           |                          |       | ●   |
| Simulated driving performance                    |           |                          |       | ●   |
| PVT                                              |           |                          |       | ●   |

Note. DEQ=Drug Effects Questionnaire; EEG=electroencephalography; ESS=Epworth Sleepiness Scale; ISI=Insomnia Severity Index; HADS=Hospital Anxiety Depression Scale; KSD=Karolinska Sleep Diary; FTT=Finger Tapping Task; LSEQ= Leeds Sleep Evaluation Questionnaire; KSS, Karolinska Sleepiness Scale; PHQ-9=Patient Health Questionnaire-9; PVT=Psychomotor Vigilance Task; RCSQ=Richard Campbell Sleep Questionnaire; WPT=Word Pairs Task.

Insert Figure 2 here

**Figure 2.** *Schedule of events during each Treatment Session.* CBN = Cannabinol; DEQ=Drug Effects Questionnaire; EEG=electroencephalography; ESS=Epworth Sleepiness Scale; ISI=Insomnia Severity Index; HADS=Hospital Anxiety Depression Scale; KSD=Karolinska Sleep Diary; FTT=Finger Tapping Task; LSEQ=Leeds Sleep Evaluation Questionnaire; KSS=Karolinska Sleepiness Scale; PHQ-9=Patient Health Questionnaire-9; POMS= Profile of Mood States; POST=Posturography; PSG=Polysomnography; PVT=Psychomotor Vigilance Task; UDS=Urinary Drug Screen; WPT=Word Pairs Task.

#### Blood collection and plasma cannabinoid levels

Venous blood samples will be taken at baseline (~17:00 hours) and upon wake (~08:45 hours immediately after the simulated driving task). Samples are drawn into EDTA vacutainers (Becton, Dickinson and Company, New Jersey, USA) and centrifuged (2500×g for 10 min at 4°C). Supernatant plasma is aliquoted into 1.5 mL Eppendorf Tubes and stored at -80°C in the Woolcock Institute of Medical Research until study completion when samples will be transferred to the Lambert Initiative Laboratory. Samples will undergo liquid chromatography–mass spectrometry (LC–MS/MS) analysis, using previously published methodology.[49, 50] Plasma will be analysed for cannabinoids (e.g., CBN, THC, CBD), their metabolites (e.g., 11-OH-CBN, 11-COOH-CBN, 11-OH-THC, THC-COOH), endocannabinoids and related molecules (e.g., 2-AG and anandamide). We are testing for other cannabinoids and metabolites to verify abstinence from other cannabinoids and because the investigational product may contain minuscule quantities of THC ( $\leq 150 \mu\text{g}$ ).

#### Urine collection and urinary cannabinoid levels

Urine collection occurs at baseline, 2-hours post administration (~22:00 hours), upon wake (~07:00 hours), and prior to participant discharge (11:00 hours). Urine (~6 mL) is aliquoted into 1.5 mL Eppendorf Tubes and stored at -80°C before being transferred to the Lambert Initiative Laboratory for quantification of cannabinoid, cannabinoid metabolites, and endocannabinoids at study completion. LC–MS/MS analyses will be conducted using similar methodology to plasma.[49, 50] It is important to conduct urinary analyses as the pharmacokinetic profile of CBN is not well described.

#### Salivary drug testing

Oral fluid testing occurs at baseline, 30-minutes post administration, as well as immediately after the driving simulator task (~08:45 hours) using the DrugWipe® 5S (DW5s; Securetec, Neuberg, Germany) and Quantisal™ collection device (Immunoanalysis, Pomona, CA). The DW5s collects oral fluid (approximately 10–20  $\mu\text{L}$ ) from the tongue. The DW5s is commonly used in routine roadside drug-tests; however, demonstrates variable sensitivity (22-89%), specificity (50-100%), and accuracy (53-94%).[51] While ECS310 contains negligible quantities of THC, similarities in chemical structure between CBN and THC may conceivably lead to false-positive test results that would be a concern should CBN become widely used by patients.[52] As such, the Quantisal™ device is used to collect oral fluid from participants (~1 ml) which will be used in LC–MS/MS quantification of cannabinoid (CBN and THC) and metabolite concentrations. Samples will be placed in a stabilising buffer and stored at 4°C before being transferred to the Lambert Initiative Laboratory for analysis. Analyses will occur within three-months of collection.

#### Cognitive and psychomotor performance



1 Overnight declarative and procedural memory consolidation is assessed at each Treatment Session  
2 using the Word Pairs Task [WPT] and Finger Tapping Task [FTT], respectively. For both tasks,  
3 memory encoding during a learning phase occurs prior to drug administration (19:30 hours) with next-  
4 day retest occurring at approximately 09:00 hours. As THC can acutely impair cognitive function and  
5 memory (with prolonged use), it is necessary to examine CBN effects in this regard. Contrary to oral  
6 dosing studies, in one study, CBN reportedly caused a mild intoxication when administered  
7 intravenously at high doses (1.2mg/min)[53]. To investigate intoxication induced bodily sway, postural  
8 balance is being measured using the stabilometric balance platform (Advanced Medical Technologies  
9 Inc., AccuSwayPLUS Balance platform, MA, USA), which measures centre of pressure in anterior-  
10 posterior (y-axis) and medial-lateral (x-axis) directions using four strain gauge load cells at the bottom  
11 of the device. Centre of pressure will be assessed in eyes open and eyes closed conditions. Postural  
12 balance assessment takes less than 5 minutes to complete and will be repeated 3 times (i.e., baseline,  
13 60-minutes post drug administration, and next-day ~09:30 hours). The psychomotor vigilance test  
14 (PVT) is a commonly used reaction time based measure of attention and fatigue related changes in  
15 alertness[54] involving a hand-held box with a red-light emitting diode display of a three-digit  
16 millisecond counter (PVT-192, Ambulatory Monitoring Inc, Adley, NY, USA). During the 10-minute  
17 task, participants are instructed to respond as quickly as possible to stimuli appearing at variable  
18 intervals (ranging 2-10 seconds). The PVT will be repeated twice during next-day testing (09:30 and  
19 10:30 hours).

#### 21 Self-report questionnaires

22 Mood is being evaluated via the Profile of Mood States (POMS; 37-items with 5-point Likert  
23 scales)[55] questionnaire, a commonly used rating scale of transient and distinct moods. The Drug  
24 Effects Questionnaire (DEQ; 7-items with unipolar 100 mm visual analogue scales [VAS])[56] is used  
25 to evaluate subjective drug effect; including strength of drug effect, feeling stoned ('high'),  
26 liking/disliking the drug effect, feeling sedated, and feeling anxious. The POMS and DEQ are  
27 completed at baseline, 60-minutes post drug administration (21:00 hours), and the next day at 09:30  
28 and 10:30 hours. The Leeds Sleep Evaluation Questionnaire (LSEQ; 10-items with 100 mm VAS)[57]  
29 is a validated measure of the previous night's sleep quality (sleep onset, maintenance, and quality;  
30 including behaviour following waking) in comparison to usual. The Richard Campbell Sleep  
31 Questionnaire (RCSQ; 5-item with 100 mm VAS)[58] is used to measure perceived sleep depth, sleep  
32 latency (time to fall asleep), number of awakenings, and sleep efficiency and quality. The LSEQ and  
33 RCSQ are administered immediately after waking (~07:00 hours).

#### 35 Subjective and objective sleepiness

36 Karolinska Sleepiness Scale (KSS) and Karolinska Drowsiness Test (KDT) are used to measure  
37 subjective and objective sleepiness, respectively.[59] The KSS is a single-item rating scale assessing  
38 current sleepiness, ranging from 1 (*Extremely alert*) to 9 (*Extremely sleepy – fighting sleep*). KSS scores  
39 will be compared to the objective drowsiness ascertained using the KDT. During the KDT, resting  
40 awake EEG is measured while participants focus on a wall marker, with eyes open and closed across 2-  
41 minute intervals. The KSS and KDT are administered immediately prior to sleep (~23:00 hours) and  
42 upon wake (~07:00 hours).

#### 44 Polysomnography

45 Sleep is assessed using PSG (Grael PSG, Compumedics, USA), a multiparametric tool used for  
46 monitoring and diagnosing sleep disorders. PSG consists of 18 channels recording biophysical changes  
47 that occur during sleep, including brain activity (via EEG); muscle activity or skeletal muscle activation  
48 (electromyography [EMG]); eye movement (electrooculogram [EOG]); cardiac function (ECG);



1 respiratory effort using chest and abdominal belts; and digital pulse oximetry. To improve participant  
2 comfort/retention, pulse oximetry and the nasal cannula and thermistor will only be used to detect sleep  
3 disordered breathing during screening (Visit 2). PSG equipment will be fitted by an experienced sleep  
4 technician prior to sleep and will be removed the next morning once the KDT has been completed.  
5 Sleep and associated events will be scored according to AASM 2015 criteria in 30 second epochs.[31]  
6 Each patient's three polysomnograms will be scored by the same sleep technician.

### 7 Simulated driving performance

8 Next-day driving performance is measured at approximately 08:00 hours using a fixed-based driving  
9 simulator (Hyperdrive, Adelaide, Australia) equipped with standard vehicle controls (described  
10 elsewhere.[1, 43]) and using custom-built scenario developed using the SCANeR Studio Simulation  
11 Engine (version 2022.2 r25, AVSimulation, Paris, France). The 30-minute driving scenario incorporates  
12 three independent epochs: (1) a 'car following' drive (~7 minutes duration) that has previously  
13 demonstrated sensitivity to THC-induced impairment;[60] (2) a 'highway' drive (~17 minutes  
14 duration); and (3) a novel divided-attention drive (~6 minutes duration). The 6-minute divided-attention  
15 task employed in epoch 3 has been previously validated,[61] and is designed to replicate a casual  
16 mobile-phone conversation that does not require mental rehearsal or recall intervals of greater than 3  
17 seconds. During the divided-attention task, pre-recorded five-word sentences will be played every 10  
18 seconds (through a hands-free speaker). Participants immediately indicate whether the sentence was  
19 sensical (e.g., "*the truck delivered the package*") or non-sensical (e.g., "*the octopus burned the onions*")  
20 in nature; and 7 seconds later recall the last word in the sentence. The main outcome measure for all  
21 epochs of the driving task is standard deviation of lateral position (SDLP). This is a widely used measure  
22 of vehicular control that is sensitive to drug effects, with previous reports showing a THC dose-  
23 dependent increase in SDLP (higher represents more erratic driving), particularly in occasional cannabis  
24 users.[60, 62] Secondary outcomes for each driving epoch include: (epoch 1) average and standard  
25 deviation of car-following headway (i.e., following distance) and speed coherence (i.e., correlation  
26 between speed of lead and following car); (epochs 2 and 3) average speed, minimum and maximum  
27 speed, and standard deviation of speed (SDSP). The driving scenarios were programmed by investigator  
28 C.I.

### 29 **Adverse events**

30 Safety outcome measures are described above. Blood pressure is measured four times during each  
31 Treatment Session (~17:00, 18:30, 21:00, and 09:30 hours). Adverse event collection occurs via  
32 standardised interview at three timepoints (prior to discharge, and 7-hours and 7-days post-discharge).  
33 Passive adverse event collection occurs throughout the study protocol via open-ended interview and is  
34 recorded on paper form. A study physician will assess the severity and causality of each adverse event.

### 35 **Post-Treatment Session care**

36 Participants will be discharged from the research facility at approximately 11:00 hours and then  
37 contacted by the study co-ordinator that evening (18:00 hours), and one-week after each Treatment  
38 Session, to assess wellbeing and record any adverse events (including changes to sleep). Upon study  
39 completion, if deemed necessary in the study physician's opinion, a clinical follow-up will be arranged  
40 for participants on an individual basis.

### 41 **Data management**

42 Any information obtained for the purpose of this research that could identify participants will be treated  
43 as confidential and securely stored adhering to guidelines of the Sponsor, HREC, NHMRC National  
44 Statement on Ethical Conduct in Human Research (2007) and Note for Guidance on Good Clinical  
45

Practice (CPMP/ICH-135/95). All onboarding, consent and questionnaire data will be captured through SPARDAC™ (Single Page Application - Research Data Capture) developed by Wappsystem Pty Ltd and hosted on Amazon Web Services in Sydney, NSW. Participant data will be identified by unique codes. The code linking participant data to identity (e.g., name, date of birth, contact details) will be stored securely with password protection, and will not be accessible via the internet. Paper files will be stored in locked storage cabinets on-site. Digital participant data will be stored on a secure electronic data system, that is regularly backed up with disaster recovery features. All data will be stored securely for at least 15 years. Only study investigators will have access to participant data. Data monitoring occurs on a regular basis by the study investigators. Data integrity is being enforced through a variety of mechanisms including data rules, range checks, and consistency checks against data already stored in the database. Written documentation of changes will be available through electronic logs and audit trails. Study safety will also be internally monitored and evaluated regularly, with adverse events documented and reported according to Sponsor and HREC requirements. The decision to terminate the study lies with the principal investigators and will be based on the recruitment target and safety data. The PIs and trial coordinator will monitor data integrity throughout the trial.

### Trial management structure

This is a pilot study and does not require an intricate management structure. The advisory committee provide advice or complete discrete tasks (Table 2). The management of day-to-day trial activities is overseen by the principal investigators and the trial coordinator (IL, CH, & BY). This trial does not have an independent data safety monitoring committee because it is a single-site single-night small sample study with a medication that is thought to have a low side-effect profile in a group of patients that are known not to be at high risk of life-threatening events.[63]

### Roles and responsibilities

Table 2. Investigator roles and responsibilities

| Investigator                           | Role                                                                   |
|----------------------------------------|------------------------------------------------------------------------|
| Dr Camilla Hoyos                       | Principal Non-Medical Investigator                                     |
| Professor Brendon Yee                  | Principal Medical Investigator                                         |
| Professor Iain McGregor                | Advisory committee member (Pharmacologist and Cannabinoid Expert)      |
| Professor Ronald Grunstein             | Advisory committee member (Sleep Physician)                            |
| Professor Bandana Saini                | Advisory committee (Study Pharmacist)                                  |
| Associate Professor Nathaniel Marshall | Advisory committee (Study Statistician/Epidemiologist)                 |
| Associate Professor Christopher Gordon | Advisory committee member (Registered Nurse and Sleep Disorder Expert) |
| Dr Angela D'Rozario                    | Advisory committee member (Sleep Neurobiology Expert/Consultant)       |
| Dr Danielle McCartney                  | Driving Simulator and Cannabinoid Expert                               |
| Dr Chris Irwin                         | Advisory committee member (Driving Simulation Expert)                  |
| Ms Anastasia Suraev                    | Advisory committee member (Cannabinoid and Sleep Expert)               |

|                    |                            |
|--------------------|----------------------------|
| Ms Isobel Lavender | Clinical Trial Coordinator |
|--------------------|----------------------------|

## Statistical analyses

Statistical analyses will be completed using a commercial statistical package (e.g., SPSS, SAS, etc). Outcome data will be analysed using Linear Mixed Models due to expected inter-participant variability with repeated measures and handle missing data. Where baseline (i.e., 'pre-drug') data exist for the outcome being analysed, those scores will also be included in the model as a covariate. Participants will be random factors. Fixed factors will be treatment (placebo, 30 mg and 300 mg CBN) and the arm of the study. Analysis will be by intention to treat. Difference in least squared means inside the treatment main effect will only be investigated for the hypotheses that the two active treatments are superior to placebo. We will not present a p-value comparison for the two active doses. The critical p-values for each of these hypotheses is set at 0.05 (two-tailed). Effect sizes will be calculated as partial eta squared ( $\eta_p^2$ ), Cohen's d, and Hedges' g, where appropriate. The statistical code used to test the primary and 3 secondary outcomes will be written and published on a publicly available website before the completion of data collection.[64] We will not undertake any interim or stratified analyses.

## Dissemination policy and access to data

Study findings will be disseminated via scientific peer-reviewed publications, conferences, and media, as applicable. Information will be provided such that participants cannot be identified. Non-identifiable Individual Participant Data (IPD) will become available one year after study completion and will be available upon reasonable request to the principal investigators.

### 1 **Author contributions**

2 IL, AS, DM, CI, AD, CG, NSM, ISM, RRG, BY, and CMH were involved in methodological design  
3 and creation of the study protocol. BY and CMH are the principal investigators (medical and non-  
4 medical, respectively) who have overall responsibility for the design, conduct and decision to submit  
5 for publication. NSM is the study epidemiologist and statistician who will design and publish the  
6 analysis plan in collaboration with IL. IL is the trial coordinator responsible for collecting trial data. IL  
7 drafted the manuscript. Investigator roles and responsibilities are outlined in Table 1. All authors have  
8 read and approved the final manuscript.

### 10 **Funding**

11 The study is being funded by the Lambert Initiative for Cannabinoid Therapeutics, University of  
12 Sydney, a philanthropically funded centre for cannabinoid research. The investigational product was  
13 purchased from Medropharm (Zürich, Switzerland) through Bod Australia (Sydney, Australia); who  
14 was not involved in the conception nor design of the study. IL is supported by a Barry and Joy Lambert  
15 Postgraduate Research Scholarship. AS is supported by the Lambert Initiative for Cannabinoid  
16 Therapeutics, University of Sydney. CMH is funded by a National Heart Foundation Future Leader  
17 Fellowship. ALD (2008001) and RRG (1197439) are funded by National Health and Medical Research  
18 Council-Australian (NHMRC) Investigator Grants.

### 20 **Competing interest statement**

21 ISM is the Academic Director of the Lambert Initiative for Cannabinoid Therapeutics, University of  
22 Sydney. ISM is a consultant for Kinaxis Therapeutics, Psylo Ltd, and Emyria and is an inventor on  
23 several patents relating to novel cannabinoid and non-cannabinoid therapeutics unrelated to insomnia.  
24 He has received consulting fees from the Medicinal Cannabis Industry Australia (MCIA) and acts as an  
25 expert witness in legal cases involving cannabis-related issues. AS has received consulting fees from  
26 the Medicinal Cannabis Industry Australia (MCIA) and Haleon. RRG has received discounted  
27 investigational products for an unrelated clinical trial from Neurim Pharmaceuticals Inc and received  
28 investigational product and matched placebo from Teva Pharmaceutical in unrelated clinical trials. He  
29 has received funding for lectures for Pfizer, Teva, Jazz and Eisai in the past 3 years. The other authors  
30 have no competing interests to disclose. The Woolcock Institute Sleep and Chronobiology Research  
31 Group has received research support from Avadel, Nyxoah, Idorsa, ResMed, BOD Australia, and  
32 Philips.

### 34 **Patient consent for publication**

35 Not required.

## References

1. McCartney, D., et al., *Effects of cannabidiol on simulated driving and cognitive performance: A dose-ranging randomised controlled trial*. Journal of Psychopharmacology, 2022: p. 02698811221095356.
2. Medicine, A.A.o.S., *International Classification of Sleep Disorders*, ed. Darien. 2014, IL: American Academy of Sleep Medicine.
3. Appleton, S.L., et al., *Prevalence and comorbidity of sleep conditions in Australian adults: 2016 Sleep Health Foundation national survey*. Sleep Health, 2018. **4**(1): p. 13-19.
4. Morin, C.M., et al., *Incidence, Persistence, and Remission Rates of Insomnia Over 5 Years*. JAMA Network Open, 2020. **3**(11): p. e2018782-e2018782.
5. Riemann, D., et al., *Sleep, insomnia, and depression*. Neuropsychopharmacology, 2020. **45**(1): p. 74-89.
6. de Almondes, K.M., et al., *Insomnia and risk of dementia in older adults: Systematic review and meta-analysis*. J Psychiatr Res, 2016. **77**: p. 109-15.
7. Streatfeild, J., et al., *The social and economic cost of sleep disorders*. Sleep, 2021. **44**(11).
8. Grima, N.A., B. Bei, and D. Mansfield, *Insomnia management*. Australian Journal for General Practitioners, 2019. **48**(4): p. 198-202.
9. Koffel, E., A.D. Bramoweth, and C.S. Ulmer, *Increasing access to and utilization of cognitive behavioral therapy for insomnia (CBT-I): a narrative review*. J Gen Intern Med, 2018. **33**(6): p. 955-962.
10. Matthews, E.E., et al., *Adherence to cognitive behavioral therapy for insomnia: a systematic review*. Sleep Med Rev, 2013. **17**(6): p. 453-64.
11. Troxel, W.M., et al., *Predictors of treatment response to brief behavioral treatment of insomnia (BBTI) in older adults*. J Clin Sleep Med, 2013. **9**(12): p. 1281-9.
12. Crowe, S.F. and E.K. Stranks, *The Residual Medium and Long-term Cognitive Effects of Benzodiazepine Use: An Updated Meta-analysis*. Arch Clin Neuropsychol, 2018. **33**(7): p. 901-911.
13. Lu, H.C. and K. Mackie, *An Introduction to the Endogenous Cannabinoid System*. Biol Psychiatry, 2016. **79**(7): p. 516-25.
14. Lintzeris, N., et al., *Medical cannabis use in the Australian community following introduction of legal access: the 2018-2019 Online Cross-Sectional Cannabis as Medicine Survey (CAMS-18)*. Harm Reduct J, 2020. **17**(1): p. 37.
15. Corroon, J., *Cannabinol and Sleep: Separating Fact from Fiction*. Cannabis Cannabinoid Res, 2021. **6**(5): p. 366-371.
16. Hazekamp, A., et al., *Chemistry of Cannabis*, in *Comprehensive Natural Products II*. 2010, Science Direct: Leiden, The Netherlands. p. 1033-1084.
17. Hartley, M. *Leafly*. The 'sleepy' cannabinoid CBN might not actually be sedating 2019; Available from: <https://www.leafly.com/news/health/is-cbn-cannabinoid-sedating>.
18. *Full Spectrum CBN Oil (60mg/mL)*. 2022; Available from: <https://nuleafnaturals.com/product/full-spectrum-cbn-oil-60mg-ml/#:~:text=NuLeaf%20Naturals%20suggests%20a%20starting,Improved%20sleep%20and%20relaxation>.
19. Kesner, A.J. and D.M. Lovinger, *Cannabinoids, Endocannabinoids and Sleep*. Front Mol Neurosci, 2020. **13**: p. 125.
20. Murillo-Rodriguez, E., *The role of the CB1 receptor in the regulation of sleep*. Prog Neuropsychopharmacol Biol Psychiatry, 2008. **32**(6): p. 1420-7.



- 1 21. Sanford, A.E., E. Castillo, and R.L. Gannon, *Cannabinoids and hamster circadian*
- 2 *activity rhythms*. Brain Res, 2008. **1222**: p. 141-8.
- 3 22. Murillo-Rodriguez, E., et al., *Anandamide-induced sleep is blocked by SR141716A, a*
- 4 *CBI receptor antagonist and by U73122, a phospholipase C inhibitor*. Neuroreport,
- 5 2001. **12**(10): p. 2131-2136.
- 6 23. Murillo-Rodriguez, E., et al., *Anandamide modulates sleep and memory in rats*. Brain
- 7 Res, 1998. **812**(1-2): p. 270-4.
- 8 24. Steinberg, B.A. and C.P. Cannon, *Cannabinoid-1 receptor blockade in*
- 9 *cardiometabolic risk reduction: safety, tolerability, and therapeutic potential*. Am J
- 10 *Cardiol*, 2007. **100**(12A): p. 27P-32P.
- 11 25. Zou, S. and U. Kumar, *Cannabinoid Receptors and the Endocannabinoid System:*
- 12 *Signaling and Function in the Central Nervous System*. Int J Mol Sci, 2018. **19**(3).
- 13 26. Wallach, J., *Medicinal Cannabis: an overview for health-care providers*, in
- 14 *Remington*. 2021. p. 75-101.
- 15 27. Pertwee, R., et al., *International Union of Basic and Clinical Pharmacology. LXXIX.*
- 16 *Cannabinoid receptors and their ligands: beyond CB(1) and CB(2)*. .
- 17 *Pharmacological Reviews*, 2010. **62**(4): p. 588-631.
- 18 28. Yamamoto, I., et al., *Pharmacology and Toxicology of Major Constituents of*
- 19 *Marijuana—On the Metabolic Activation of Cannabinoids and Its Mechanism*.
- 20 *Journal of Toxicology: Toxin Reviews*, 2003. **22**(4): p. 577-589.
- 21 29. Walsh, J.H., et al., *Treating insomnia symptoms with medicinal cannabis: a*
- 22 *randomized, crossover trial of the efficacy of a cannabinoid medicine compared with*
- 23 *placebo*. Sleep, 2021. **44**(11).
- 24 30. Gannon, W., et al., *Novel Formulation of THC and CBN in a Repeat-Action Tablet*
- 25 *Improves Objective and Subjective Measurements of Sleep* American Journal of
- 26 *Endocannabinoid Medicine*, 2021. **3**(1): p. 12-18.
- 27 31. Berry, R.B., et al., *AASM Scoring Manual Version 2.2 Updates: New Chapters for*
- 28 *Scoring Infant Sleep Staging and Home Sleep Apnea Testing*. J Clin Sleep Med, 2015.
- 29 **11**(11): p. 1253-4.
- 30 32. *Standard for the Uniform Scheduling of Medicines and Poisons*. 2022, Therapeutic
- 31 *Goods Administration: Woden, Australia*.
- 32 33. Gong, H., Jr., et al., *Acute and subacute bronchial effects of oral cannabinoids*. Clin
- 33 *Pharmacol Ther*, 1984. **35**(1): p. 26-32.
- 34 34. Karniol, I.G., et al., *Effects of delta9-tetrahydrocannabinol and cannabiol in man*.
- 35 *Pharmacology*, 1975. **13**(6): p. 502-12.
- 36 35. Bird, K.D., et al., *Intercannabinoid and Cannabinoid-Ethanol Interactions and Their*
- 37 *Effects on Human-Performance*. Psychopharmacology, 1980. **71**(2): p. 181-188.
- 38 36. Hollister, L., *Cannabidiol and Cannabiol in Man*, Specialia, Editor. 1973,
- 39 *Experientia*.
- 40 37. Chan, A.W., et al., *SPIRIT 2013 statement: defining standard protocol items for*
- 41 *clinical trials*. Ann Intern Med, 2013. **158**(3): p. 200-7.
- 42 38. *International Classification of Sleep Disorders*. 3 ed, ed. A.A.o.S. Medicine. 2014,
- 43 *Darien, IL: American Academy of Sleep Medicine*.
- 44 39. *Diagnostic and statistical manual of mental disorders : DSM-5*, in *American*
- 45 *Psychiatric Association. Diagnostic and statistical manual of mental disorders, Fifth*
- 46 *edition*. 2013, American Psychiatric Publishing: Arlington, VA.
- 47 40. Edwards, B.A., et al., *Aging and sleep: physiology and pathophysiology*. Semin
- 48 *Respir Crit Care Med*, 2010. **31**(5): p. 618-33.
- 49 41. Whiting, P.F., et al., *Cannabinoids for Medical Use: A Systematic Review and Meta-*
- 50 *analysis*. JAMA, 2015. **313**(24): p. 2456-73.

- 1  
2  
3  
4  
5  
6  
7  
8  
9  
10  
11  
12  
13  
14  
15  
16  
17  
18  
19  
20  
21  
22  
23  
24  
25  
26  
27  
28  
29  
30  
31  
32  
33  
34  
35  
36  
37  
38  
39  
40  
41  
42  
43  
44  
45  
46  
47  
48  
49  
50  
51  
52  
53  
54  
55  
56  
57  
58  
59  
60
- 1 42. Spitzer, R.L., K. Kroenke, and J.B. Williams, *Validation and utility of a self-report version of PRIME-MD: the PHQ primary care study. Primary Care Evaluation of Mental Disorders. Patient Health Questionnaire.* *Jama*, 1999. **282**(18): p. 1737-44.
- 2  
3  
4  
5  
6  
7  
8  
9  
10  
11  
12  
13  
14  
15  
16  
17  
18  
19  
20  
21  
22  
23  
24  
25  
26  
27  
28  
29  
30  
31  
32  
33  
34  
35  
36  
37  
38  
39  
40  
41  
42  
43  
44  
45  
46  
47  
48  
49  
50  
51  
52  
53  
54  
55  
56  
57  
58  
59  
60
43. Suraev, A., et al., *Cannabidiol (CBD) and Delta(9)-tetrahydrocannabinol (THC) for chronic insomnia disorder ('CANSLEEP' trial): protocol for a randomised, placebo-controlled, double-blinded, proof-of-concept trial.* *BMJ Open*, 2020. **10**(5): p. e034421.
44. Bastien, C.H., A. Vallières, and C.M. Morin, *Validation of the Insomnia Severity Index as an outcome measure for insomnia research.* *Sleep Med*, 2001. **2**(4): p. 297-307.
45. Johns, M.W., *A new method for measuring daytime sleepiness: the Epworth sleepiness scale.* *Sleep*, 1991. **14**(6): p. 540-5.
46. Zigmond, A.S. and R.P. Snaith, *The hospital anxiety and depression scale.* *Acta Psychiatr Scand*, 1983. **67**(6): p. 361-70.
47. Akerstedt, T., et al., *The subjective meaning of good sleep, an intraindividual approach using the Karolinska Sleep Diary.* *Percept Mot Skills*, 1994. **79**(1 Pt 1): p. 287-96.
48. Huestis, M.A., *Human cannabinoid pharmacokinetics.* *Chem Biodivers*, 2007. **4**(8): p. 1770-804.
49. Kevin, R.C., et al., *Urinary cannabinoid levels during nabiximols (Sativex®)-medicated inpatient cannabis withdrawal.* *Forensic Toxicology*, 2017. **35**(1): p. 33-44.
50. Sahinovic, A., et al., *Effects of Cannabidiol on Exercise Physiology and Bioenergetics: A Randomised Controlled Pilot Trial.* *Sports Med Open*, 2022. **8**(1): p. 27.
51. McCartney, D., et al., *Orally administered cannabidiol does not produce false-positive tests for  $\Delta^9$ -tetrahydrocannabinol on the Securetec DrugWipe® 5S or Dräger DrugTest® 5000.* *Drug Testing and Analysis*, 2022. **14**(1): p. 137-143.
52. McCartney, D., et al., *Orally administered cannabidiol does not produce false-positive tests for  $\Delta(9)$ -tetrahydrocannabinol on the Securetec DrugWipe® 5S or Dräger DrugTest® 5000.* *Drug Test Anal*, 2022. **14**(1): p. 137-143.
53. Perez-Reyes, M., et al., *A comparison of the pharmacological activity in man of intravenously administered delta9-tetrahydrocannabinol, cannabinol, and cannabidiol.* *Experientia*, 1973. **29**(11): p. 1368-9.
54. Basner, M., D. Mollicone, and D.F. Dinges, *Validity and Sensitivity of a Brief Psychomotor Vigilance Test (PVT-B) to Total and Partial Sleep Deprivation.* *Acta Astronaut*, 2011. **69**(11-12): p. 949-959.
55. Gibson, S.J., *The measurement of mood states in older adults.* *J Gerontol B Psychol Sci Soc Sci*, 1997. **52**(4): p. P167-74.
56. Morean, M.E., et al., *The drug effects questionnaire: psychometric support across three drug types.* *Psychopharmacology (Berl)*, 2013. **227**(1): p. 177-92.
57. Shahid, A., et al., *Leeds Sleep Evaluation Questionnaire (LSEQ).* 2011, Springer New York: New York, NY. p. 211-213.
58. Turci, A.M., et al., *The Brazilian Portuguese version of the revised Maastricht Upper Extremity Questionnaire (MUEQ-Br revised): translation, cross-cultural adaptation, reliability, and structural validation.* *BMC Musculoskelet Disord*, 2015. **16**: p. 41.
59. Putilov, A.A. and O.G. Donskaya, *Construction and validation of the EEG analogues of the Karolinska sleepiness scale based on the Karolinska drowsiness test.* *Clinical neurophysiology*, 2013. **124**(7): p. 1346-1352.



- 1  
2  
3 1 60. Arkell, T.R., et al., *Cannabidiol (CBD) content in vaporized cannabis does not*  
4 2 *prevent tetrahydrocannabinol (THC)-induced impairment of driving and cognition.*  
5 3 *Psychopharmacology (Berl)*, 2019. **236**(9): p. 2713-2724.  
6 4 61. Ogata, N.G., et al., *Mobile Telephone Use and Reaction Time in Drivers With*  
7 5 *Glaucoma.* *JAMA Netw Open*, 2019. **2**(4): p. e192169.  
8 6 62. McCartney, D., et al., *Determining the magnitude and duration of acute Delta(9)-*  
9 7 *tetrahydrocannabinol (Delta(9)-THC)-induced driving and cognitive impairment: A*  
10 8 *systematic and meta-analytic review.* *Neurosci Biobehav Rev*, 2021. **126**: p. 175-193.  
11 9 63. Ellenberg, S.S., T.R. Fleming, and D.L. DeMets, *Data monitoring in clinical trials : a*  
12 10 *practical perspective.* Second edition. ed. *Statistics in practice.* 2019, Hoboken, NJ:  
13 11 Wiley.  
14 12 64. Gamble, C., et al., *Guidelines for the Content of Statistical Analysis Plans in Clinical*  
15 13 *Trials.* *JAMA*, 2017. **318**(23): p. 2337-2343.  
16  
17  
18  
19  
20  
21  
22  
23  
24  
25  
26  
27  
28  
29  
30  
31  
32  
33  
34  
35  
36  
37  
38  
39  
40  
41  
42  
43  
44  
45  
46  
47  
48  
49  
50  
51  
52  
53  
54  
55  
56  
57  
58  
59  
60

1  
2  
3  
4  
5  
6  
7  
8  
9  
10  
11  
12  
13  
14  
15  
16  
17  
18  
19  
20  
21  
22  
23  
24  
25  
26  
27  
28  
29  
30  
31  
32  
33  
34  
35  
36  
37  
38  
39  
40  
41  
42  
43  
44  
45  
46  
47  
48  
49  
50  
51  
52  
53  
54  
55  
56  
57  
58  
59  
60

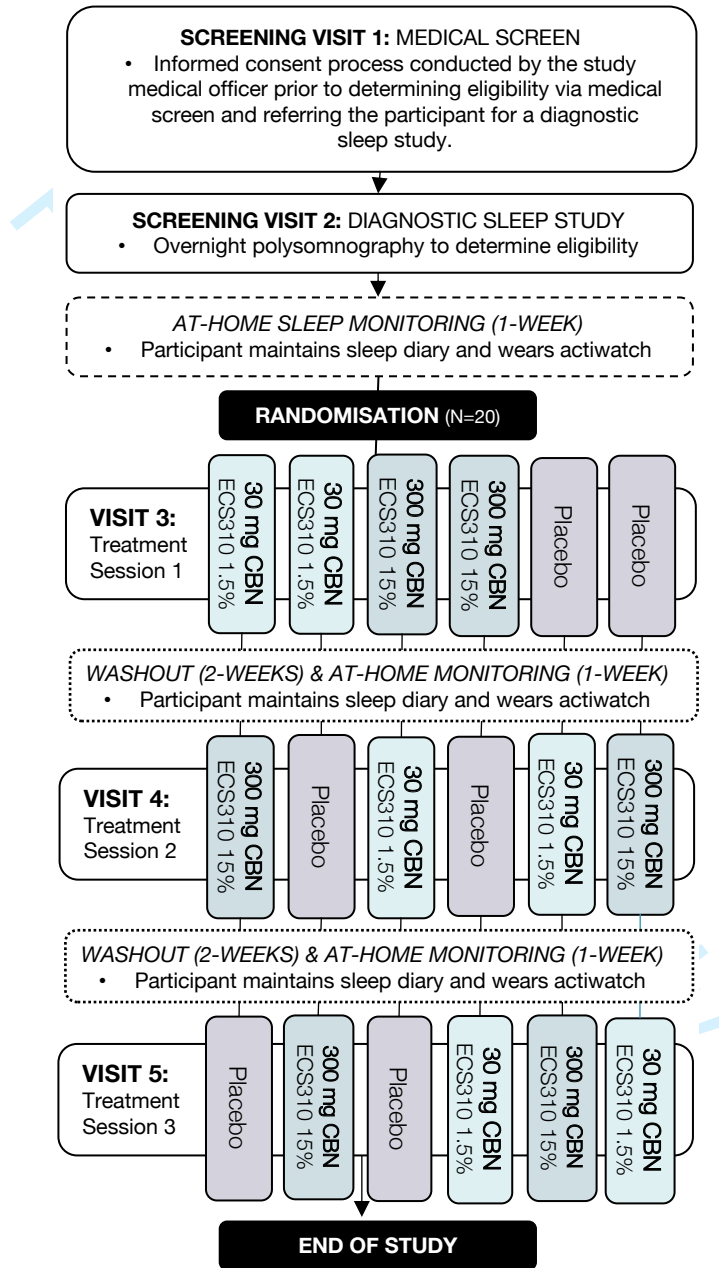

1  
2  
3  
4  
5  
6  
7  
8  
9  
10  
11  
12  
13  
14  
15  
16  
17

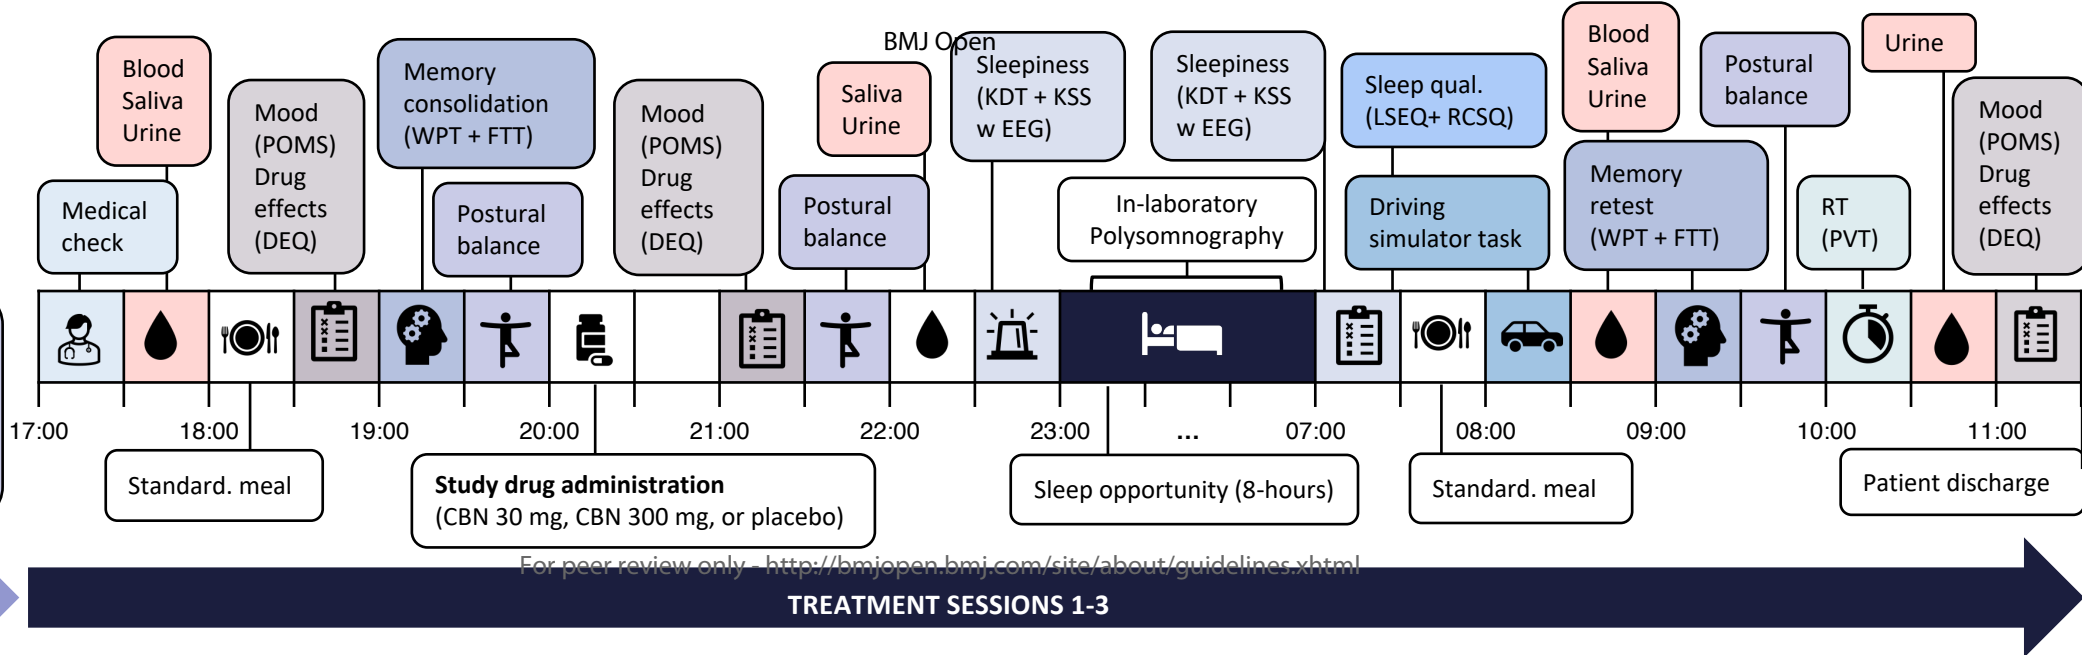

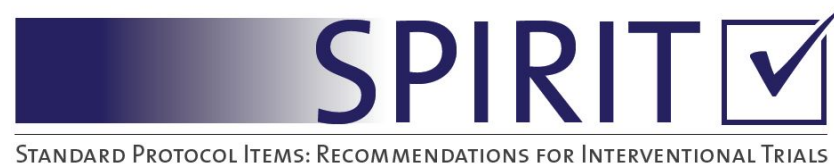

SPIRIT 2013 Checklist: Recommended items to address in a clinical trial protocol and related documents\*

| Section/item                      | Item No | Description                                                                                                                                                                                                                                                                              | Addressed on page number |
|-----------------------------------|---------|------------------------------------------------------------------------------------------------------------------------------------------------------------------------------------------------------------------------------------------------------------------------------------------|--------------------------|
| <b>Administrative information</b> |         |                                                                                                                                                                                                                                                                                          |                          |
| Title                             | 1       | Descriptive title identifying the study design, population, interventions, and, if applicable, trial acronym                                                                                                                                                                             | 1 _____                  |
| Trial registration                | 2a      | Trial identifier and registry name. If not yet registered, name of intended registry                                                                                                                                                                                                     | 1,5                      |
|                                   | 2b      | All items from the World Health Organization Trial Registration Data Set                                                                                                                                                                                                                 | In trial registration    |
| Protocol version                  | 3       | Date and version identifier                                                                                                                                                                                                                                                              | 5                        |
| Funding                           | 4       | Sources and types of financial, material, and other support                                                                                                                                                                                                                              | 1,2,5,16                 |
| Roles and responsibilities        | 5a      | Names, affiliations, and roles of protocol contributors                                                                                                                                                                                                                                  | 1,5,14-16                |
|                                   | 5b      | Name and contact information for the trial sponsor                                                                                                                                                                                                                                       | 1 and trial registration |
|                                   | 5c      | Role of study sponsor and funders, if any, in study design; collection, management, analysis, and interpretation of data; writing of the report; and the decision to submit the report for publication, including whether they will have ultimate authority over any of these activities | 5,16                     |
|                                   | 5d      | Composition, roles, and responsibilities of the coordinating centre, steering committee, endpoint adjudication committee, data management team, and other individuals or groups overseeing the trial, if applicable (see Item 21a for data monitoring committee)                         | 14-16                    |

1 **Introduction**

2

3 Background and 6a Description of research question and justification for undertaking the trial, including summary of relevant 4-5  
 4 rationale studies (published and unpublished) examining benefits and harms for each intervention

5

6 6b Explanation for choice of comparators 4

7

8 Objectives 7 Specific objectives or hypotheses 4

9

10 Trial design 8 Description of trial design including type of trial (eg, parallel group, crossover, factorial, single group), 4  
 11 allocation ratio, and framework (eg, superiority, equivalence, noninferiority, exploratory)

12

13

14 **Methods: Participants, interventions, and outcomes**

15

16 Study setting 9 Description of study settings (eg, community clinic, academic hospital) and list of countries where data will 5  
 17 be collected. Reference to where list of study sites can be obtained

18

19 Eligibility criteria 10 Inclusion and exclusion criteria for participants. If applicable, eligibility criteria for study centres and 6-7 (Box 1)  
 20 individuals who will perform the interventions (eg, surgeons, psychotherapists)

21

22 Interventions 11a Interventions for each group with sufficient detail to allow replication, including how and when they will be 7  
 23 administered

24

25 11b Criteria for discontinuing or modifying allocated interventions for a given trial participant (eg, drug dose 6-7 (Box 1)  
 26 change in response to harms, participant request, or improving/worsening disease)

27

28 11c Strategies to improve adherence to intervention protocols, and any procedures for monitoring adherence 7, 13  
 29 (eg, drug tablet return, laboratory tests)

30

31 11d Relevant concomitant care and interventions that are permitted or prohibited during the trial 6-7 (Box 1)

32

33

34 Outcomes 12 Primary, secondary, and other outcomes, including the specific measurement variable (eg, systolic blood 4, trial registry  
 35 pressure), analysis metric (eg, change from baseline, final value, time to event), method of aggregation (eg,  
 36 median, proportion), and time point for each outcome. Explanation of the clinical relevance of chosen  
 37 efficacy and harm outcomes is strongly recommended

38

39

40 Participant timeline 13 Time schedule of enrolment, interventions (including any run-ins and washouts), assessments, and visits for Table 1; Figures 1-  
 41 participants. A schematic diagram is highly recommended (see Figure) 2

42

43

44

45

46

|   |             |    |                                                                                                                                                                                       |   |
|---|-------------|----|---------------------------------------------------------------------------------------------------------------------------------------------------------------------------------------|---|
| 1 | Sample size | 14 | Estimated number of participants needed to achieve study objectives and how it was determined, including clinical and statistical assumptions supporting any sample size calculations | 7 |
| 2 |             |    |                                                                                                                                                                                       |   |
| 3 |             |    |                                                                                                                                                                                       |   |
| 4 | Recruitment | 15 | Strategies for achieving adequate participant enrolment to reach target sample size                                                                                                   | 7 |
| 5 |             |    |                                                                                                                                                                                       |   |

### 6 **Methods: Assignment of interventions (for controlled trials)**

#### 7 Allocation:

|    |                    |     |                                                                                                                                                                                                                                                                                                                                                          |   |
|----|--------------------|-----|----------------------------------------------------------------------------------------------------------------------------------------------------------------------------------------------------------------------------------------------------------------------------------------------------------------------------------------------------------|---|
| 8  |                    |     |                                                                                                                                                                                                                                                                                                                                                          |   |
| 9  |                    |     |                                                                                                                                                                                                                                                                                                                                                          |   |
| 10 | Sequence           | 16a | Method of generating the allocation sequence (eg, computer-generated random numbers), and list of any factors for stratification. To reduce predictability of a random sequence, details of any planned restriction (eg, blocking) should be provided in a separate document that is unavailable to those who enrol participants or assign interventions | 8 |
| 11 | generation         |     |                                                                                                                                                                                                                                                                                                                                                          |   |
| 12 |                    |     |                                                                                                                                                                                                                                                                                                                                                          |   |
| 13 |                    |     |                                                                                                                                                                                                                                                                                                                                                          |   |
| 14 |                    |     |                                                                                                                                                                                                                                                                                                                                                          |   |
| 15 |                    |     |                                                                                                                                                                                                                                                                                                                                                          |   |
| 16 | Allocation         | 16b | Mechanism of implementing the allocation sequence (eg, central telephone; sequentially numbered, opaque, sealed envelopes), describing any steps to conceal the sequence until interventions are assigned                                                                                                                                                | 8 |
| 17 | concealment        |     |                                                                                                                                                                                                                                                                                                                                                          |   |
| 18 | mechanism          |     |                                                                                                                                                                                                                                                                                                                                                          |   |
| 19 |                    |     |                                                                                                                                                                                                                                                                                                                                                          |   |
| 20 | Implementation     | 16c | Who will generate the allocation sequence, who will enrol participants, and who will assign participants to interventions                                                                                                                                                                                                                                | 8 |
| 21 |                    |     |                                                                                                                                                                                                                                                                                                                                                          |   |
| 22 |                    |     |                                                                                                                                                                                                                                                                                                                                                          |   |
| 23 |                    |     |                                                                                                                                                                                                                                                                                                                                                          |   |
| 24 | Blinding (masking) | 17a | Who will be blinded after assignment to interventions (eg, trial participants, care providers, outcome assessors, data analysts), and how                                                                                                                                                                                                                | 8 |
| 25 |                    |     |                                                                                                                                                                                                                                                                                                                                                          |   |
| 26 |                    |     |                                                                                                                                                                                                                                                                                                                                                          |   |
| 27 |                    | 17b | If blinded, circumstances under which unblinding is permissible, and procedure for revealing a participant's allocated intervention during the trial                                                                                                                                                                                                     | 8 |
| 28 |                    |     |                                                                                                                                                                                                                                                                                                                                                          |   |
| 29 |                    |     |                                                                                                                                                                                                                                                                                                                                                          |   |
| 30 |                    |     |                                                                                                                                                                                                                                                                                                                                                          |   |

### 31 **Methods: Data collection, management, and analysis**

|    |                 |     |                                                                                                                                                                                                                                                                                                                                                                                                              |      |
|----|-----------------|-----|--------------------------------------------------------------------------------------------------------------------------------------------------------------------------------------------------------------------------------------------------------------------------------------------------------------------------------------------------------------------------------------------------------------|------|
| 32 |                 |     |                                                                                                                                                                                                                                                                                                                                                                                                              |      |
| 33 | Data collection | 18a | Plans for assessment and collection of outcome, baseline, and other trial data, including any related processes to promote data quality (eg, duplicate measurements, training of assessors) and a description of study instruments (eg, questionnaires, laboratory tests) along with their reliability and validity, if known. Reference to where data collection forms can be found, if not in the protocol | 9-13 |
| 34 | methods         |     |                                                                                                                                                                                                                                                                                                                                                                                                              |      |
| 35 |                 |     |                                                                                                                                                                                                                                                                                                                                                                                                              |      |
| 36 |                 |     |                                                                                                                                                                                                                                                                                                                                                                                                              |      |
| 37 |                 |     |                                                                                                                                                                                                                                                                                                                                                                                                              |      |
| 38 |                 |     |                                                                                                                                                                                                                                                                                                                                                                                                              |      |
| 39 |                 | 18b | Plans to promote participant retention and complete follow-up, including list of any outcome data to be collected for participants who discontinue or deviate from intervention protocols                                                                                                                                                                                                                    | 7    |
| 40 |                 |     |                                                                                                                                                                                                                                                                                                                                                                                                              |      |
| 41 |                 |     |                                                                                                                                                                                                                                                                                                                                                                                                              |      |
| 42 |                 |     |                                                                                                                                                                                                                                                                                                                                                                                                              |      |

|    |                                 |     |                                                                                                                                                                                                                                                                                                                                       |       |
|----|---------------------------------|-----|---------------------------------------------------------------------------------------------------------------------------------------------------------------------------------------------------------------------------------------------------------------------------------------------------------------------------------------|-------|
| 1  | Data management                 | 19  | Plans for data entry, coding, security, and storage, including any related processes to promote data quality (eg, double data entry; range checks for data values). Reference to where details of data management procedures can be found, if not in the protocol                                                                     | 13-14 |
| 2  |                                 |     |                                                                                                                                                                                                                                                                                                                                       |       |
| 3  |                                 |     |                                                                                                                                                                                                                                                                                                                                       |       |
| 4  |                                 |     |                                                                                                                                                                                                                                                                                                                                       |       |
| 5  | Statistical methods             | 20a | Statistical methods for analysing primary and secondary outcomes. Reference to where other details of the statistical analysis plan can be found, if not in the protocol                                                                                                                                                              | 14    |
| 6  |                                 |     |                                                                                                                                                                                                                                                                                                                                       |       |
| 7  |                                 |     |                                                                                                                                                                                                                                                                                                                                       |       |
| 8  |                                 | 20b | Methods for any additional analyses (eg, subgroup and adjusted analyses)                                                                                                                                                                                                                                                              | 14    |
| 9  |                                 |     |                                                                                                                                                                                                                                                                                                                                       |       |
| 10 |                                 | 20c | Definition of analysis population relating to protocol non-adherence (eg, as randomised analysis), and any statistical methods to handle missing data (eg, multiple imputation)                                                                                                                                                       | 14    |
| 11 |                                 |     |                                                                                                                                                                                                                                                                                                                                       |       |
| 12 |                                 |     |                                                                                                                                                                                                                                                                                                                                       |       |
| 13 |                                 |     |                                                                                                                                                                                                                                                                                                                                       |       |
| 14 | <b>Methods: Monitoring</b>      |     |                                                                                                                                                                                                                                                                                                                                       |       |
| 15 |                                 |     |                                                                                                                                                                                                                                                                                                                                       |       |
| 16 | Data monitoring                 | 21a | Composition of data monitoring committee (DMC); summary of its role and reporting structure; statement of whether it is independent from the sponsor and competing interests; and reference to where further details about its charter can be found, if not in the protocol. Alternatively, an explanation of why a DMC is not needed | 13-14 |
| 17 |                                 |     |                                                                                                                                                                                                                                                                                                                                       |       |
| 18 |                                 |     |                                                                                                                                                                                                                                                                                                                                       |       |
| 19 |                                 |     |                                                                                                                                                                                                                                                                                                                                       |       |
| 20 |                                 |     |                                                                                                                                                                                                                                                                                                                                       |       |
| 21 |                                 |     |                                                                                                                                                                                                                                                                                                                                       |       |
| 22 |                                 | 21b | Description of any interim analyses and stopping guidelines, including who will have access to these interim results and make the final decision to terminate the trial                                                                                                                                                               | 13-14 |
| 23 |                                 |     |                                                                                                                                                                                                                                                                                                                                       |       |
| 24 |                                 |     |                                                                                                                                                                                                                                                                                                                                       |       |
| 25 | Harms                           | 22  | Plans for collecting, assessing, reporting, and managing solicited and spontaneously reported adverse events and other unintended effects of trial interventions or trial conduct                                                                                                                                                     | 13-14 |
| 26 |                                 |     |                                                                                                                                                                                                                                                                                                                                       |       |
| 27 |                                 |     |                                                                                                                                                                                                                                                                                                                                       |       |
| 28 | Auditing                        | 23  | Frequency and procedures for auditing trial conduct, if any, and whether the process will be independent from investigators and the sponsor                                                                                                                                                                                           | 13-14 |
| 29 |                                 |     |                                                                                                                                                                                                                                                                                                                                       |       |
| 30 |                                 |     |                                                                                                                                                                                                                                                                                                                                       |       |
| 31 |                                 |     |                                                                                                                                                                                                                                                                                                                                       |       |
| 32 | <b>Ethics and dissemination</b> |     |                                                                                                                                                                                                                                                                                                                                       |       |
| 33 |                                 |     |                                                                                                                                                                                                                                                                                                                                       |       |
| 34 | Research ethics approval        | 24  | Plans for seeking research ethics committee/institutional review board (REC/IRB) approval                                                                                                                                                                                                                                             | 1,2,5 |
| 35 |                                 |     |                                                                                                                                                                                                                                                                                                                                       |       |
| 36 |                                 |     |                                                                                                                                                                                                                                                                                                                                       |       |
| 37 | Protocol amendments             | 25  | Plans for communicating important protocol modifications (eg, changes to eligibility criteria, outcomes, analyses) to relevant parties (eg, investigators, REC/IRBs, trial participants, trial registries, journals, regulators)                                                                                                      | 5     |
| 38 |                                 |     |                                                                                                                                                                                                                                                                                                                                       |       |
| 39 |                                 |     |                                                                                                                                                                                                                                                                                                                                       |       |
| 40 |                                 |     |                                                                                                                                                                                                                                                                                                                                       |       |
| 41 |                                 |     |                                                                                                                                                                                                                                                                                                                                       |       |
| 42 |                                 |     |                                                                                                                                                                                                                                                                                                                                       |       |
| 43 |                                 |     |                                                                                                                                                                                                                                                                                                                                       |       |
| 44 |                                 |     |                                                                                                                                                                                                                                                                                                                                       |       |
| 45 |                                 |     |                                                                                                                                                                                                                                                                                                                                       |       |
| 46 |                                 |     |                                                                                                                                                                                                                                                                                                                                       |       |



|    |                               |     |                                                                                                                                                                                                                                                                                     |                    |
|----|-------------------------------|-----|-------------------------------------------------------------------------------------------------------------------------------------------------------------------------------------------------------------------------------------------------------------------------------------|--------------------|
| 1  | Consent or assent             | 26a | Who will obtain informed consent or assent from potential trial participants or authorised surrogates, and how (see Item 32)                                                                                                                                                        | 7-8                |
| 2  |                               |     |                                                                                                                                                                                                                                                                                     |                    |
| 3  |                               |     |                                                                                                                                                                                                                                                                                     |                    |
| 4  |                               | 26b | Additional consent provisions for collection and use of participant data and biological specimens in ancillary studies, if applicable                                                                                                                                               | N/A                |
| 5  |                               |     |                                                                                                                                                                                                                                                                                     |                    |
| 6  |                               |     |                                                                                                                                                                                                                                                                                     |                    |
| 7  | Confidentiality               | 27  | How personal information about potential and enrolled participants will be collected, shared, and maintained in order to protect confidentiality before, during, and after the trial                                                                                                | 13-14              |
| 8  |                               |     |                                                                                                                                                                                                                                                                                     |                    |
| 9  |                               |     |                                                                                                                                                                                                                                                                                     |                    |
| 10 | Declaration of interests      | 28  | Financial and other competing interests for principal investigators for the overall trial and each study site                                                                                                                                                                       | 1,16               |
| 11 |                               |     |                                                                                                                                                                                                                                                                                     |                    |
| 12 |                               |     |                                                                                                                                                                                                                                                                                     |                    |
| 13 | Access to data                | 29  | Statement of who will have access to the final trial dataset, and disclosure of contractual agreements that limit such access for investigators                                                                                                                                     | 13                 |
| 14 |                               |     |                                                                                                                                                                                                                                                                                     |                    |
| 15 |                               |     |                                                                                                                                                                                                                                                                                     |                    |
| 16 | Ancillary and post-trial care | 30  | Provisions, if any, for ancillary and post-trial care, and for compensation to those who suffer harm from trial participation                                                                                                                                                       | 13                 |
| 17 |                               |     |                                                                                                                                                                                                                                                                                     |                    |
| 18 |                               |     |                                                                                                                                                                                                                                                                                     |                    |
| 19 |                               |     |                                                                                                                                                                                                                                                                                     |                    |
| 20 | Dissemination policy          | 31a | Plans for investigators and sponsor to communicate trial results to participants, healthcare professionals, the public, and other relevant groups (eg, via publication, reporting in results databases, or other data sharing arrangements), including any publication restrictions | 14                 |
| 21 |                               |     |                                                                                                                                                                                                                                                                                     |                    |
| 22 |                               |     |                                                                                                                                                                                                                                                                                     |                    |
| 23 |                               |     |                                                                                                                                                                                                                                                                                     |                    |
| 24 |                               | 31b | Authorship eligibility guidelines and any intended use of professional writers                                                                                                                                                                                                      | 16                 |
| 25 |                               |     |                                                                                                                                                                                                                                                                                     |                    |
| 26 |                               | 31c | Plans, if any, for granting public access to the full protocol, participant-level dataset, and statistical code                                                                                                                                                                     | 16; trial registry |
| 27 |                               |     |                                                                                                                                                                                                                                                                                     |                    |
| 28 |                               |     |                                                                                                                                                                                                                                                                                     |                    |
| 29 | <b>Appendices</b>             |     |                                                                                                                                                                                                                                                                                     |                    |
| 30 |                               |     |                                                                                                                                                                                                                                                                                     |                    |
| 31 | Informed consent materials    | 32  | Model consent form and other related documentation given to participants and authorised surrogates                                                                                                                                                                                  | N/A                |
| 32 |                               |     |                                                                                                                                                                                                                                                                                     |                    |
| 33 |                               |     |                                                                                                                                                                                                                                                                                     |                    |
| 34 | Biological specimens          | 33  | Plans for collection, laboratory evaluation, and storage of biological specimens for genetic or molecular analysis in the current trial and for future use in ancillary studies, if applicable                                                                                      | 11                 |
| 35 |                               |     |                                                                                                                                                                                                                                                                                     |                    |
| 36 |                               |     |                                                                                                                                                                                                                                                                                     |                    |

\*It is strongly recommended that this checklist be read in conjunction with the SPIRIT 2013 Explanation & Elaboration for important clarification on the items. Amendments to the protocol should be tracked and dated. The SPIRIT checklist is copyrighted by the SPIRIT Group under the Creative Commons [“Attribution-NonCommercial-NoDerivs 3.0 Unported”](https://creativecommons.org/licenses/by-nc-nd/3.0/) license.

# BMJ Open

**Cannabinol (CBN; 30 and 300 mg) effects on sleep and next-day function in insomnia disorder ('CUPID' study): Protocol for a randomised, double-blind, placebo-controlled, crossover, three-arm, proof-of-concept trial.**

|                                 |                                                                                                                                                                                                                                                                                                                                                                                                                                                                                                                                                                                                                                                                                                                                                                                                                                                                                                                                                                                                                                                                                                                                                                                                                                                                                                                                                                                                                                                                                                                                                                                                                                                                                                                                                                                                                                                                                                            |
|---------------------------------|------------------------------------------------------------------------------------------------------------------------------------------------------------------------------------------------------------------------------------------------------------------------------------------------------------------------------------------------------------------------------------------------------------------------------------------------------------------------------------------------------------------------------------------------------------------------------------------------------------------------------------------------------------------------------------------------------------------------------------------------------------------------------------------------------------------------------------------------------------------------------------------------------------------------------------------------------------------------------------------------------------------------------------------------------------------------------------------------------------------------------------------------------------------------------------------------------------------------------------------------------------------------------------------------------------------------------------------------------------------------------------------------------------------------------------------------------------------------------------------------------------------------------------------------------------------------------------------------------------------------------------------------------------------------------------------------------------------------------------------------------------------------------------------------------------------------------------------------------------------------------------------------------------|
| Journal:                        | <i>BMJ Open</i>                                                                                                                                                                                                                                                                                                                                                                                                                                                                                                                                                                                                                                                                                                                                                                                                                                                                                                                                                                                                                                                                                                                                                                                                                                                                                                                                                                                                                                                                                                                                                                                                                                                                                                                                                                                                                                                                                            |
| Manuscript ID                   | bmjopen-2022-071148.R1                                                                                                                                                                                                                                                                                                                                                                                                                                                                                                                                                                                                                                                                                                                                                                                                                                                                                                                                                                                                                                                                                                                                                                                                                                                                                                                                                                                                                                                                                                                                                                                                                                                                                                                                                                                                                                                                                     |
| Article Type:                   | Protocol                                                                                                                                                                                                                                                                                                                                                                                                                                                                                                                                                                                                                                                                                                                                                                                                                                                                                                                                                                                                                                                                                                                                                                                                                                                                                                                                                                                                                                                                                                                                                                                                                                                                                                                                                                                                                                                                                                   |
| Date Submitted by the Author:   | 23-Jun-2023                                                                                                                                                                                                                                                                                                                                                                                                                                                                                                                                                                                                                                                                                                                                                                                                                                                                                                                                                                                                                                                                                                                                                                                                                                                                                                                                                                                                                                                                                                                                                                                                                                                                                                                                                                                                                                                                                                |
| Complete List of Authors:       | <p>Lavender, Isobel; Woolcock Institute of Medical Research, Centre for Sleep and Chronobiology; The University of Sydney Lambert Initiative for Cannabinoid Therapeutics,<br/>           McCartney, Danielle; Woolcock Institute of Medical Research, Centre for Sleep and Chronobiology; Woolcock Institute of Medical Research, Sleep and Circadian Research Group<br/>           Marshall, Nathaniel; Woolcock Institute of Medical Research, Centre for Sleep and Chronobiology; Macquarie University Faculty of Medicine and Health Sciences<br/>           Surraev, Anastasia; Woolcock Institute of Medical Research, Centre for Sleep and Chronobiology; The University of Sydney Lambert Initiative for Cannabinoid Therapeutics,<br/>           Irwin, Chris; Griffith University, Menzies Health Institute Queensland, School Allied Health Sciences<br/>           D'Rozario, Angela; Woolcock Institute of Medical Research, Centre for Sleep and Chronobiology; Macquarie University Faculty of Medicine and Health Sciences<br/>           Gordon, Christopher J.; Woolcock Institute of Medical Research, Centre for Sleep and Chronobiology; The University of Sydney Susan Wakil School of Nursing and Midwifery<br/>           Saini, Bandana; Woolcock Institute of Medical Research, Centre for Sleep and Chronobiology<br/>           Grunstein, R; Woolcock Institute of Medical Research, Centre for Sleep and Chronobiology; Royal Prince Alfred Hospital<br/>           Yee, Brendon; Woolcock Institute of Medical Research, Centre for Sleep and Chronobiology; Royal Prince Alfred Hospital<br/>           McGregor, Iain; University of Sydney, Lambert Initiative for Cannabinoid Therapeutics<br/>           Hoyos, Camilla; Woolcock Institute of Medical Research, Centre for Sleep and Chronobiology; Macquarie University Faculty of Medicine and Health Sciences</p> |
| <b>Primary Subject Heading</b>: | Research methods                                                                                                                                                                                                                                                                                                                                                                                                                                                                                                                                                                                                                                                                                                                                                                                                                                                                                                                                                                                                                                                                                                                                                                                                                                                                                                                                                                                                                                                                                                                                                                                                                                                                                                                                                                                                                                                                                           |
| Secondary Subject Heading:      | Pharmacology and therapeutics, Qualitative research, Evidence based practice, Medical publishing and peer review, Patient-centred medicine                                                                                                                                                                                                                                                                                                                                                                                                                                                                                                                                                                                                                                                                                                                                                                                                                                                                                                                                                                                                                                                                                                                                                                                                                                                                                                                                                                                                                                                                                                                                                                                                                                                                                                                                                                 |

1  
2  
3  
4  
5  
6  
7  
8  
9  
10  
11  
12  
13  
14  
15  
16  
17  
18  
19  
20  
21  
22  
23  
24  
25  
26  
27  
28  
29  
30  
31  
32  
33  
34  
35  
36  
37  
38  
39  
40  
41  
42  
43  
44  
45  
46  
47  
48  
49  
50  
51  
52  
53  
54  
55  
56  
57  
58  
59  
60

|           |                                                                               |
|-----------|-------------------------------------------------------------------------------|
| Keywords: | SLEEP MEDICINE, STATISTICS & RESEARCH METHODS, Clinical trials < THERAPEUTICS |
|           |                                                                               |

SCHOLARONE™  
Manuscripts

1  
2  
3 1 **Cannabinol (CBN; 30 and 300 mg) effects on sleep and next-day function in insomnia disorder**  
4 2 **(‘CUPID’ study): Protocol for a randomised, double-blind, placebo-controlled, crossover, three-**  
5 3 **arm, proof-of-concept trial.**  
6  
7 4  
8 5

9 6 Isobel Lavender<sup>1,2,3</sup>

10 7 Danielle McCartney<sup>1,2,3</sup>

11 8 Nathaniel S Marshall<sup>1,5</sup>

12 9 Anastasia Suraev<sup>1,2,4</sup>

13 10 Christopher Irwin<sup>6</sup>

14 11 Angela L D’Rozario<sup>1,3,5</sup>

15 12 Christopher Gordon<sup>1,8</sup>

16 13 Bandana Saini<sup>1</sup>

17 14 Ronald R Grunstein<sup>1,4,8</sup>

18 15 Brendon J Yee<sup>1,4,8</sup>

19 16 Iain S McGregor<sup>2,3</sup>

20 17 Camilla M Hoyos<sup>1,5</sup>

21 18  
22 19 <sup>1</sup>Centre for Sleep and Chronobiology, Woolcock Institute of Medical Research, Macquarie University,  
23 20 Sydney, New South Wales, Australia

24 21 <sup>2</sup>Lambert Initiative for Cannabinoid Therapeutics, Brain and Mind Centre, The University of Sydney,  
25 22 Sydney, New South Wales, Australia

26 23 <sup>3</sup>Faculty of Science, School of Psychology, The University of Sydney, Sydney, New South Wales,  
27 24 Australia

28 25 <sup>4</sup>Faculty of Medicine and Health, School of Medical Sciences, University of Sydney, New South Wales,  
29 26 Australia

30 27 <sup>5</sup>Faculty of Medicine, Health and Human Sciences, Macquarie University, Sydney, Australia

31 28 <sup>6</sup>School of Health Sciences and Social Work, Menzies Health Institute Queensland, Griffith University,  
32 29 Gold Coast, Queensland, Australia

33 30 <sup>7</sup>Susan Wakil School of Nursing and Midwifery, University of Sydney, New South Wales, Australia

34 31 <sup>8</sup>CPC-RPA clinic, Royal Prince Alfred Hospital, Sydney, New South Wales, Australia

35 32  
36 33  
37 34 **Ethics and dissemination:** Human Research Ethics Committee approval has been granted by Bellberry  
38 35 Limited (2021-08-907). Study findings will be published as open-access in a peer-reviewed journal and  
39 36 presented at academic conferences.  
40 37

41 38 **ClinicalTrials.gov Identifier:** NCT05344170  
42 39

43 40 **Correspondence**

44 41 Dr Camilla Hoyos, Woolcock Institute of Medical Research, Sydney, New South Wales, Australia.

45 42 Email: [camilla.hoyos@mq.edu.au](mailto:camilla.hoyos@mq.edu.au)  
46 43

47 44 **Word count:** 5317  
48 45  
49  
50  
51  
52  
53  
54  
55  
56  
57  
58  
59  
60

**Abstract** (277/300 words)

**Objective:** Insomnia is the most prevalent sleep disorder, with few effective pharmacotherapies. Anecdotal reports and recent preclinical research suggest that cannabitol (CBN), a constituent of *Cannabis sativa* derived from delta-9-tetrahydrocannabinol (THC), could be an effective treatment. Despite this, the isolated effects of CBN on sleep have yet to be systematically studied in humans.

**Methods:** The present protocol paper describes a randomised, double-blind, placebo-controlled, single-dose, three-arm, crossover, proof-of-concept study which investigates the effects of CBN on sleep and next-day function in 20 participants with clinician-diagnosed insomnia disorder and an Insomnia Severity Index [ISI] Score  $\geq 15$ . Participants receive a single fixed oral liquid dose of 30 mg CBN, 300 mg CBN, and matched placebo, in random order on three treatment nights; each separated by a two-week washout period. Participants undergo overnight sleep assessment using in-laboratory polysomnography and next-day neurobehavioral function tests. The primary outcome is wake after sleep onset (WASO) minutes. Secondary outcomes include changes to traditional sleep staging, sleep onset latency, and absolute spectral power during non-rapid eye movement (NREM) sleep. Tertiary outcomes include changes to sleep spindles during NREM sleep, arousal indices, absolute spectral power during rapid eye movement (REM) sleep, and subjective sleep quality. Safety-related and exploratory outcomes include changes to next-day simulated driving performance, subjective mood and drug effects, postural sway, alertness and reaction time, overnight memory consolidation, pre and post subjective and objective sleepiness, and plasma, urinary, and salivary cannabinoid concentrations. The study will provide novel preliminary data on CBN efficacy and safety in insomnia disorder, which will inform larger clinical trials. Human Research Ethics Committee approval has been granted by Bellberry Limited (2021-08-907). Study findings will be disseminated in a peer-reviewed journal and at academic conferences. ClinicalTrials.gov Identifier: NCT05344170.

**Key words:** Power Spectral Analysis; Resting Wake Electroencephalography; Psychomotor Vigilance Test; Karolinska Drowsiness Test; Karolinska Sleepiness Scale; Leeds Sleep Evaluation Questionnaire; Standard Deviation of Lateral Position; Liquid Chromatography–Mass Spectrometry.

**Strengths and limitations of the study**

- This study uses a randomised, double-blind, placebo-controlled, crossover design to investigate two active doses of CBN isolate on sleep and neurobehavioral function over ~17-hours using gold-standard objective measures, validated subjective measures, and rigorous design methodology.
- Study participants undergo extensive screening with a sleep physician to confirm insomnia disorder diagnosis, including an overnight diagnostic polysomnogram to rule out other sleep disorders that commonly co-occur with insomnia.
- The study washout period (2-weeks) was chosen to minimise participant burden, as participants cannot undergo insomnia treatment before (3-months) or during (~2 months) the protocol; however, this may lead to carry-over effects between doses as a recent crossover study demonstrated oral cannabinoids can persist in plasma for >4 weeks (1500 mg; single dose).
- The study involves a single-dose, in-laboratory proof-of-concept design and results may, therefore, lack ecological validity (repeated CBN dosing may be necessary to effectively treat insomnia).

## Background

Insomnia is a sleep disorder characterised by subjective difficulty falling asleep, maintaining sleep, and/or achieving restorative sleep, where symptoms persist for  $\geq 3$ -months and are accompanied by daytime sequelae of dysfunction and/or distress.[1] Insomnia disorder is the most prevalent sleep disorder which affects between 10–30% of adults[2] and persists in 37% of cases at 5-year follow-up.[3] Insomnia disorder increases the risk of mental and physical illnesses such as depression [4] and dementia.[5] The economic burden of insomnia disorder is estimated at  $> \$13$  billion per annum in Australia.[6]

Insomnia disorder treatments are typically behavioral or pharmacological in nature. Cognitive behavioural therapy for insomnia (CBTi) is the first-line treatment and its efficacy has been confirmed in recent meta-analyses.[7] Nevertheless, significant access barriers to CBTi exist including limited providers, high cost,[8] and delayed perception of subjective benefits.[9] CBTi may also be less effective in individuals with shorter sleep duration (i.e.,  $< 6$  hours/night).[10] As such, sedative-hypnotics are commonly used in primary care.[7] While effective in the short-term, well-documented side effects include daytime sedation, psychomotor impairment, addiction/dependence, and premature mortality.[11] There is a clear need for safe pharmacological insomnia disorder treatments.

*Cannabis sativa* is a complex plant containing numerous potentially therapeutic chemical compounds, including over 140 constituent ‘cannabinoids’.[12] As historical legal prohibitions against cannabis are relaxed, cannabinoids are being increasingly used to aid sleep.[13] The most well researched cannabinoids are  $\Delta^9$ -tetrahydrocannabinol (THC) and cannabidiol (CBD); however, in recent times, *cannabinol* (CBN) has become recognized as a putative ‘sleep-enhancing’ cannabinoid.[14] CBN is produced via the nonenzymatic oxidation of THC and is therefore present at higher concentrations in aged (rather than ‘young’) cannabis plant material.[15] This is significant as aged cannabis plant material is anecdotally reported to induce sleep.[16] CBN products are also being sold as sleep aids in unregulated markets.[17] Importantly, a recent narrative review of CBN highlighted insufficient evidence to support sleep-related claims, despite a plausible mechanism of action.

THC and CBN exert some of their physiological effects via interactions with the *endogenous cannabinoid system* (ECS)[12], comprising of signaling molecules termed ‘endocannabinoids’ (e.g., anandamide, 2-Arachidonoylglycerol [2-AG]), their receptors, and enzymes.[18, 19] The ECS is involved in regulating a myriad of biological processes including circadian rhythmicity[20]. Systematic administration of anandamide has been shown to promote sleep in rodents and humans [18, 21, 22] via activation of the cannabinoid receptor 1 (CB<sub>1</sub>R).[21, 23] As such, the CB<sub>1</sub>R is considered a promising therapeutic target.[24] The pharmacological effects of THC occur via partial agonism at CB<sub>1</sub>R[25] and can include acute intoxication, psychomotor impairment, sedation, and changes in sleep architecture.[18] CBN also has agonist actions at CB<sub>1</sub>R, albeit approximately 10-times less potent than THC[25] which may potentially account for the low levels of intoxication reported in historic CBN studies.[26, 27] Minimal intoxication could render CBN a more practical and safer alternative to THC as a sleep aid.

Two recent clinical studies administered small quantities of CBN in multi-cannabinoid formulations.[28, 29] The first, a crossover randomized controlled trial (RCT) with a one-week washout, investigated two-weeks of an oral liquid containing 20 mg THC, 2 mg CBN, and 1 mg CBD in 20 adults with insomnia disorder. The drug significantly improved insomnia disorder symptoms (Insomnia Severity Index [ISI] -5.1 points,  $p=0.0001$ ,  $d=0.94$ ) compared to placebo, with no significant changes to polysomnography (measured on night 14 of dosing).[28] In an interventional open-label

1 study, current medicinal cannabis users with subjective sleep difficulty reported improved sleep  
2 (assessed via an unvalidated subjective survey and a validated non-contact at-home tracking device)  
3 after three weeks of nightly administration of an oral capsule containing 10 mg THC and 5 mg  
4 CBN.[29] Importantly, the effects of CBN cannot be disentangled from those of THC in these studies.  
5 We are not aware of any clinical studies to-date that have tested the isolated effects of CBN on  
6 objectively measured human sleep.

7  
8 Importantly, a recently published conference abstract reported on a preclinical study in which CBN  
9 isolate (10, 30, and 100 mg/kg intraperitoneally compared with zolpidem 10 mg/kg as a positive control)  
10 increased the proportion of non-rapid eye movement (NREM) sleep and sleep bout duration 4-hours  
11 post administration in Long-Evan rats.[30] With the lowest dose, biphasic effects were observed – CBN  
12 (10mg/kg) initially decreased rapid eye movement (REM) sleep proportion; however, 4 hours after  
13 administration, a significant increase in the percentage of REM sleep occurred. These results suggest  
14 CBN could reduce wake after sleep onset (WASO), given such delayed effects on sleep.

### 15 16 Study design and aim

17 Here we described the protocol for a randomised, double-blinded, placebo-controlled, three-arm,  
18 crossover, single-site, proof-of-concept study design to investigate the acute effects of oral CBN on  
19 sleep and next-day function in 20 participants with clinician-diagnosed insomnia disorder. The primary  
20 study aim is to investigate the effects of CBN (30 and 300 mg) versus placebo on sleep in insomnia  
21 disorder. The study evaluates the safety and efficacy of CBN as a pharmacological therapy and generate  
22 preliminary data to inform larger clinical trials. Many outcome measures used in insomnia disorder  
23 clinical trials are known to be susceptible to placebo effects. A placebo control is scientifically and  
24 ethically defensible choice as the effects of CBN on human sleep are unknown and could not be properly  
25 elucidated if an active treatment such as zolpidem was the comparator rather than placebo.

### 26 27 Study outcomes

28 The primary study outcome is WASO measured in minutes using in-laboratory overnight  
29 polysomnography, from the first epoch after lights out until the last epoch, scored as any stage of sleep  
30 by an experienced polysomnographic technician in accordance with American Academy of Sleep  
31 Medicine (AASM) 2020 Sleep Scoring criteria (Version 2.6).[31] Secondary study outcomes include:

- 32 1. Traditional sleep staging: Proportion of the sleep opportunity scored at the 5 stages (wake,  
33 and N1, N2, N3, and REM sleep) between lights out and lights on, measured using overnight  
34 in-laboratory polysomnography, scored by a polysomnography technician in accordance with  
35 AASM Sleep Scoring criteria.
- 36 2. Sleep Onset Latency (SOL): SOL measured in minutes using in-laboratory polysomnography,  
37 calculated from the time of lights out to the first sleep epoch as scored by a polysomnographic  
38 technician in accordance with AASM Sleep Scoring criteria.
- 39 3. Absolute Electroencephalographic (EEG) Power During NREM Sleep: Spectral power of  
40 delta (1-4.5 Hz), theta (4.5-8 Hz), alpha (8-12 Hz), sigma (12-15 Hz), beta (15-25 Hz), and  
41 gamma (25-40 Hz) frequency ranges between treatment arms. Power spectral analysis will be  
42 applied to EEG signals from polysomnography after artefacts are detected and removed.

43 Tertiary, safety, and exploratory study outcomes are described in Box 1 (see ClinicalTrials.gov  
44 Identifier: NCT05344170).



1 Box 1. *Tertiary, safety, and exploratory study outcomes***Tertiary outcomes**

1. **Sleep Spindles During Non-Rapid Eye Movement (NREM) Sleep:** Sleep spindle and slow oscillation events in NREM sleep from in-laboratory overnight polysomnography. A sleep spindle and slow oscillation detection algorithm will be applied to electroencephalography (EEG) signals from polysomnography after artefacts are detected and removed. Comparisons between each CBN dose versus placebo.
2. **EEG Arousal Index:** Number of cortical arousals captured via the electroencephalogram per hour of sleep scored by the polysomnographic technician on the polysomnogram in accordance with AASM Sleep Scoring criteria. Comparisons between each CBN dose versus placebo.
3. **Absolute EEG Power During Rapid Eye Movement (REM) Sleep:** Spectral power of delta (1-4.5 Hz), theta (4.5-8 Hz), alpha (8-12 Hz), sigma (12-15 Hz), beta (15-25 Hz), and gamma (25-40 Hz) frequency ranges between treatment arms. Power spectral analysis will be applied to EEG signals from polysomnography after artefacts are detected and removed. Comparisons between each CBN dose versus placebo.
4. **Next-Day Post Wake Subjective Sleep Evaluation (LSEQ):** RCSQ score. LSEQ score. LSEQ scores range from 0-100, with higher scores indicating better subjective experience. Assessed within 1 h after wake (comparison between each CBN dose versus placebo).
5. **Next-Day Post Wake Subjective Sleep Evaluation (RCSQ):** RCSQ score. RCSQ scores range from 0-100, with higher scores indicating better subjective experience. Assessed within 1 h after wake (comparison between each CBN dose versus placebo).

**Safety outcomes**

1. **Standard Deviation of Lateral Position (SDLP) During Next-day Post-Wake Simulated Drive:** SDLP ("weaving") is measured across the 'standard', 'car following', and 'divided attention' sub-sections of a ~30 minute simulated driving task. Assessed within 2 h after wake (comparison between each CBN dose versus placebo)
2. **Speed During Next-day Post-Wake Simulated Drive:** Average speed and standard deviation of speed is measured across the 'standard' and 'divided attention' sub-sections of a ~30 minute simulated driving task. Assessed within 2 h after wake (comparison between each CBN dose versus placebo).
3. **Distance Headway During Next-day Post-Wake Simulated Drive:** Average distance headway (i.e., distance between the driver's vehicle and vehicle immediately in front) and standard deviation of distance headway is measured across the 'car following' sub-section of a ~30-minute simulated driving task. Assessed within 2 h after wake at both treatment sessions (comparison between each CBN dose versus placebo).
4. **Subjective Mood Evaluation:** The Abbreviated Profile of Mood States (POMS) consists of 40 items measuring domains of 'tension', 'depressed', 'anger', 'vigour', 'fatigue', and 'concentration'. Participants respond to each item using 5-point Likert scales ranging from 0 (Not at all) to 4 (Extremely). A total mood disturbance score is calculated by summing negative domains and subtracting positive domains. Administered pre and post drug administration, as well as next-day (comparison between each CBN dose versus placebo).
5. **Subjective Drug Effects:** The Drug Effects Questionnaire (DEQ) assesses the extent to which participants feel a drug effects, feel high, like the effects, dislike the effects, want more of the substance, and feel sedated, on self-rating 100mm visual analogue scales. A total mood disturbance score is calculated by summing negative domains and subtracting positive domains. Administered pre and post drug administration, as well as next-day (comparison between each CBN dose versus placebo).
6. **Postural Sway:** Centre-of-pressure (COP) during computerised static posturography. Administered pre and post drug administration, as well as next-day (comparison between each CBN dose versus placebo).
7. **Behavioural Alertness and Reaction Time:** Psychomotor Vigilance Test (PVT) is administered twice the next-day (comparison between each CBN dose versus placebo).

8. **Overnight Verbal Declarative Memory Consolidation:** Word pair recall scores measured using the computerised Word Pairs Task (WPT). Administered pre-drug administration and next-day (comparison between each CBN dose versus placebo).
9. **Overnight Procedural Memory Consolidation:** Motor sequence learning measured using the computerised Finger Tapping Task (FTT). Administered pre-drug administration and next-day (comparison between each CBN dose versus placebo).
10. **Resting Wake EEG Power After Sleep:** Resting wake EEG power during the Karolinska Drowsiness Test (KDT) upon wake: delta (1-4.5 Hz), theta (4.5-8 Hz), alpha (8-12 Hz), sigma (12-15 Hz), beta (15-25 Hz), and gamma (25-40 Hz) frequency ranges. Power spectral analysis is applied to EEG signals from polysomnography, after artefacts are detected and removed. Comparison between each CBN dose versus placebo.
11. **Subjective Sleepiness After Sleep:** The Karolinska Sleepiness Scale (KSS) is a 10-item measure of subjective drowsiness. Participants respond to each item using a 9-point Likert scale ranging from 1 (Extremely alert) to 9 (Extremely sleepy). Higher scores are indicative of increased drowsiness. The KSS will be collected in accordance with the KDT protocol but will not be analysed due to insufficient statistical power.

### Exploratory outcomes

1. **Resting Wake Electroencephalography (EEG) Power Before Sleep** (Acute Effects of CBN). Resting wake EEG power during the KDT prior to sleep: delta (1-4.5 Hz), theta (4.5-8 Hz), alpha (8-12 Hz), sigma (12-15 Hz), beta (15-25 Hz), and gamma (25-40 Hz) frequency ranges. Power spectral analysis is applied to EEG signals from polysomnography, after artefacts are detected and removed. Comparison between each CBN dose versus placebo.
2. **Subjective Sleepiness Before Sleep** (Acute Effects): The KSS is a 10-item measure of subjective drowsiness. Participants respond to each item using 9-point Likert scales ranging from 1 (Extremely alert) to 9 (Extremely sleepy). Higher scores are indicative of higher drowsiness. The KSS will be collected in accordance with the KDT protocol but will not be analysed due to insufficient statistical power.
3. **Plasma Cannabinoid Concentrations:** Presence of cannabinoids (CBN, delta-9-tetrahydrocannabinol [THC], and cannabidiol [CBD]) (e.g., 11-OH-CBN, 11-COOH-CBN, 11-OH-THC, 11-COOH-THC, 7-OH-CBD, 7-COOH-CBD), and endocannabinoids and related molecules (e.g., 2-Arachidonoylglycerol and anandamide) and their metabolites in plasma samples.
4. **Urinary Cannabinoid Concentrations:** Presence of cannabinoids (CBN, THC, and CBD) and their metabolites (11-OH-CBN, 11-COOH-CBN, 11-OH-THC, 11-COOH-THC, 7-OH-CBD, 7-COOH-CBD) in urine samples.
5. **Salivary Cannabinoid Concentrations:** Presence of cannabinoids (THC, CBN) and their metabolites (11-OH-CBN, 11-COOH-CBN, 11-OH-THC, 11-COOH-THC) in saliva samples.

### Safety

The investigational product, CBN, is currently a Schedule 9 'Prohibited Substance' in Australia.[32] The safety profile of CBN can be inferred from human studies conducted between 1973 and 1987. These studies explored oral doses up to 1200 mg CBN with some administering repeated daily doses of CBN for up to 4 weeks.[26, 33-35] There were no notable safety concerns, aberrations or toxicity concerns from these studies, with no adverse changes in parameters such as heart rate, blood pressure, body temperature, respiratory rate, perception, intoxication and postural stability.[26, 33-35] None of these studies measured sleep, sedation, or residual next-day effects of CBN (such as adverse effects on driving performance and cognitive function). These measures are obtained in the current study. CBN is currently being investigated as an analgesic agent (ClinicalTrials.gov Identifier: NCT03675971) and topical treatment for epidermolysis bullosa (ClinicalTrials.gov Identifier: NCT04908215). An RCT of oral CBN isolate (compared with combination CBN/CBD and placebo doses) on the subjective sleep

1 of healthy adults was retrospectively registered in May 2022 (ClinicalTrials.gov Identifier:  
2 NCT05839964). We will monitor and review safety reports from these trials as they become available.

## 3 4 **Methods**

### 5 6 **Participants, interventions, and outcomes**

#### 7 Trial setting

8 The trial Sponsor and site is the Woolcock Institute of Medical Research, a specialist sleep and  
9 respiratory research institute and clinic (Sydney, Australia). The study funder is the Lambert Initiative  
10 for Cannabinoid Therapeutics, University of Sydney (Sydney, Australia), a philanthropically funded  
11 centre for cannabinoid science. Recruitment commenced in August 2022 and is anticipated to conclude  
12 in late 2023. The first participant was enrolled the 24<sup>th</sup> of August 2022 and the first participant was  
13 randomised on the 13<sup>th</sup> of October 2022. The study has ethical approval from Bellberry Limited Human  
14 Research Ethics Committee (HREC; 2021-08-907; Version 2.1, 01-Aug-2022) and is registered on  
15 ClinicalTrials.gov (Identifier: NCT05344170; 25-April-2022). The clinical trial protocol is available on  
16 request. Significant changes to the study protocol will be documented on ClinicalTrials.gov. The study  
17 protocol was developed according to the Standard Protocol Items: Recommendations for Interventional  
18 Trials (SPIRIT) 2013 statement.[36] The Therapeutics Goods Administration (TGA) has acknowledged  
19 the use of CBN in this study through the Clinical Trial Notification (CTN) scheme (CTN Number: CT-  
20 2022-CTN-00543-1).

#### 21 22 Participant eligibility

23 Eligible participants are aged between 25-65 years with physician diagnosed insomnia disorder as per  
24 the International Classification of Sleep Disorders-3 (ICSD-3)[37] and Diagnostic and Statistical  
25 Manual of Mental Disorders, Fifth Edition (DSM-5)[38] criteria as determined by the study physician  
26 (see Box 2). The age range was selected to minimise age-related changes to sleep architecture.[39] As  
27 cannabinoids have been shown to improve symptoms (e.g., anxiety, pain) that commonly impair sleep  
28 (i.e., causing ‘secondary’ insomnia disorder),[40] a ‘primary’ insomnia disorder population is being  
29 recruited for this study.

### 30 31 **Box 2**

#### 32 *Inclusion and exclusion criteria for study participants*

Eligible individuals must fulfill the following criteria:

1. Between 25 – 65 years of age
2. Insomnia Severity Index (ISI) score  $\geq 15$  at eligibility screening
3. Insomnia disorder (symptoms occurring at least 3 times per week and present for longer than 3 months) as determined by the study physician
4. Ability to take oral medication
5. Provision of signed and dated informed consent form
6. Stated willingness to comply with all study procedures and availability for the duration of the study

Individuals who meet any of the following criteria are ineligible to participate in the study:

1. Medical condition or medication that is the cause of the insomnia disorder as determined by the study physician
2. Known hypersensitivity to cannabis or cannabinoid products (including if this becomes evident during the trial)

3. Reported use of cannabis or cannabinoid products within the past 3 months as confirmed by at least one negative urine drug screen (UDS) (or at the study physician's discretion)
4. Sleep apnoea (defined as Apnoea Hypopnea Index [AHI] >15 and Oxygen Desaturation Index [ODI]>10) as confirmed by polysomnography at screening
5. Sleep-related movement disorder as determined by the study physician
6. Delayed or advanced sleep phase syndrome (based on actigraphy and sleep diary) as confirmed during screening
7. Any medical condition that produces an abnormal EEG (i.e., epilepsy, brain injury)
8. Clinically relevant cardiovascular abnormalities as determined by the study physician and a 12-lead electrocardiogram (ECG) at screening
9. Shift work or trans meridian travel (two time zones) within the last month
10. History of major psychiatric disorder in the past 12 months at the study physician's discretion, except clinically managed mild depression and/or anxiety
11. History of suicide attempt or current suicide ideation (score greater than 1 on Q9 of the Patient Health Questionnaire [PHQ-9])[41]
12. Pregnancy or lactating. Female participants are required to complete a urine pregnancy test at screening and treatment sessions and all participants are instructed to use a reliable form of contraception throughout the study duration
13. History of drug or alcohol dependency or abuse within approximately the past 2 years
14. Use of CNS-active drugs (cannabis, amphetamines, cocaine, antidepressants, opioids, benzodiazepines) in the past 3 months as confirmed by a positive urine drug test at screening or at the study physician's discretion
15. Use of medications that may have a clinically significant impact upon the metabolism and excretion of cannabinoids as determined by the study physician (e.g., CYP450 enzyme inducers/inhibitors)
16. Excessive caffeine use that in the opinion of the study physician contributes to the participant's insomnia disorder, or the inability to abstain from caffeine use 24 hours prior to each overnight sleep study
17. Inability to refrain from alcohol consumption 24 hours prior to each overnight sleep study
18. Individuals with nicotine dependence (i.e., daily smokers)
19. Medical conditions that result in frequent need to get out of bed (e.g., sleep walking, nocturia)
20. Psychological or behavioural treatment for insomnia disorder, including cognitive behavioural therapy for insomnia, within 3 months before screening (excluding sleep hygiene advice)
21. Occupational or judicially ordered drug screening
22. Has held an unrestricted driving license <1 year
23. Cannot speak English fluently

## **Patient and Public Involvement**

Patients and/or the public were not involved in the design, conduct, reporting, nor dissemination plans of this research.

## **Intervention**

### Study doses

Participants receive a single fixed 2 mL oral liquid dose of: (1) 30 mg CBN ('ECS310' 1.5% containing 15 mg/mL CBN); (2) 300 mg CBN ('ECS310' 15% containing 150 mg/mL CBN); and (3) matched placebo. Treatments are administered across three separate overnight Treatment Sessions in randomised order two-hours prior to habitual lights out. The lower dose was selected to match the CBN products

1 available in the United States and supported by customer testimonies.[17] The higher dose was  
2 informed by a preclinical study of CBN isolate and sleep.[30]

### 3 4 Investigational product

5 The investigational drug ('ECS310') is a liquid formulation of CBN suspended in medium chain  
6 triglyceride (MCT) oil. The placebo contains MCT oil only. The maximum detectable THC content of  
7 the active investigational products is  $\leq 150 \mu\text{g}$ . Neither the study drug nor matched placebo contain any  
8 other cannabinoids or terpenes/terpenoids. The study drug and matched placebo are expected to be  
9 identical in their visual appearance, taste, and smell. The MCT oil contains paprika oleoresin colorant  
10 to ensure the double-blind is maintained and prevent oxidation. The Sponsor purchased the  
11 investigational product from BOD Australia (Sydney, Australia), who sourced investigational products  
12 from Medropharm (Zürich, Switzerland). Stability studies supporting the shelf life applied to the drug  
13 product were conducted in accordance with the International Conference on Harmonization (ICH)  
14 Guideline Q1A Stability Testing of new Drug Substances and Products and are ongoing. The CBN  
15 solution stability is 24 months at 15-25°C, 60% humidity, and away from sunlight.

### 16 17 Recruitment and retention

18 We aimed to recruit 20 participants over an 18-month period. The sample size was selected with  
19 consideration for practical factors such as time, cost, and resource allocation (rather than using formal  
20 statistical techniques) as it is pilot in nature. Participants are recruited from social media, the Woolcock  
21 Institute Volunteer Database, and locally displayed physical study advertisements. Participants are  
22 reimbursed a fixed amount equivalent to that used in previous clinical trials with similar participant  
23 involvement and loss of working hours.[42] To encourage retention, participants receive reimbursement  
24 upon completion of the final Treatment Session. Study advertisements include an embedded link and  
25 QR code to the study website (described below).

### 26 27 Eligibility screening

28 Eligibility assessment is performed in three steps undertaken by the study team at the Woolcock  
29 Institute of Medical Research (see Figure 1 *Study Flow Diagram*):

- 30 1. *On-line and telephone pre-screening.* Interested individuals are directed to the study webpage.  
31 They provide electronic consent before completing an online pre-screening questionnaire to  
32 assess initial eligibility (e.g., age, location, ISI score, transmeridian travel, shift work).  
33 Potentially suitable individuals can enter their contact details and are provided the Participant  
34 Information Statement so that the trial coordinator may conduct a brief telephone interview  
35 before scheduling screening appointments. Individuals deemed unsuitable are provided with  
36 support resources.
- 37 2. *Screening visit 1.* Willing and potentially suitable participants attend an on-site medical  
38 screening. The study physician obtains written informed consent before conducting a screening  
39 interview to compile medical history, assess suitability against study eligibility criteria (Box  
40 2), and diagnose insomnia disorder (ICSD-3[37] and DSM-V[38]). The following validated  
41 self-report questionnaires are used to evaluate eligibility: ISI,[43] a measure of insomnia  
42 disorder symptom severity over the past two-weeks; Epworth Sleepiness Scale (ESS),[44] a  
43 measure of sleep propensity in daily life; Hospital Anxiety and Depression Scale (HADS),[45]  
44 a measure of anxiety and depression; and, the Patient Health Questionnaire-9 (PHQ-9),[41] an  
45 instrument for screening and monitoring the severity of depression and suicidal ideation. An  
46 electrocardiogram (ECG) and urinary screen (pregnancy and recent alcohol, cannabis, cocaine,  
47 benzodiazepines, opiates, or amphetamines, use) are also conducted. Participants must agree to



- 1 the study protocol, including use of contraception and refraining from driving until the day after  
2 Treatment Session discharge.
- 3 3. *Screening visit 2.* Participants are required to complete a clinical overnight polysomnography  
4 to rule out the presence of other sleep disorders (obstructive sleep apnoea or sleep-related  
5 movement disorder, see Box 2). Diagnostic polysomnography results within the previous 12-  
6 months may be used where weight has not changed substantially in that time (at discretion of  
7 the study physician). Diagnostic sleep studies are scored by an experienced sleep technician[46]  
8 and reviewed by the study physician.

9  
10 Insert Figure 1 here

11  
12 **Figure 1.** *Study flow diagram*

13  
14 **Randomisation, allocation concealment, and blinding**

15 Participants are allocated to one of six possible treatment orders in a 1:1:1:1:1:1 ratio using a pre-  
16 populated randomisation schedule generated by the study epidemiologist (NSM). The six-orders  
17 constitute a balanced Latin square. Sequences were computer-generated and are stored in a password-  
18 protected system inaccessible to blinded study personnel (centralised computerised randomisation).  
19 Allocation concealment is managed by the unblinded study epidemiologist and an independent staff  
20 member who do not have any contact with participants, nor involvement in day-to-day trial activities.  
21 A study physician may request to be unblinded in the event of a medical emergency. Participants who  
22 are enrolled in the study, but not yet randomised, are assigned a unique screening number.  
23 Randomisation occurs at the outset of the first Treatment Session assuming participant eligibility  
24 persists. Working under the study physician, the trial coordinator records the decision to randomise the  
25 patient. The study database then issues an irrevocable randomisation number for that participant.  
26 Investigational product is stored in opaque sequentially numbered containers labelled with the patient  
27 randomisation and Treatment Session number to maintain blinding of all patients, staff, and outcome  
28 assessors. The drug manufacturer packaged and labelled the investigational product according to the  
29 randomisation list generated by the study epidemiologist.

30  
31 **Pre-Treatment Session procedures**

32 Participants are asked to maintain a regular sleep-wake schedule (i.e., lights out between 22-23:00 each  
33 evening) for one week prior to each Treatment Session. Participants wear a wrist-worn actigraphy  
34 monitor (GENEActive, Activinsights, United Kingdom) and complete a daily sleep diary (Karolinska  
35 Sleep Diary [KSS][47] modified to capture additional information, such as naps, alcohol/caffeine  
36 consumption, and GENEactiv removal times) throughout this period. If the sleep schedule is  
37 significantly irregular during the 7-night leadup (e.g., > 2 hours on > 2 nights), the principal medical  
38 and non-medical investigators may reschedule the visit. Participants are required to abstain from  
39 consuming cannabis, cannabinoids, and other CNS-active drugs throughout the entire study; and avoid  
40 alcohol and caffeine 24 hours prior to Treatment Sessions. Urinary drug, alcohol (DrugCheck NxStep  
41 OnSite, USA), and pregnancy (SureStep, Germany) screening occurs at the outset of each Treatment  
42 Session.

43  
44 **Treatment Session procedures**

45 Participants arrive at the Woolcock Sleep Clinic in the early evening (~17:00-18:00 depending on  
46 habitual lights out), where they remain until late morning (~10-11:00) the following day, as per the  
47 Treatment Session schedule in Figure 2. Standardised meals are provided. All Treatment Sessions are  
48 separated by a washout period of  $\geq 2$ -weeks to minimise carry-over effects between doses.[48]

1  
2  
3 1 Study drug administration

4 2 After a brief medical examination, the study physician prescribes and dispenses the study drug, drawing  
5 3 a fixed 2 mL volume of liquid into a pre-labelled amber plastic syringe. Participants self-administer the  
6 4 randomly allocated study drug 2-hours prior to lights out. The trial coordinator observes drug  
7 5 administration to ensure accuracy of dosing. The dose is documented in participant records and  
8 6 accountability logs. Timing of administration has been informed by delayed onset of effects observed  
9 7 with oral dosing of other cannabinoids[49] and delayed effects observed in a preclinical study of  
10 8 CBN.[30]  
11 9

12  
13  
14 10 **Data collection**

15 11 Study measures are described below (see Table 1).  
16  
17  
18  
19  
20  
21  
22  
23  
24  
25  
26  
27  
28  
29  
30  
31  
32  
33  
34  
35  
36  
37  
38  
39  
40  
41  
42  
43  
44  
45  
46  
47  
48  
49  
50  
51  
52  
53  
54  
55  
56  
57  
58  
59  
60

For peer review only

1 **Table 1.** A summary of assessments completed throughout the investigation.

| Measure (ordered first to last)                  | Screening | Treatment Session 1-3    |       |     |
|--------------------------------------------------|-----------|--------------------------|-------|-----|
|                                                  |           | At-home sleep monitoring | Night | Day |
| Informed consent                                 | ●         |                          |       |     |
| Medical examination                              | ●         |                          | ●     |     |
| Baseline questionnaires (ISI, ESS, HADS & PHQ-9) | ●         |                          |       |     |
| Electrocardiogram                                | ●         |                          |       |     |
| Urinary drug and alcohol screen                  | ●         |                          | ●     |     |
| Pregnancy test                                   | ●         |                          | ●     |     |
| Overnight polysomnography (clinical EEG)         | ●         |                          | ●     |     |
| Actigraphy                                       |           | ●                        |       |     |
| Sleep diary (KSD)                                |           | ●                        |       |     |
| Oral fluid drug screen (Securetech DrugWipe)     |           |                          | ●     | ●   |
| Quantisal saliva collection                      |           |                          | ●     | ●   |
| Blood plasma collection                          |           |                          | ●     | ●   |
| Urine collection                                 |           |                          | ●     | ●   |
| Mood (POMS)                                      |           |                          | ●     | ●   |
| Drug effects (DEQ)                               |           |                          | ●     | ●   |
| Balance (posturography)                          |           |                          | ●     | ●   |
| Memory (FTT & WPT)                               |           |                          | ●     | ●   |
| KDT with EEG                                     |           |                          | ●     | ●   |
| Sleep questionnaires (LSEQ, RCSQ, & KSS)         |           |                          |       | ●   |
| Simulated driving performance                    |           |                          |       | ●   |
| PVT                                              |           |                          |       | ●   |

2  
3  
4  
5  
6  
7  
8  
9  
10  
11  
12  
13  
14  
15  
16  
17  
18  
19  
20  
21  
22  
23  
24  
25  
26  
27  
28  
29  
30  
31  
32  
33  
34  
35  
36  
37  
38  
39  
40  
41  
42  
43  
44  
45  
46  
47  
48  
49  
50  
51  
52  
53  
54  
55  
56  
57  
58  
59  
60

*Note.* DEQ=Drug Effects Questionnaire; EEG=electroencephalography; ESS=Epworth Sleepiness Scale; FTT=Finger Tapping Task; HADS=Hospital Anxiety Depression Scale; ISI=Insomnia Severity Index; KSD=Karolinska Sleep Diary; KSS, Karolinska Sleepiness Scale; LSEQ= Leeds Sleep Evaluation Questionnaire; PHQ-9=Patient Health Questionnaire-9; POMS=Profile of Mood States; PSG=polysomnography; PVT=Psychomotor Vigilance Task; RCSQ=Richard Campbell Sleep Questionnaire; WPT=Word Pairs Task.

Insert Figure 2 here

**Figure 2.** Schedule of events during each Treatment Session.

*Note.* DEQ=Drug Effects Questionnaire; EEG=electroencephalography; FTT=Finger Tapping Task; ISI=Insomnia Severity Index; KSD=Karolinska Sleep Diary; KSS=Karolinska Sleepiness Scale; LSEQ= Leeds Sleep Evaluation Questionnaire; POMS=Profile of Mood States; POST=Posturography; PSG=polysomnography; PVT=Psychomotor Vigilance Task; RCSQ=Richard Campbell Sleep Questionnaire; UDS=Urinary Drug Screen; WPT=Word Pairs Task.



### Blood collection and plasma cannabinoid levels

Venous blood samples are taken at baseline (~17:00) and approximately 13-hours post administration (~08:45). Samples are drawn into EDTA vacutainers (Becton, Dickinson and Company, New Jersey, USA) and centrifuged (2500×g for 15 min at 4°C). Supernatant plasma is aliquoted into 1.5 mL Eppendorf Tubes and stored at -80°C in the Woolcock Institute of Medical Research until study completion when samples will be transferred to the Lambert Initiative Laboratory. Samples will undergo liquid chromatography–mass spectrometry (LC–MS/MS) analysis, using previously published methodology.[50-52] Plasma will be analysed for cannabinoids (e.g., CBN, THC, CBD), their metabolites (e.g., 11-OH-CBN, 11-COOH-CBN, 11-OH-THC, 11-COOH-THC, 7-OH-CBD, 7-COOH-CBD), and endocannabinoids and related molecules (e.g., 2-AG and anandamide). THC and CBD and their metabolites are being tested to verify abstinence from common cannabinoids, notwithstanding the trace quantities of THC that the investigational product may contain ( $\leq 150 \mu\text{g}/2\text{ml}$ ).

### Urine collection and urinary cannabinoid levels

Urine collection occurs at baseline (~17:00), and approximately 90-minutes (~21:30), 11-hours (~07:00), and 14-hours (~10:00) post drug administration. Urine (~6 mL) is aliquoted into 1.5 mL Eppendorf Tubes and stored at -80°C before being transferred to the Lambert Initiative Laboratory for quantification of cannabinoids (primarily THC, CBD and CBN) and their metabolites (11-OH-CBN, 11-COOH-CBN, 11-OH-THC, 11-COOH-THC, 7-OH-CBD, 7-COOH-CBD), and endocannabinoids at study completion. LC–MS/MS analyses will be conducted using our previously described methods .[50, 51] It is important to conduct urinary analyses to further characterise the pharmacokinetic profile of CBN, which is currently not well described.

### Salivary drug testing

Oral fluid testing occurs at baseline (~17:00), and at approximately 75-minutes (~21:15) and 13-hours (~08:55) post drug administration using the DrugWipe® 5S (DW5s; Securetec, Neubiberg, Germany) and Quantisal™ collection (Immunoanalysis, Pomona, CA) devices. The DW5s collects oral fluid (approximately 10–20  $\mu\text{L}$ ) from the tongue. The DW5s is commonly used in routine roadside drug tests; however, demonstrates variable sensitivity (22-89%), specificity (50-100%), and accuracy (53-94%).[53] While the investigational product contains negligible quantities of THC, similarities in chemical structure between CBN and THC may conceivably lead to false-positive test results that would be a concern should CBN become widely used by patients.[54] As such, the Quantisal™ device is used to collect oral fluid from participants (~1 mL) which will be used in LC–MS/MS quantification of cannabinoid (CBN and THC) and metabolite concentrations. Samples are placed in a stabilising buffer and stored at 4°C before being transferred to the Lambert Initiative analytical chemistry laboratory for analysis. Analyses occur within three-months of collection.

### Cognitive and psychomotor performance

Overnight declarative and procedural memory consolidation is assessed at each Treatment Session using the Word Pairs Task [WPT] and Finger Tapping Task [FTT], respectively. For both tasks, memory encoding during a learning phase occurs prior to drug administration (~19:15-20:00) with next-day retest (~09:00). As THC can acutely impair cognitive function and memory, it is necessary to examine CBN effects in this regard. Contrary to oral dosing studies, in one study, CBN reportedly caused a mild intoxication when administered intravenously at high doses (1.2mg/min)[27]. To investigate possible intoxication-induced bodily sway, postural balance ('posturography') is being measured using the stabilometric balance platform (Advanced Medical Technologies Inc., AccuSwayPLUS Balance platform, MA, USA), which measures centre of pressure in anterior-posterior

(y-axis) and medial-lateral (x-axis) directions using four strain gauge load cells at the bottom of the device. Centre of pressure is assessed in eyes open and eyes closed conditions. Postural balance assessment takes < 5 minutes to complete and is repeated 3 times (i.e., baseline, 60-minutes post drug administration, and next-day ~09:30 hours). The psychomotor vigilance test (PVT) is a commonly used reaction time based measure of attention and fatigue related changes in alertness[55] involving a hand-held box with a red-light emitting diode display of a three-digit millisecond counter (PVT-192, Ambulatory Monitoring Inc, Adley, NY, USA). During the 10-minute task, participants are instructed to respond as quickly as possible to stimuli appearing at variable intervals (ranging 2-10 seconds). The PVT is repeated twice during next-day testing (~09:00 and ~10:00 hours).

#### Self-report questionnaires

Mood is evaluated using the Profile of Mood States (POMS; 40-items with 5-point Likert scales)[56] questionnaire, a commonly used rating scale of transient and distinct moods. The Drug Effects Questionnaire (DEQ; 7-items with unipolar 100 mm visual analogue scales [VAS])[57] is used to evaluate subjective drug effect; including strength of drug effect, feeling stoned ('high'), liking/disliking the drug effect, feeling sedated, and feeling anxious. The POMS and DEQ are completed at baseline, ~1-hour post drug administration (~21:00), and the next-day (~09:30). The Leeds Sleep Evaluation Questionnaire (LSEQ; 10-items with 100 mm VAS)[58] is a validated measure of the previous night's sleep quality (sleep onset, maintenance, and quality; including behaviour following waking) in comparison to usual. The Richard Campbell Sleep Questionnaire (RCSQ; 5-item with 100 mm VAS)[59] is used to measure perceived sleep depth, sleep latency (time to fall asleep), number of awakenings, and sleep efficiency and quality. The LSEQ and RCSQ are administered upon wake (~06:15 hours).

#### Subjective and objective sleepiness

Karolinska Sleepiness Scale (KSS) and Karolinska Drowsiness Test (KDT) are used to measure subjective and objective sleepiness, respectively.[60] The KSS is a single-item rating scale assessing current sleepiness, ranging from 1 (*Extremely alert*) to 9 (*Extremely sleepy – fighting sleep*). KSS scores are typically compared to the objective drowsiness ascertained using the KDT. During the KDT, resting awake EEG is measured while participants focus on a wall marker, with eyes open and closed across 2-minute intervals. The KSS and KDT are administered immediately prior to sleep (~22:00 hours) and upon wake (~06:00 hours).

#### Polysomnography

Sleep is assessed using polysomnography (Grael polysomnography, Compumedics, USA), a multiparametric tool used for monitoring and diagnosing sleep disorders. Polysomnography consists of 18 channels recording biophysical changes that occur during sleep, including brain activity (via EEG); muscle activity or skeletal muscle activation (electromyography); eye movement (electrooculogram); cardiac function (ECG); respiratory effort using chest and abdominal belts; and digital pulse oximetry. To improve participant comfort/retention, the pulse oximeter, nasal cannula, and thermistor are only used during screening to detect sleep disordered breathing (Visit 2). Polysomnography equipment is fitted by an experienced sleep technician prior to sleep and is removed the next morning once the KDT has been completed. Sleep and associated events are scored according to AASM 2020 criteria in 30 second epochs.[46] Each patient's three polysomnograms are scored by the same sleep technician blinded to treatment allocation. For quantitative EEG analyses, sleep and KDT polysomnography recordings will be processed using a previously validated automated artefact detection program.[61, 62] Power spectral and spindle analyses will be derived from artefact-free epochs in central channels using previously published methodology.[61, 62]

### Simulated driving performance

Next-day driving performance is measured at ~08:00 using a fixed-based driving simulator (Hyperdrive, Adelaide, Australia) equipped with standard vehicle controls (described elsewhere[42, 48]) and using custom-built scenario developed using the SCANeR Studio Simulation Engine (version 2022.2 r25, AVSimulation, Paris, France). The 30-minute driving scenario incorporates three independent epochs: (1) a ‘car following’ drive (~7 minutes duration) that closely resembles one that has previously demonstrated sensitivity to THC-induced impairment;[63] (2) a ‘highway’ drive (~17 minutes duration); and (3) a novel divided-attention drive (~6 minutes duration), designed to replicate a casual mobile-phone conversation that does not require mental rehearsal.[64] During the divided-attention task, pre-recorded five-word sentences are played every 10 seconds (through a hands-free speaker). Participants immediately indicate whether the sentence was sensical (e.g., “*the truck delivered the package*”) or non-sensical (e.g., “*the octopus burned the onions*”) in nature then; and at 7-seconds, they are asked to recall the last word in the sentence. The main outcome measure for all epochs of the driving task is SDLP, a widely used measure of lateral vehicular control that is sensitive to drug and alcohol effects. Previous reports show a dose-dependent increase in SDLP with THC (higher represents more erratic driving), particularly in occasional cannabis users.[63, 65] Secondary outcomes for each driving epoch include: (epoch 1) average and standard deviation of car-following headway (i.e., distance relative to car in front) and speed coherence (i.e., correlation between speed of lead and following car); (epochs 2 and 3) average speed, and standard deviation of speed (SDSP). The driving scenarios were programmed by investigator C.I.

### **Adverse events**

Safety outcome measures are described above. Blood pressure is measured four times during each Treatment Session (~17:00, 18:45, 21:00, and 09:30). Adverse event collection occurs via standardised interview at three timepoints (prior to discharge, and 7-hours and 7-days post discharge). Passive adverse event collection occurs throughout the study protocol via open-ended interview and is recorded on paper form. A study physician assesses the severity and causality of each adverse event.

### **Post-Treatment Session care**

Participants leave the research facility at approximately 10:00-11:00 and are contacted by the study coordinator that evening (~16:30), and 7-days later, to assess wellbeing and record adverse events (including changes to sleep). Upon study completion, if deemed necessary in the study physician’s opinion, a clinical follow-up is arranged for participants on an individual basis.

### **Data management**

Any information obtained for the purpose of this research that could identify participants is treated as confidential and securely stored adhering to guidelines of the Sponsor, HREC, NHMRC National Statement on Ethical Conduct in Human Research (2007) and Note for Guidance on Good Clinical Practice (CPMP/ICH-135/95). All onboarding, consent, and questionnaire data is captured through SPARDAC™ (Single Page Application - Research Data Capture) developed by Wappsystem Pty Ltd and hosted on Amazon Web Services in Sydney, NSW. Participant data is identified by unique codes. The code linking participant data to identity (e.g., name, date of birth, contact details) is stored securely with password protection, and is not accessible via the internet. Paper files are stored in locked storage cabinets on-site. Digital participant data are stored on a secure electronic data system, that is regularly backed up with disaster recovery features. All data will be stored securely for at least 15 years. Only study investigators have access to participant data. Data monitoring occurs on a regular basis by the study investigators. Data integrity is being enforced through a variety of mechanisms including data rules, range checks, and consistency checks against data already stored in the database. Written

1  
2  
3 1 documentation of changes are available through electronic logs and audit trails. Study safety is  
4 2 internally monitored and evaluated regularly, with adverse events documented and reported according  
5 3 to Sponsor and HREC requirements. The decision to terminate the study lies with the principal  
6 4 investigators and will be based on the recruitment target and safety data. The PIs and trial coordinator  
7 5 are monitoring data integrity throughout the trial.  
8  
9 6

### 7 **Trial management structure**

8 This is a pilot study and does not require an intricate management structure. The advisory committee  
9 provide advice or complete discrete tasks (Table 2). The management of day-to-day trial activities is  
10 10 overseen by the principal investigators and the trial coordinator (IL, CH, & BY). This trial does not  
11 11 have an independent data safety monitoring committee because it is a single-site single-night small  
12 12 sample study with a medication that is thought to have a low side-effect profile in a group of patients  
13 13 that are known not to be at high risk of life-threatening events.[66]  
14 14

### 15 **Roles and responsibilities**

16

1 *Table 2. Investigator roles and responsibilities*

| Investigator                           | Role                                                                   |
|----------------------------------------|------------------------------------------------------------------------|
| Dr Camilla Hoyos                       | Principal Non-Medical Investigator                                     |
| Professor Brendon Yee                  | Principal Medical Investigator                                         |
| Professor Iain McGregor                | Advisory committee member (Pharmacologist and Cannabinoid Expert)      |
| Professor Ronald Grunstein             | Advisory committee member (Sleep Physician)                            |
| Professor Bandana Saini                | Advisory committee (Study Pharmacist)                                  |
| Associate Professor Nathaniel Marshall | Advisory committee (Study Statistician/Epidemiologist)                 |
| Associate Professor Christopher Gordon | Advisory committee member (Registered Nurse and Sleep Disorder Expert) |
| Dr Angela D'Rozario                    | Advisory committee member (Sleep Neurobiology Expert/Consultant)       |
| Dr Danielle McCartney                  | Driving Simulator and Cannabinoid Expert                               |
| Dr Chris Irwin                         | Advisory committee member (Driving Simulation Expert)                  |
| Dr Anastasia Suraev                    | Advisory committee member (Cannabinoid and Sleep Expert)               |
| Ms Isobel Lavender                     | Clinical Trial Coordinator/PhD student                                 |

2  
3 The study investigators have led the design and conduct of this trial, will conduct the analyses, and  
4 make all publication decisions.

### 5 **Statistical analyses**

6 Statistical analyses will be completed using a commercial statistical package (e.g., SPSS, SAS, etc).  
7 Descriptive statistics will be described using means and standard deviations or counts and percentages  
8 as appropriate. Adverse events and serious adverse events will be tabulated with the total number of  
9 incidents by each timepoint. No formal hypothesis testing will be conducted on adverse event and  
10 serious adverse event data. Due to insufficient statistical power the KSS will only be described using a  
11 median and interquartile range. Continuous outcome data will be analysed using Linear Mixed Models  
12 due to expected inter-participant variability with repeated measures and ability to handle missing data.  
13 Where variables are collected pre-drug administration (i.e., treatment session 'baseline') for the  
14 outcome being analysed, those scores will also be included in the model as a covariate (e.g.,  
15 posturography, WPT, FTT, DEQ, POMS). Participants will be random factors. Fixed factors will be  
16 treatment (placebo, 30 mg CBN, and 300 mg CBN) and the arm (first, second, and third) of the study.  
17 Analysis will be by intention to treat. Difference in least squared means inside the treatment main effect  
18 will only be investigated for the hypotheses that the two active treatments are superior to placebo. We  
19 will not present a p-value comparison for the two active doses. The critical p-values for each of these  
20 hypotheses is set at 0.05 (two-tailed). Effect sizes will be calculated as partial eta squared ( $\eta_p^2$ ), Cohen's  
21 d, and Hedges' g, where appropriate. A Statistical Analysis Plan will be finalised before last patient last  
22 visit and will be publicly available and/or upon request.[67] We are not undertaking any interim or  
23 stratified analyses.

### 24 **Ethics and dissemination**



1  
2  
3 1 Ethics and dissemination: Human Research Ethics Committee approval has been granted by Bellberry  
4 2 Limited (2021-08-907). Study findings will be disseminated via scientific peer-reviewed publications,  
5 3 conferences, and media, as applicable.  
6 4

#### 5 **Access to data**

6 Information will be provided such that participants cannot be identified. Non-identifiable Individual  
7 Participant Data (IPD) will become available one year after study completion and will be available upon  
8 reasonable request to the principal investigators.  
9

#### 10 **Author contributions**

11 IL, DM, NSM, AS, CI, AD, CG, RRG, BY, ISM, and CMH were involved in methodological design  
12 and creation of the study protocol. BY and CMH are the principal investigators (medical and non-  
13 medical, respectively) who have overall responsibility for the design, conduct, and decision to submit  
14 for publication. NSM is the study epidemiologist and statistician who will design and publish the  
15 analysis plan in collaboration with IL. IL is the trial coordinator responsible for collecting trial data. IL  
16 drafted the manuscript. Investigator roles and responsibilities are outlined in Table 1. All authors have  
17 read and approved the final manuscript.  
18

#### 19 **Funding**

20 The study is being funded by the Lambert Initiative for Cannabinoid Therapeutics, University of  
21 Sydney, a philanthropically funded centre for cannabinoid research. The investigational product was  
22 purchased from Medropharm (Zürich, Switzerland) through BOD Australia (Sydney, Australia); who  
23 was not involved in the conception, design, or conduct of the study. IL is supported by a Barry and Joy  
24 Lambert Postgraduate Research Scholarship. AS is supported by the Lambert Initiative for Cannabinoid  
25 Therapeutics, University of Sydney. CMH is funded by a National Heart Foundation Future Leader  
26 Fellowship. ALD (2008001) and RRG (1197439) are funded by National Health and Medical Research  
27 Council-Australian (NHMRC) Investigator Grants.  
28

#### 29 **Competing interest statement**

30 ISM is the Academic Director of the Lambert Initiative for Cannabinoid Therapeutics, Brain and Mind  
31 Centre, University of Sydney. ISM is a consultant for Kinaxis Therapeutics, Psylo Ltd, and Emyria and  
32 is an inventor on several patents relating to novel cannabinoid and non-cannabinoid therapeutics  
33 unrelated to insomnia. He has received consulting fees from the Medicinal Cannabis Industry Australia  
34 (MCIA) and acts as an expert witness in legal cases involving cannabis-related issues. AS has received  
35 consulting fees from the Medicinal Cannabis Industry Australia (MCIA) and Haleon Australia. RRG  
36 has received discounted investigational products for an unrelated clinical trial from Neurim  
37 Pharmaceuticals Inc and received investigational product and matched placebo from Teva  
38 Pharmaceutical in unrelated clinical trials. He has received funding for lectures for Pfizer, Teva, Jazz  
39 and Eisai in the past 3 years. The other authors have no competing interests to disclose. The Woolcock  
40 Institute Sleep and Chronobiology Research Group has received research support from Avadel,  
41 Nyxoah, Idorsa, ResMed, BOD Australia, and Philips.  
42

#### 43 **Patient consent for publication**

44 Not required.  
45  
46  
47  
48  
49  
50  
51  
52  
53  
54  
55  
56  
57  
58  
59  
60



## References

1. Medicine, A.A.o.S., *International Classification of Sleep Disorders*, ed. Darien. 2014, IL: American Academy of Sleep Medicine.
2. Appleton, S.L., et al., *Prevalence and comorbidity of sleep conditions in Australian adults: 2016 Sleep Health Foundation national survey*. *Sleep Health*, 2018. **4**(1): p. 13-19.
3. Morin, C.M., et al., *Incidence, Persistence, and Remission Rates of Insomnia Over 5 Years*. *JAMA Network Open*, 2020. **3**(11): p. e2018782-e2018782.
4. Riemann, D., et al., *Sleep, insomnia, and depression*. *Neuropsychopharmacology*, 2020. **45**(1): p. 74-89.
5. de Almondes, K.M., et al., *Insomnia and risk of dementia in older adults: Systematic review and meta-analysis*. *J Psychiatr Res*, 2016. **77**: p. 109-15.
6. Streatfeild, J., et al., *The social and economic cost of sleep disorders*. *Sleep*, 2021. **44**(11).
7. Grima, N.A., B. Bei, and D. Mansfield, *Insomnia management*. *Australian Journal for General Practitioners*, 2019. **48**(4): p. 198-202.
8. Koffel, E., A.D. Bramoweth, and C.S. Ulmer, *Increasing access to and utilization of cognitive behavioral therapy for insomnia (CBT-I): a narrative review*. *J Gen Intern Med*, 2018. **33**(6): p. 955-962.
9. Matthews, E.E., et al., *Adherence to cognitive behavioral therapy for insomnia: a systematic review*. *Sleep Med Rev*, 2013. **17**(6): p. 453-64.
10. Troxel, W.M., et al., *Predictors of treatment response to brief behavioral treatment of insomnia (BBTI) in older adults*. *J Clin Sleep Med*, 2013. **9**(12): p. 1281-9.
11. Crowe, S.F. and E.K. Stranks, *The Residual Medium and Long-term Cognitive Effects of Benzodiazepine Use: An Updated Meta-analysis*. *Arch Clin Neuropsychol*, 2018. **33**(7): p. 901-911.
12. Lu, H.C. and K. Mackie, *An Introduction to the Endogenous Cannabinoid System*. *Biol Psychiatry*, 2016. **79**(7): p. 516-25.
13. Lintzeris, N., et al., *Medical cannabis use in the Australian community following introduction of legal access: the 2018-2019 Online Cross-Sectional Cannabis as Medicine Survey (CAMS-18)*. *Harm Reduct J*, 2020. **17**(1): p. 37.
14. Corroon, J., *Cannabinol and Sleep: Separating Fact from Fiction*. *Cannabis Cannabinoid Res*, 2021. **6**(5): p. 366-371.
15. Hazekamp, A., et al., *Chemistry of Cannabis*, in *Comprehensive Natural Products II*. 2010, Science Direct: Leiden, The Netherlands. p. 1033-1084.
16. Hartley, M. *Leafly*. The 'sleepy' cannabinoid CBN might not actually be sedating 2019; Available from: <https://www.leafly.com/news/health/is-cbn-cannabinoid-sedating>.
17. *Full Spectrum CBN Oil (60mg/mL)*. 2022; Available from: <https://nuleafnaturals.com/product/full-spectrum-cbn-oil-60mg-ml/#:~:text=NuLeaf%20Naturals%20suggests%20a%20starting,Improved%20sleep%20and%20relaxation>.
18. Kesner, A.J. and D.M. Lovinger, *Cannabinoids, Endocannabinoids and Sleep*. *Front Mol Neurosci*, 2020. **13**: p. 125.
19. Murillo-Rodriguez, E., *The role of the CB1 receptor in the regulation of sleep*. *Prog Neuropsychopharmacol Biol Psychiatry*, 2008. **32**(6): p. 1420-7.
20. Sanford, A.E., E. Castillo, and R.L. Gannon, *Cannabinoids and hamster circadian activity rhythms*. *Brain Res*, 2008. **1222**: p. 141-8.

1  
2  
3  
4  
5  
6  
7  
8  
9  
10  
11  
12  
13  
14  
15  
16  
17  
18  
19  
20  
21  
22  
23  
24  
25  
26  
27  
28  
29  
30  
31  
32  
33  
34  
35  
36  
37  
38  
39  
40  
41  
42  
43  
44  
45  
46  
47  
48  
49  
50  
51  
52  
53  
54  
55  
56  
57  
58  
59  
60

- 1 21. Murillo-Rodriguez, E., et al., *Anandamide-induced sleep is blocked by SR141716A, a CBI receptor antagonist and by U73122, a phospholipase C inhibitor*. Neuroreport, 2001. **12**(10): p. 2131-2136.
- 2 22. Murillo-Rodriguez, E., et al., *Anandamide modulates sleep and memory in rats*. Brain Res, 1998. **812**(1-2): p. 270-4.
- 3 23. Steinberg, B.A. and C.P. Cannon, *Cannabinoid-1 receptor blockade in cardiometabolic risk reduction: safety, tolerability, and therapeutic potential*. Am J Cardiol, 2007. **100**(12A): p. 27P-32P.
- 4 24. Zou, S. and U. Kumar, *Cannabinoid Receptors and the Endocannabinoid System: Signaling and Function in the Central Nervous System*. Int J Mol Sci, 2018. **19**(3).
- 5 25. Wallach, J., *Medicinal Cannabis: an overview for health-care providers*, in Remington. 2021. p. 75-101.
- 6 26. Bird, K.D., et al., *Intercannabinoid and Cannabinoid-Ethanol Interactions and Their Effects on Human-Performance*. Psychopharmacology, 1980. **71**(2): p. 181-188.
- 7 27. Perez-Reyes, M., et al., *A comparison of the pharmacological activity in man of intravenously administered delta9-tetrahydrocannabinol, cannabiniol, and cannabidiol*. Experientia, 1973. **29**(11): p. 1368-9.
- 8 28. Walsh, J.H., et al., *Treating insomnia symptoms with medicinal cannabis: a randomized, crossover trial of the efficacy of a cannabinoid medicine compared with placebo*. Sleep, 2021. **44**(11).
- 9 29. Gannon, W., et al., *Novel Formulation of THC and CBN in a Repeat-Action Tablet Improves Objective and Subjective Measurements of Sleep* American Journal of Endocannabinoid Medicine, 2021. **3**(1): p. 12-18.
- 10 30. Ocelli Hanbury Brown, C., et al., *THE PHYTOCANNABINOID CANNABINOL (CBN) ENHANCES SLEEP AND ALTERS SLEEP ARCHITECTURE IN RATS*, in *32nd Annual Symposium on the Cannabinoids, International Cannabinoid Research Society, Galway, Ireland*. 2022: Research Triangle Park, NC, USA. p. P2-1.
- 11 31. Berry, R.B., R. Brooks, and C.E. Gamaldo, *The AASM manual for the scoring of sleep and associated events: rules, terminology and technical specifications, version 2.6. 0*. American Academy of Sleep Medicine, Darien, Illinois; 2020. Most recent scoring manual from the American Academy of Sleep Medicine (AASM), 2020.
- 12 32. *Standard for the Uniform Scheduling of Medicines and Poisons*. 2022, Therapeutic Goods Administration: Woden, Australia.
- 13 33. Gong, H., Jr., et al., *Acute and subacute bronchial effects of oral cannabinoids*. Clin Pharmacol Ther, 1984. **35**(1): p. 26-32.
- 14 34. Karniol, I.G., et al., *Effects of delta9-tetrahydrocannabinol and cannabiniol in man*. Pharmacology, 1975. **13**(6): p. 502-12.
- 15 35. Hollister, L., *Cannabidiol and Cannabiniol in Man*, Specialia, Editor. 1973, Experientia.
- 16 36. Chan, A.W., et al., *SPIRIT 2013 statement: defining standard protocol items for clinical trials*. Ann Intern Med, 2013. **158**(3): p. 200-7.
- 17 37. *International Classification of Sleep Disorders*. 3 ed, ed. A.A.o.S. Medicine. 2014, Darien, IL: American Academy of Sleep Medicine.
- 18 38. *Diagnostic and statistical manual of mental disorders : DSM-5*, in *American Psychiatric Association. Diagnostic and statistical manual of mental disorders, Fifth edition*. 2013, American Psychiatric Publishing: Arlington, VA.
- 19 39. Edwards, B.A., et al., *Aging and sleep: physiology and pathophysiology*. Semin Respir Crit Care Med, 2010. **31**(5): p. 618-33.
- 20 40. Whiting, P.F., et al., *Cannabinoids for Medical Use: A Systematic Review and Meta-analysis*. JAMA, 2015. **313**(24): p. 2456-73.

- 1 41. Spitzer, R.L., K. Kroenke, and J.B. Williams, *Validation and utility of a self-report*  
2 *version of PRIME-MD: the PHQ primary care study. Primary Care Evaluation of*  
3 *Mental Disorders. Patient Health Questionnaire.* Jama, 1999. **282**(18): p. 1737-44.
- 4 42. Suraev, A., et al., *Cannabidiol (CBD) and Delta(9)-tetrahydrocannabinol (THC) for*  
5 *chronic insomnia disorder ('CANSLEEP' trial): protocol for a randomised, placebo-*  
6 *controlled, double-blinded, proof-of-concept trial.* BMJ Open, 2020. **10**(5): p.  
7 e034421.
- 8 43. Bastien, C.H., A. Vallières, and C.M. Morin, *Validation of the Insomnia Severity*  
9 *Index as an outcome measure for insomnia research.* Sleep Med, 2001. **2**(4): p. 297-  
10 307.
- 11 44. Johns, M.W., *A new method for measuring daytime sleepiness: the Epworth*  
12 *sleepiness scale.* Sleep, 1991. **14**(6): p. 540-5.
- 13 45. Zigmond, A.S. and R.P. Snaith, *The hospital anxiety and depression scale.* Acta  
14 Psychiatr Scand, 1983. **67**(6): p. 361-70.
- 15 46. Berry, R.B., et al., *AASM Scoring Manual Version 2.2 Updates: New Chapters for*  
16 *Scoring Infant Sleep Staging and Home Sleep Apnea Testing.* J Clin Sleep Med, 2015.  
17 **11**(11): p. 1253-4.
- 18 47. Akerstedt, T., et al., *The subjective meaning of good sleep, an intraindividual*  
19 *approach using the Karolinska Sleep Diary.* Percept Mot Skills, 1994. **79**(1 Pt 1): p.  
20 287-96.
- 21 48. McCartney, D., et al., *Effects of cannabidiol on simulated driving and cognitive*  
22 *performance: A dose-ranging randomised controlled trial.* Journal of  
23 Psychopharmacology, 2022: p. 02698811221095356.
- 24 49. Huestis, M.A., *Human cannabinoid pharmacokinetics.* Chem Biodivers, 2007. **4**(8):  
25 p. 1770-804.
- 26 50. Kevin, R.C., et al., *Urinary cannabinoid levels during nabiximols (Sativex®)-*  
27 *medicated inpatient cannabis withdrawal.* Forensic Toxicology, 2017. **35**(1): p. 33-  
28 44.
- 29 51. Sahinovic, A., et al., *Effects of Cannabidiol on Exercise Physiology and*  
30 *Bioenergetics: A Randomised Controlled Pilot Trial.* Sports Med Open, 2022. **8**(1): p.  
31 27.
- 32 52. Kevin, R.C., et al., *A validated method for the simultaneous quantification of*  
33 *cannabidiol,  $\Delta$ (9)-tetrahydrocannabinol, and their metabolites in human plasma and*  
34 *application to plasma samples from an oral cannabidiol open-label trial.* Drug Test  
35 Anal, 2021. **13**(3): p. 614-627.
- 36 53. McCartney, D., et al., *Orally administered cannabidiol does not produce false-*  
37 *positive tests for  $\Delta$ 9-tetrahydrocannabinol on the Securetec DrugWipe® 5S or Dräger*  
38 *DrugTest® 5000.* Drug Testing and Analysis, 2022. **14**(1): p. 137-143.
- 39 54. McCartney, D., et al., *Orally administered cannabidiol does not produce false-*  
40 *positive tests for  $\Delta$ (9)-tetrahydrocannabinol on the Securetec DrugWipe® 5S or*  
41 *Dräger DrugTest® 5000.* Drug Test Anal, 2022. **14**(1): p. 137-143.
- 42 55. Basner, M., D. Mollicone, and D.F. Dinges, *Validity and Sensitivity of a Brief*  
43 *Psychomotor Vigilance Test (PVT-B) to Total and Partial Sleep Deprivation.* Acta  
44 Astronaut, 2011. **69**(11-12): p. 949-959.
- 45 56. Gibson, S.J., *The measurement of mood states in older adults.* J Gerontol B Psychol  
46 Sci Soc Sci, 1997. **52**(4): p. P167-74.
- 47 57. Morean, M.E., et al., *The drug effects questionnaire: psychometric support across*  
48 *three drug types.* Psychopharmacology (Berl), 2013. **227**(1): p. 177-92.
- 49 58. Shahid, A., et al., *Leeds Sleep Evaluation Questionnaire (LSEQ).* 2011, Springer New  
50 York: New York, NY. p. 211-213.

- 1  
2  
3 1 59. Turci, A.M., et al., *The Brazilian Portuguese version of the revised Maastricht Upper*  
4 2 *Extremity Questionnaire (MUEQ-Br revised): translation, cross-cultural adaptation,*  
5 3 *reliability, and structural validation.* BMC Musculoskelet Disord, 2015. **16**: p. 41.  
6 4 60. Putilov, A.A. and O.G. Donskaya, *Construction and validation of the EEG analogues*  
7 5 *of the Karolinska sleepiness scale based on the Karolinska drowsiness test.* Clinical  
8 6 neurophysiology, 2013. **124**(7): p. 1346-1352.  
9 7 61. D'Rozario, A.L., et al., *An automated algorithm to identify and reject artefacts for*  
10 8 *quantitative EEG analysis during sleep in patients with sleep-disordered breathing.*  
11 9 Sleep Breath, 2015. **19**(2): p. 607-15.  
12 10 62. D'Rozario, A.L., et al., *Improvements in cognitive function and quantitative sleep*  
13 11 *electroencephalogram in obstructive sleep apnea after six months of continuous*  
14 12 *positive airway pressure treatment.* Sleep, 2022. **45**(6).  
15 13 63. Arkell, T.R., et al., *Cannabidiol (CBD) content in vaporized cannabis does not*  
16 14 *prevent tetrahydrocannabinol (THC)-induced impairment of driving and cognition.*  
17 15 Psychopharmacology (Berl), 2019. **236**(9): p. 2713-2724.  
18 16 64. Ogata, N.G., et al., *Mobile Telephone Use and Reaction Time in Drivers With*  
19 17 *Glaucoma.* JAMA Netw Open, 2019. **2**(4): p. e192169.  
20 18 65. McCartney, D., et al., *Determining the magnitude and duration of acute Delta(9)-*  
21 19 *tetrahydrocannabinol (Delta(9)-THC)-induced driving and cognitive impairment: A*  
22 20 *systematic and meta-analytic review.* Neurosci Biobehav Rev, 2021. **126**: p. 175-193.  
23 21 66. Ellenberg, S.S., T.R. Fleming, and D.L. DeMets, *Data monitoring in clinical trials : a*  
24 22 *practical perspective.* Second edition. ed. Statistics in practice. 2019, Hoboken, NJ:  
25 23 Wiley.  
26 24 67. Gamble, C., et al., *Guidelines for the Content of Statistical Analysis Plans in Clinical*  
27 25 *Trials.* JAMA, 2017. **318**(23): p. 2337-2343.  
28  
29  
30  
31  
32  
33  
34  
35  
36  
37  
38  
39  
40  
41  
42  
43  
44  
45  
46  
47  
48  
49  
50  
51  
52  
53  
54  
55  
56  
57  
58  
59  
60

1  
2  
3  
4  
5  
6  
7  
8  
9  
10  
11  
12  
13  
14  
15  
16  
17  
18  
19  
20  
21  
22  
23  
24  
25  
26  
27  
28  
29  
30  
31  
32  
33  
34  
35  
36  
37  
38  
39  
40  
41  
42  
43  
44  
45  
46  
47  
48  
49  
50  
51  
52  
53  
54  
55  
56  
57  
58  
59  
60





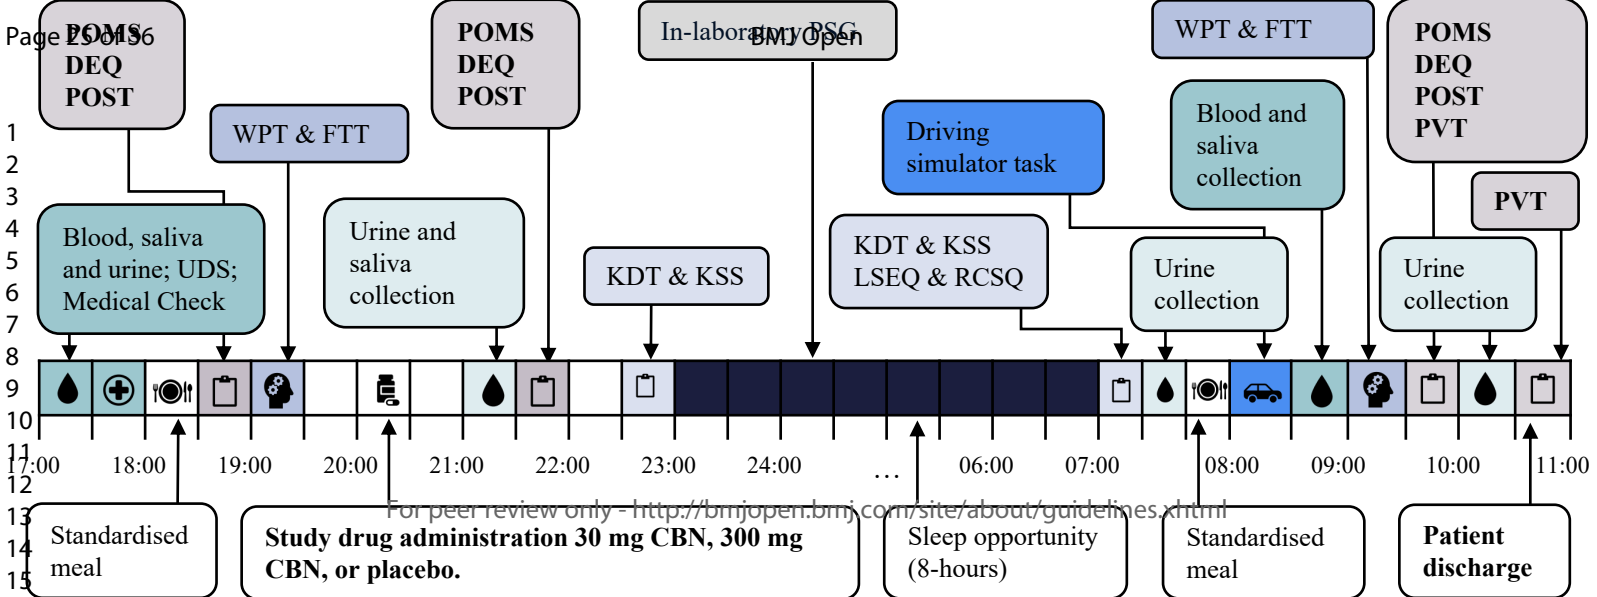



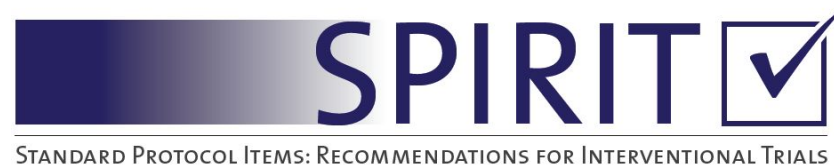

SPIRIT 2013 Checklist: Recommended items to address in a clinical trial protocol and related documents\*

| Section/item                      | Item No | Description                                                                                                                                                                                                                                                                              | Addressed on page number     |
|-----------------------------------|---------|------------------------------------------------------------------------------------------------------------------------------------------------------------------------------------------------------------------------------------------------------------------------------------------|------------------------------|
| <b>Administrative information</b> |         |                                                                                                                                                                                                                                                                                          |                              |
| Title                             | 1       | Descriptive title identifying the study design, population, interventions, and, if applicable, trial acronym                                                                                                                                                                             | 1 _____                      |
| Trial registration                | 2a      | Trial identifier and registry name. If not yet registered, name of intended registry                                                                                                                                                                                                     | 1,2,5,7                      |
|                                   | 2b      | All items from the World Health Organization Trial Registration Data Set                                                                                                                                                                                                                 | In trial registration        |
| Protocol version                  | 3       | Date and version identifier                                                                                                                                                                                                                                                              | 7                            |
| Funding                           | 4       | Sources and types of financial, material, and other support                                                                                                                                                                                                                              | 1,2,6,18                     |
| Roles and responsibilities        | 5a      | Names, affiliations, and roles of protocol contributors                                                                                                                                                                                                                                  | 1,6,16-18                    |
|                                   | 5b      | Name and contact information for the trial sponsor                                                                                                                                                                                                                                       | 1, 6, and trial registration |
|                                   | 5c      | Role of study sponsor and funders, if any, in study design; collection, management, analysis, and interpretation of data; writing of the report; and the decision to submit the report for publication, including whether they will have ultimate authority over any of these activities | 6-7,18                       |

|    |                                                           |     |                                                                                                                                                                                                                                                                  |             |
|----|-----------------------------------------------------------|-----|------------------------------------------------------------------------------------------------------------------------------------------------------------------------------------------------------------------------------------------------------------------|-------------|
| 1  |                                                           | 5d  | Composition, roles, and responsibilities of the coordinating centre, steering committee, endpoint adjudication committee, data management team, and other individuals or groups overseeing the trial, if applicable (see Item 21a for data monitoring committee) | 16-18       |
| 2  |                                                           |     |                                                                                                                                                                                                                                                                  |             |
| 3  |                                                           |     |                                                                                                                                                                                                                                                                  |             |
| 4  |                                                           |     |                                                                                                                                                                                                                                                                  |             |
| 5  |                                                           |     |                                                                                                                                                                                                                                                                  |             |
| 6  |                                                           |     |                                                                                                                                                                                                                                                                  |             |
| 7  |                                                           |     |                                                                                                                                                                                                                                                                  |             |
| 8  |                                                           |     |                                                                                                                                                                                                                                                                  |             |
| 9  |                                                           |     |                                                                                                                                                                                                                                                                  |             |
| 10 | <b>Introduction</b>                                       |     |                                                                                                                                                                                                                                                                  |             |
| 11 |                                                           |     |                                                                                                                                                                                                                                                                  |             |
| 12 | Background and rationale                                  | 6a  | Description of research question and justification for undertaking the trial, including summary of relevant studies (published and unpublished) examining benefits and harms for each intervention                                                               | 3-4         |
| 13 |                                                           |     |                                                                                                                                                                                                                                                                  |             |
| 14 |                                                           |     |                                                                                                                                                                                                                                                                  |             |
| 15 |                                                           | 6b  | Explanation for choice of comparators                                                                                                                                                                                                                            | 4           |
| 16 |                                                           |     |                                                                                                                                                                                                                                                                  |             |
| 17 | Objectives                                                | 7   | Specific objectives or hypotheses                                                                                                                                                                                                                                | 4           |
| 18 |                                                           |     |                                                                                                                                                                                                                                                                  |             |
| 19 | Trial design                                              | 8   | Description of trial design including type of trial (eg, parallel group, crossover, factorial, single group), allocation ratio, and framework (eg, superiority, equivalence, noninferiority, exploratory)                                                        | 4           |
| 20 |                                                           |     |                                                                                                                                                                                                                                                                  |             |
| 21 |                                                           |     |                                                                                                                                                                                                                                                                  |             |
| 22 |                                                           |     |                                                                                                                                                                                                                                                                  |             |
| 23 | <b>Methods: Participants, interventions, and outcomes</b> |     |                                                                                                                                                                                                                                                                  |             |
| 24 |                                                           |     |                                                                                                                                                                                                                                                                  |             |
| 25 | Study setting                                             | 9   | Description of study settings (eg, community clinic, academic hospital) and list of countries where data will be collected. Reference to where list of study sites can be obtained                                                                               | 6-7         |
| 26 |                                                           |     |                                                                                                                                                                                                                                                                  |             |
| 27 |                                                           |     |                                                                                                                                                                                                                                                                  |             |
| 28 | Eligibility criteria                                      | 10  | Inclusion and exclusion criteria for participants. If applicable, eligibility criteria for study centres and individuals who will perform the interventions (eg, surgeons, psychotherapists)                                                                     | 7-9 (Box 2) |
| 29 |                                                           |     |                                                                                                                                                                                                                                                                  |             |
| 30 |                                                           |     |                                                                                                                                                                                                                                                                  |             |
| 31 | Interventions                                             | 11a | Interventions for each group with sufficient detail to allow replication, including how and when they will be administered                                                                                                                                       | 9           |
| 32 |                                                           |     |                                                                                                                                                                                                                                                                  |             |
| 33 |                                                           |     |                                                                                                                                                                                                                                                                  |             |
| 34 |                                                           | 11b | Criteria for discontinuing or modifying allocated interventions for a given trial participant (eg, drug dose change in response to harms, participant request, or improving/worsening disease)                                                                   | 7-9 (Box 2) |
| 35 |                                                           |     |                                                                                                                                                                                                                                                                  |             |
| 36 |                                                           |     |                                                                                                                                                                                                                                                                  |             |
| 37 |                                                           | 11c | Strategies to improve adherence to intervention protocols, and any procedures for monitoring adherence (eg, drug tablet return, laboratory tests)                                                                                                                | 9, 14       |
| 38 |                                                           |     |                                                                                                                                                                                                                                                                  |             |
| 39 |                                                           |     |                                                                                                                                                                                                                                                                  |             |
| 40 |                                                           |     |                                                                                                                                                                                                                                                                  |             |
| 41 |                                                           | 11d | Relevant concomitant care and interventions that are permitted or prohibited during the trial                                                                                                                                                                    | 7-9 (Box 2) |
| 42 |                                                           |     |                                                                                                                                                                                                                                                                  |             |

|    |                      |    |                                                                                                                                                                                                                                                                                                                                                                                |                             |
|----|----------------------|----|--------------------------------------------------------------------------------------------------------------------------------------------------------------------------------------------------------------------------------------------------------------------------------------------------------------------------------------------------------------------------------|-----------------------------|
| 1  | Outcomes             | 12 | Primary, secondary, and other outcomes, including the specific measurement variable (eg, systolic blood pressure), analysis metric (eg, change from baseline, final value, time to event), method of aggregation (eg, median, proportion), and time point for each outcome. Explanation of the clinical relevance of chosen efficacy and harm outcomes is strongly recommended | 4-6 (Box 1), trial registry |
| 2  |                      |    |                                                                                                                                                                                                                                                                                                                                                                                |                             |
| 3  |                      |    |                                                                                                                                                                                                                                                                                                                                                                                |                             |
| 4  |                      |    |                                                                                                                                                                                                                                                                                                                                                                                |                             |
| 5  |                      |    |                                                                                                                                                                                                                                                                                                                                                                                |                             |
| 6  | Participant timeline | 13 | Time schedule of enrolment, interventions (including any run-ins and washouts), assessments, and visits for participants. A schematic diagram is highly recommended (see Figure)                                                                                                                                                                                               | Table 1; Figures 1-2        |
| 7  |                      |    |                                                                                                                                                                                                                                                                                                                                                                                |                             |
| 8  |                      |    |                                                                                                                                                                                                                                                                                                                                                                                |                             |
| 9  | Sample size          | 14 | Estimated number of participants needed to achieve study objectives and how it was determined, including clinical and statistical assumptions supporting any sample size calculations                                                                                                                                                                                          | 9                           |
| 10 |                      |    |                                                                                                                                                                                                                                                                                                                                                                                |                             |
| 11 |                      |    |                                                                                                                                                                                                                                                                                                                                                                                |                             |
| 12 |                      |    |                                                                                                                                                                                                                                                                                                                                                                                |                             |
| 13 | Recruitment          | 15 | Strategies for achieving adequate participant enrolment to reach target sample size                                                                                                                                                                                                                                                                                            | 9                           |
| 14 |                      |    |                                                                                                                                                                                                                                                                                                                                                                                |                             |
| 15 |                      |    |                                                                                                                                                                                                                                                                                                                                                                                |                             |

### Methods: Assignment of interventions (for controlled trials)

#### Allocation:

|    |                                  |     |                                                                                                                                                                                                                                                                                                                                                          |              |
|----|----------------------------------|-----|----------------------------------------------------------------------------------------------------------------------------------------------------------------------------------------------------------------------------------------------------------------------------------------------------------------------------------------------------------|--------------|
| 19 | Sequence generation              | 16a | Method of generating the allocation sequence (eg, computer-generated random numbers), and list of any factors for stratification. To reduce predictability of a random sequence, details of any planned restriction (eg, blocking) should be provided in a separate document that is unavailable to those who enrol participants or assign interventions | 10-11        |
| 20 |                                  |     |                                                                                                                                                                                                                                                                                                                                                          |              |
| 21 |                                  |     |                                                                                                                                                                                                                                                                                                                                                          |              |
| 22 |                                  |     |                                                                                                                                                                                                                                                                                                                                                          |              |
| 23 |                                  |     |                                                                                                                                                                                                                                                                                                                                                          |              |
| 24 |                                  |     |                                                                                                                                                                                                                                                                                                                                                          |              |
| 25 | Allocation concealment mechanism | 16b | Mechanism of implementing the allocation sequence (eg, central telephone; sequentially numbered, opaque, sealed envelopes), describing any steps to conceal the sequence until interventions are assigned                                                                                                                                                | 10-11        |
| 26 |                                  |     |                                                                                                                                                                                                                                                                                                                                                          |              |
| 27 |                                  |     |                                                                                                                                                                                                                                                                                                                                                          |              |
| 28 |                                  |     |                                                                                                                                                                                                                                                                                                                                                          |              |
| 29 | Implementation                   | 16c | Who will generate the allocation sequence, who will enrol participants, and who will assign participants to interventions                                                                                                                                                                                                                                | 10-11        |
| 30 |                                  |     |                                                                                                                                                                                                                                                                                                                                                          |              |
| 31 |                                  |     |                                                                                                                                                                                                                                                                                                                                                          |              |
| 32 |                                  |     |                                                                                                                                                                                                                                                                                                                                                          |              |
| 33 | Blinding (masking)               | 17a | Who will be blinded after assignment to interventions (eg, trial participants, care providers, outcome assessors, data analysts), and how                                                                                                                                                                                                                | 10-11, 17-18 |
| 34 |                                  |     |                                                                                                                                                                                                                                                                                                                                                          |              |
| 35 |                                  |     |                                                                                                                                                                                                                                                                                                                                                          |              |
| 36 |                                  | 17b | If blinded, circumstances under which unblinding is permissible, and procedure for revealing a participant's allocated intervention during the trial                                                                                                                                                                                                     | 10           |
| 37 |                                  |     |                                                                                                                                                                                                                                                                                                                                                          |              |
| 38 |                                  |     |                                                                                                                                                                                                                                                                                                                                                          |              |
| 39 |                                  |     |                                                                                                                                                                                                                                                                                                                                                          |              |

### Methods: Data collection, management, and analysis

|    |                            |     |                                                                                                               |        |
|----|----------------------------|-----|---------------------------------------------------------------------------------------------------------------|--------|
| 1  | Data collection            | 18a | Plans for assessment and collection of outcome, baseline, and other trial data, including any related         | 10-16  |
| 2  | methods                    |     | processes to promote data quality (eg, duplicate measurements, training of assessors) and a description of    |        |
| 3  |                            |     | study instruments (eg, questionnaires, laboratory tests) along with their reliability and validity, if known. |        |
| 4  |                            |     | Reference to where data collection forms can be found, if not in the protocol                                 |        |
| 5  |                            |     |                                                                                                               |        |
| 6  |                            | 18b | Plans to promote participant retention and complete follow-up, including list of any outcome data to be       | 10, 15 |
| 7  |                            |     | collected for participants who discontinue or deviate from intervention protocols                             |        |
| 8  |                            |     |                                                                                                               |        |
| 9  | Data management            | 19  | Plans for data entry, coding, security, and storage, including any related processes to promote data quality  | 16-17  |
| 10 |                            |     | (eg, double data entry; range checks for data values). Reference to where details of data management          |        |
| 11 |                            |     | procedures can be found, if not in the protocol                                                               |        |
| 12 |                            |     |                                                                                                               |        |
| 13 |                            |     |                                                                                                               |        |
| 14 | Statistical methods        | 20a | Statistical methods for analysing primary and secondary outcomes. Reference to where other details of the     | 18     |
| 15 |                            |     | statistical analysis plan can be found, if not in the protocol                                                |        |
| 16 |                            |     |                                                                                                               |        |
| 17 |                            | 20b | Methods for any additional analyses (eg, subgroup and adjusted analyses)                                      | 18     |
| 18 |                            |     |                                                                                                               |        |
| 19 |                            | 20c | Definition of analysis population relating to protocol non-adherence (eg, as randomised analysis), and any    | 18     |
| 20 |                            |     | statistical methods to handle missing data (eg, multiple imputation)                                          |        |
| 21 |                            |     |                                                                                                               |        |
| 22 |                            |     |                                                                                                               |        |
| 23 | <b>Methods: Monitoring</b> |     |                                                                                                               |        |
| 24 |                            |     |                                                                                                               |        |
| 25 | Data monitoring            | 21a | Composition of data monitoring committee (DMC); summary of its role and reporting structure; statement of     | 15-18  |
| 26 |                            |     | whether it is independent from the sponsor and competing interests; and reference to where further details    |        |
| 27 |                            |     | about its charter can be found, if not in the protocol. Alternatively, an explanation of why a DMC is not     |        |
| 28 |                            |     | needed                                                                                                        |        |
| 29 |                            |     |                                                                                                               |        |
| 30 |                            | 21b | Description of any interim analyses and stopping guidelines, including who will have access to these          | 17     |
| 31 |                            |     | interim results and make the final decision to terminate the trial                                            |        |
| 32 |                            |     |                                                                                                               |        |
| 33 |                            |     |                                                                                                               |        |
| 34 | Harms                      | 22  | Plans for collecting, assessing, reporting, and managing solicited and spontaneously reported adverse         | 15     |
| 35 |                            |     | events and other unintended effects of trial interventions or trial conduct                                   |        |
| 36 |                            |     |                                                                                                               |        |
| 37 | Auditing                   | 23  | Frequency and procedures for auditing trial conduct, if any, and whether the process will be independent      | 16     |
| 38 |                            |     | from investigators and the sponsor                                                                            |        |
| 39 |                            |     |                                                                                                               |        |
| 40 |                            |     |                                                                                                               |        |

41 **Ethics and dissemination**

|    |                               |     |                                                                                                                                                                                                                                                                                     |                        |
|----|-------------------------------|-----|-------------------------------------------------------------------------------------------------------------------------------------------------------------------------------------------------------------------------------------------------------------------------------------|------------------------|
| 1  | Research ethics approval      | 24  | Plans for seeking research ethics committee/institutional review board (REC/IRB) approval                                                                                                                                                                                           | 1, 2, 7, 17            |
| 2  |                               |     |                                                                                                                                                                                                                                                                                     |                        |
| 3  |                               |     |                                                                                                                                                                                                                                                                                     |                        |
| 4  | Protocol amendments           | 25  | Plans for communicating important protocol modifications (eg, changes to eligibility criteria, outcomes, analyses) to relevant parties (eg, investigators, REC/IRBs, trial participants, trial registries, journals, regulators)                                                    | 7                      |
| 5  |                               |     |                                                                                                                                                                                                                                                                                     |                        |
| 6  |                               |     |                                                                                                                                                                                                                                                                                     |                        |
| 7  |                               |     |                                                                                                                                                                                                                                                                                     |                        |
| 8  | Consent or assent             | 26a | Who will obtain informed consent or assent from potential trial participants or authorised surrogates, and how (see Item 32)                                                                                                                                                        | 9-10                   |
| 9  |                               |     |                                                                                                                                                                                                                                                                                     |                        |
| 10 |                               |     |                                                                                                                                                                                                                                                                                     |                        |
| 11 |                               |     |                                                                                                                                                                                                                                                                                     |                        |
| 12 |                               | 26b | Additional consent provisions for collection and use of participant data and biological specimens in ancillary studies, if applicable                                                                                                                                               | N/A                    |
| 13 |                               |     |                                                                                                                                                                                                                                                                                     |                        |
| 14 |                               |     |                                                                                                                                                                                                                                                                                     |                        |
| 15 | Confidentiality               | 27  | How personal information about potential and enrolled participants will be collected, shared, and maintained in order to protect confidentiality before, during, and after the trial                                                                                                | 15-16                  |
| 16 |                               |     |                                                                                                                                                                                                                                                                                     |                        |
| 17 |                               |     |                                                                                                                                                                                                                                                                                     |                        |
| 18 | Declaration of interests      | 28  | Financial and other competing interests for principal investigators for the overall trial and each study site                                                                                                                                                                       | 18                     |
| 19 |                               |     |                                                                                                                                                                                                                                                                                     |                        |
| 20 |                               |     |                                                                                                                                                                                                                                                                                     |                        |
| 21 | Access to data                | 29  | Statement of who will have access to the final trial dataset, and disclosure of contractual agreements that limit such access for investigators                                                                                                                                     | 1, 10, 16-18           |
| 22 |                               |     |                                                                                                                                                                                                                                                                                     |                        |
| 23 |                               |     |                                                                                                                                                                                                                                                                                     |                        |
| 24 | Ancillary and post-trial care | 30  | Provisions, if any, for ancillary and post-trial care, and for compensation to those who suffer harm from trial participation                                                                                                                                                       | 13                     |
| 25 |                               |     |                                                                                                                                                                                                                                                                                     |                        |
| 26 |                               |     |                                                                                                                                                                                                                                                                                     |                        |
| 27 |                               |     |                                                                                                                                                                                                                                                                                     |                        |
| 28 | Dissemination policy          | 31a | Plans for investigators and sponsor to communicate trial results to participants, healthcare professionals, the public, and other relevant groups (eg, via publication, reporting in results databases, or other data sharing arrangements), including any publication restrictions | 1, 2, 17               |
| 29 |                               |     |                                                                                                                                                                                                                                                                                     |                        |
| 30 |                               |     |                                                                                                                                                                                                                                                                                     |                        |
| 31 |                               |     |                                                                                                                                                                                                                                                                                     |                        |
| 32 |                               | 31b | Authorship eligibility guidelines and any intended use of professional writers                                                                                                                                                                                                      | 17                     |
| 33 |                               |     |                                                                                                                                                                                                                                                                                     |                        |
| 34 |                               | 31c | Plans, if any, for granting public access to the full protocol, participant-level dataset, and statistical code                                                                                                                                                                     | 18; trial registry     |
| 35 |                               |     |                                                                                                                                                                                                                                                                                     |                        |
| 36 |                               |     |                                                                                                                                                                                                                                                                                     |                        |
| 37 | <b>Appendices</b>             |     |                                                                                                                                                                                                                                                                                     |                        |
| 38 |                               |     |                                                                                                                                                                                                                                                                                     |                        |
| 39 | Informed consent materials    | 32  | Model consent form and other related documentation given to participants and authorised surrogates                                                                                                                                                                                  | Supplementary material |
| 40 |                               |     |                                                                                                                                                                                                                                                                                     |                        |
| 41 |                               |     |                                                                                                                                                                                                                                                                                     |                        |
| 42 |                               |     |                                                                                                                                                                                                                                                                                     |                        |
| 43 |                               |     |                                                                                                                                                                                                                                                                                     |                        |
| 44 |                               |     |                                                                                                                                                                                                                                                                                     |                        |
| 45 |                               |     |                                                                                                                                                                                                                                                                                     |                        |
| 46 |                               |     |                                                                                                                                                                                                                                                                                     |                        |

|   |            |    |                                                                                                           |    |
|---|------------|----|-----------------------------------------------------------------------------------------------------------|----|
| 1 | Biological | 33 | Plans for collection, laboratory evaluation, and storage of biological specimens for genetic or molecular | 13 |
| 2 | specimens  |    | analysis in the current trial and for future use in ancillary studies, if applicable                      |    |

---

4 \*It is strongly recommended that this checklist be read in conjunction with the SPIRIT 2013 Explanation & Elaboration for important clarification on the items.  
5 Amendments to the protocol should be tracked and dated. The SPIRIT checklist is copyrighted by the SPIRIT Group under the Creative Commons  
6 [“Attribution-NonCommercial-NoDerivs 3.0 Unported”](#) license.  
7

For peer review only

8  
9  
10  
11  
12  
13  
14  
15  
16  
17  
18  
19  
20  
21  
22  
23  
24  
25  
26  
27  
28  
29  
30  
31  
32  
33  
34  
35  
36  
37  
38  
39  
40  
41  
42  
43  
44  
45  
46



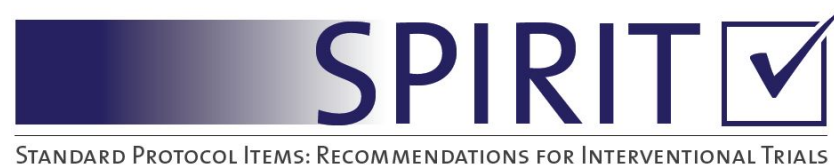

SPIRIT 2013 Checklist: Recommended items to address in a clinical trial protocol and related documents\*

| Section/item                      | Item No | Description                                                                                                                                                                                                                                                                              | Addressed on page number    |
|-----------------------------------|---------|------------------------------------------------------------------------------------------------------------------------------------------------------------------------------------------------------------------------------------------------------------------------------------------|-----------------------------|
| <b>Administrative information</b> |         |                                                                                                                                                                                                                                                                                          |                             |
| Title                             | 1       | Descriptive title identifying the study design, population, interventions, and, if applicable, trial acronym                                                                                                                                                                             | 1 _____                     |
| Trial registration                | 2a      | Trial identifier and registry name. If not yet registered, name of intended registry                                                                                                                                                                                                     | 1,2,5,7                     |
|                                   | 2b      | All items from the World Health Organization Trial Registration Data Set                                                                                                                                                                                                                 | In trial registration       |
| Protocol version                  | 3       | Date and version identifier                                                                                                                                                                                                                                                              | 75                          |
| Funding                           | 4       | Sources and types of financial, material, and other support                                                                                                                                                                                                                              | 1,2,6,185,16                |
| Roles and responsibilities        | 5a      | Names, affiliations, and roles of protocol contributors                                                                                                                                                                                                                                  | 1,6,5,14-16-18              |
|                                   | 5b      | Name and contact information for the trial sponsor                                                                                                                                                                                                                                       | 1,6, and trial registration |
|                                   | 5c      | Role of study sponsor and funders, if any, in study design; collection, management, analysis, and interpretation of data; writing of the report; and the decision to submit the report for publication, including whether they will have ultimate authority over any of these activities | 6-7,185,16                  |

1  
2  
3  
4  
5  
6  
7  
8  
9  
10  
11  
12  
13  
14  
15  
16  
17  
18  
19  
20  
21  
22  
23  
24  
25  
26  
27  
28  
29  
30  
31  
32  
33  
34  
35  
36  
37  
38  
39  
40  
41  
42  
43  
44  
45  
46

|                                                           |     |                                                                                                                                                                                                                                                                  |                                                 |
|-----------------------------------------------------------|-----|------------------------------------------------------------------------------------------------------------------------------------------------------------------------------------------------------------------------------------------------------------------|-------------------------------------------------|
|                                                           | 5d  | Composition, roles, and responsibilities of the coordinating centre, steering committee, endpoint adjudication committee, data management team, and other individuals or groups overseeing the trial, if applicable (see Item 21a for data monitoring committee) | <a href="#">14-16-18</a>                        |
| <b>Introduction</b>                                       |     |                                                                                                                                                                                                                                                                  |                                                 |
| Background and rationale                                  | 6a  | Description of research question and justification for undertaking the trial, including summary of relevant studies (published and unpublished) examining benefits and harms for each intervention                                                               | <a href="#">3-4-5</a>                           |
|                                                           | 6b  | Explanation for choice of comparators                                                                                                                                                                                                                            | 4                                               |
| Objectives                                                | 7   | Specific objectives or hypotheses                                                                                                                                                                                                                                | 4                                               |
| Trial design                                              | 8   | Description of trial design including type of trial (eg, parallel group, crossover, factorial, single group), allocation ratio, and framework (eg, superiority, equivalence, noninferiority, exploratory)                                                        | 4                                               |
| <b>Methods: Participants, interventions, and outcomes</b> |     |                                                                                                                                                                                                                                                                  |                                                 |
| Study setting                                             | 9   | Description of study settings (eg, community clinic, academic hospital) and list of countries where data will be collected. Reference to where list of study sites can be obtained                                                                               | <a href="#">6-7-5</a>                           |
| Eligibility criteria                                      | 10  | Inclusion and exclusion criteria for participants. If applicable, eligibility criteria for study centres and individuals who will perform the interventions (eg, surgeons, psychotherapists)                                                                     | <a href="#">6-7-9</a> (Box <a href="#">21</a> ) |
| Interventions                                             | 11a | Interventions for each group with sufficient detail to allow replication, including how and when they will be administered                                                                                                                                       | <a href="#">97</a>                              |
|                                                           | 11b | Criteria for discontinuing or modifying allocated interventions for a given trial participant (eg, drug dose change in response to harms, participant request, or improving/worsening disease)                                                                   | <a href="#">6-7-9</a> (Box <a href="#">21</a> ) |
|                                                           | 11c | Strategies to improve adherence to intervention protocols, and any procedures for monitoring adherence (eg, drug tablet return, laboratory tests)                                                                                                                | <a href="#">9, 147, 13</a>                      |
|                                                           | 11d | Relevant concomitant care and interventions that are permitted or prohibited during the trial                                                                                                                                                                    | <a href="#">6-7-9</a> (Box <a href="#">21</a> ) |

|    |                      |    |                                                                                                                                                                                                                                                                                                                                                                                |                                                            |
|----|----------------------|----|--------------------------------------------------------------------------------------------------------------------------------------------------------------------------------------------------------------------------------------------------------------------------------------------------------------------------------------------------------------------------------|------------------------------------------------------------|
| 1  | Outcomes             | 12 | Primary, secondary, and other outcomes, including the specific measurement variable (eg, systolic blood pressure), analysis metric (eg, change from baseline, final value, time to event), method of aggregation (eg, median, proportion), and time point for each outcome. Explanation of the clinical relevance of chosen efficacy and harm outcomes is strongly recommended | <a href="#">4-6 (Box 1)</a> , <sup>17</sup> trial registry |
| 2  |                      |    |                                                                                                                                                                                                                                                                                                                                                                                |                                                            |
| 3  |                      |    |                                                                                                                                                                                                                                                                                                                                                                                |                                                            |
| 4  |                      |    |                                                                                                                                                                                                                                                                                                                                                                                |                                                            |
| 5  |                      |    |                                                                                                                                                                                                                                                                                                                                                                                |                                                            |
| 6  | Participant timeline | 13 | Time schedule of enrolment, interventions (including any run-ins and washouts), assessments, and visits for participants. A schematic diagram is highly recommended (see Figure)                                                                                                                                                                                               | Table 1; Figures 1-2                                       |
| 7  |                      |    |                                                                                                                                                                                                                                                                                                                                                                                |                                                            |
| 8  |                      |    |                                                                                                                                                                                                                                                                                                                                                                                |                                                            |
| 9  | Sample size          | 14 | Estimated number of participants needed to achieve study objectives and how it was determined, including clinical and statistical assumptions supporting any sample size calculations                                                                                                                                                                                          | <a href="#">97</a>                                         |
| 10 |                      |    |                                                                                                                                                                                                                                                                                                                                                                                |                                                            |
| 11 |                      |    |                                                                                                                                                                                                                                                                                                                                                                                |                                                            |
| 12 |                      |    |                                                                                                                                                                                                                                                                                                                                                                                |                                                            |
| 13 | Recruitment          | 15 | Strategies for achieving adequate participant enrolment to reach target sample size                                                                                                                                                                                                                                                                                            | <a href="#">97</a>                                         |
| 14 |                      |    |                                                                                                                                                                                                                                                                                                                                                                                |                                                            |
| 15 |                      |    |                                                                                                                                                                                                                                                                                                                                                                                |                                                            |

### Methods: Assignment of interventions (for controlled trials)

#### Allocation:

|    |                                  |     |                                                                                                                                                                                                                                                                                                                                                          |                               |
|----|----------------------------------|-----|----------------------------------------------------------------------------------------------------------------------------------------------------------------------------------------------------------------------------------------------------------------------------------------------------------------------------------------------------------|-------------------------------|
| 19 |                                  |     |                                                                                                                                                                                                                                                                                                                                                          |                               |
| 20 | Sequence generation              | 16a | Method of generating the allocation sequence (eg, computer-generated random numbers), and list of any factors for stratification. To reduce predictability of a random sequence, details of any planned restriction (eg, blocking) should be provided in a separate document that is unavailable to those who enrol participants or assign interventions | <a href="#">10-118</a>        |
| 21 |                                  |     |                                                                                                                                                                                                                                                                                                                                                          |                               |
| 22 |                                  |     |                                                                                                                                                                                                                                                                                                                                                          |                               |
| 23 |                                  |     |                                                                                                                                                                                                                                                                                                                                                          |                               |
| 24 |                                  |     |                                                                                                                                                                                                                                                                                                                                                          |                               |
| 25 | Allocation concealment mechanism | 16b | Mechanism of implementing the allocation sequence (eg, central telephone; sequentially numbered, opaque, sealed envelopes), describing any steps to conceal the sequence until interventions are assigned                                                                                                                                                | <a href="#">10-118</a>        |
| 26 |                                  |     |                                                                                                                                                                                                                                                                                                                                                          |                               |
| 27 |                                  |     |                                                                                                                                                                                                                                                                                                                                                          |                               |
| 28 |                                  |     |                                                                                                                                                                                                                                                                                                                                                          |                               |
| 29 | Implementation                   | 16c | Who will generate the allocation sequence, who will enrol participants, and who will assign participants to interventions                                                                                                                                                                                                                                | <a href="#">10-118</a>        |
| 30 |                                  |     |                                                                                                                                                                                                                                                                                                                                                          |                               |
| 31 |                                  |     |                                                                                                                                                                                                                                                                                                                                                          |                               |
| 32 |                                  |     |                                                                                                                                                                                                                                                                                                                                                          |                               |
| 33 | Blinding (masking)               | 17a | Who will be blinded after assignment to interventions (eg, trial participants, care providers, outcome assessors, data analysts), and how                                                                                                                                                                                                                | <a href="#">10-11, 17-188</a> |
| 34 |                                  |     |                                                                                                                                                                                                                                                                                                                                                          |                               |
| 35 |                                  |     |                                                                                                                                                                                                                                                                                                                                                          |                               |
| 36 |                                  | 17b | If blinded, circumstances under which unblinding is permissible, and procedure for revealing a participant's allocated intervention during the trial                                                                                                                                                                                                     | <a href="#">108</a>           |
| 37 |                                  |     |                                                                                                                                                                                                                                                                                                                                                          |                               |
| 38 |                                  |     |                                                                                                                                                                                                                                                                                                                                                          |                               |
| 39 |                                  |     |                                                                                                                                                                                                                                                                                                                                                          |                               |

### Methods: Data collection, management, and analysis

|    |                                 |     |                                                                                                                                                                                                                                                                                                                                                                                                              |                            |  |
|----|---------------------------------|-----|--------------------------------------------------------------------------------------------------------------------------------------------------------------------------------------------------------------------------------------------------------------------------------------------------------------------------------------------------------------------------------------------------------------|----------------------------|--|
| 1  | Data collection methods         | 18a | Plans for assessment and collection of outcome, baseline, and other trial data, including any related processes to promote data quality (eg, duplicate measurements, training of assessors) and a description of study instruments (eg, questionnaires, laboratory tests) along with their reliability and validity, if known. Reference to where data collection forms can be found, if not in the protocol | <a href="#">10-169-13</a>  |  |
| 2  |                                 |     |                                                                                                                                                                                                                                                                                                                                                                                                              |                            |  |
| 3  |                                 |     |                                                                                                                                                                                                                                                                                                                                                                                                              |                            |  |
| 4  |                                 |     |                                                                                                                                                                                                                                                                                                                                                                                                              |                            |  |
| 5  |                                 |     |                                                                                                                                                                                                                                                                                                                                                                                                              |                            |  |
| 6  |                                 | 18b | Plans to promote participant retention and complete follow-up, including list of any outcome data to be collected for participants who discontinue or deviate from intervention protocols                                                                                                                                                                                                                    | <a href="#">10, 157</a>    |  |
| 7  |                                 |     |                                                                                                                                                                                                                                                                                                                                                                                                              |                            |  |
| 8  | Data management                 | 19  | Plans for data entry, coding, security, and storage, including any related processes to promote data quality (eg, double data entry; range checks for data values). Reference to where details of data management procedures can be found, if not in the protocol                                                                                                                                            | <a href="#">16-1713-14</a> |  |
| 9  |                                 |     |                                                                                                                                                                                                                                                                                                                                                                                                              |                            |  |
| 10 |                                 |     |                                                                                                                                                                                                                                                                                                                                                                                                              |                            |  |
| 11 | Statistical methods             | 20a | Statistical methods for analysing primary and secondary outcomes. Reference to where other details of the statistical analysis plan can be found, if not in the protocol                                                                                                                                                                                                                                     | <a href="#">1814</a>       |  |
| 12 |                                 |     |                                                                                                                                                                                                                                                                                                                                                                                                              |                            |  |
| 13 |                                 |     |                                                                                                                                                                                                                                                                                                                                                                                                              |                            |  |
| 14 |                                 |     |                                                                                                                                                                                                                                                                                                                                                                                                              |                            |  |
| 15 |                                 | 20b | Methods for any additional analyses (eg, subgroup and adjusted analyses)                                                                                                                                                                                                                                                                                                                                     | <a href="#">1814</a>       |  |
| 16 |                                 |     |                                                                                                                                                                                                                                                                                                                                                                                                              |                            |  |
| 17 |                                 | 20c | Definition of analysis population relating to protocol non-adherence (eg, as randomised analysis), and any statistical methods to handle missing data (eg, multiple imputation)                                                                                                                                                                                                                              | <a href="#">1814</a>       |  |
| 18 |                                 |     |                                                                                                                                                                                                                                                                                                                                                                                                              |                            |  |
| 19 |                                 |     |                                                                                                                                                                                                                                                                                                                                                                                                              |                            |  |
| 20 |                                 |     |                                                                                                                                                                                                                                                                                                                                                                                                              |                            |  |
| 21 |                                 |     |                                                                                                                                                                                                                                                                                                                                                                                                              |                            |  |
| 22 |                                 |     |                                                                                                                                                                                                                                                                                                                                                                                                              |                            |  |
| 23 | <b>Methods: Monitoring</b>      |     |                                                                                                                                                                                                                                                                                                                                                                                                              |                            |  |
| 24 |                                 |     |                                                                                                                                                                                                                                                                                                                                                                                                              |                            |  |
| 25 | Data monitoring                 | 21a | Composition of data monitoring committee (DMC); summary of its role and reporting structure; statement of whether it is independent from the sponsor and competing interests; and reference to where further details about its charter can be found, if not in the protocol. Alternatively, an explanation of why a DMC is not needed                                                                        | <a href="#">15-1813-14</a> |  |
| 26 |                                 |     |                                                                                                                                                                                                                                                                                                                                                                                                              |                            |  |
| 27 |                                 | 21b | Description of any interim analyses and stopping guidelines, including who will have access to these interim results and make the final decision to terminate the trial                                                                                                                                                                                                                                      | <a href="#">1713-14</a>    |  |
| 28 |                                 |     |                                                                                                                                                                                                                                                                                                                                                                                                              |                            |  |
| 29 |                                 |     |                                                                                                                                                                                                                                                                                                                                                                                                              |                            |  |
| 30 |                                 |     |                                                                                                                                                                                                                                                                                                                                                                                                              |                            |  |
| 31 | Harms                           | 22  | Plans for collecting, assessing, reporting, and managing solicited and spontaneously reported adverse events and other unintended effects of trial interventions or trial conduct                                                                                                                                                                                                                            | <a href="#">1513-14</a>    |  |
| 32 |                                 |     |                                                                                                                                                                                                                                                                                                                                                                                                              |                            |  |
| 33 |                                 |     |                                                                                                                                                                                                                                                                                                                                                                                                              |                            |  |
| 34 | Auditing                        | 23  | Frequency and procedures for auditing trial conduct, if any, and whether the process will be independent from investigators and the sponsor                                                                                                                                                                                                                                                                  | <a href="#">1613-14</a>    |  |
| 35 |                                 |     |                                                                                                                                                                                                                                                                                                                                                                                                              |                            |  |
| 36 |                                 |     |                                                                                                                                                                                                                                                                                                                                                                                                              |                            |  |
| 37 |                                 |     |                                                                                                                                                                                                                                                                                                                                                                                                              |                            |  |
| 38 |                                 |     |                                                                                                                                                                                                                                                                                                                                                                                                              |                            |  |
| 39 |                                 |     |                                                                                                                                                                                                                                                                                                                                                                                                              |                            |  |
| 40 |                                 |     |                                                                                                                                                                                                                                                                                                                                                                                                              |                            |  |
| 41 | <b>Ethics and dissemination</b> |     |                                                                                                                                                                                                                                                                                                                                                                                                              |                            |  |
| 42 |                                 |     |                                                                                                                                                                                                                                                                                                                                                                                                              |                            |  |
| 43 |                                 |     |                                                                                                                                                                                                                                                                                                                                                                                                              |                            |  |
| 44 |                                 |     |                                                                                                                                                                                                                                                                                                                                                                                                              |                            |  |
| 45 |                                 |     |                                                                                                                                                                                                                                                                                                                                                                                                              |                            |  |
| 46 |                                 |     |                                                                                                                                                                                                                                                                                                                                                                                                              |                            |  |

|    |                               |     |                                                                                                                                                                                                                                                                                     |                              |
|----|-------------------------------|-----|-------------------------------------------------------------------------------------------------------------------------------------------------------------------------------------------------------------------------------------------------------------------------------------|------------------------------|
| 1  | Research ethics approval      | 24  | Plans for seeking research ethics committee/institutional review board (REC/IRB) approval                                                                                                                                                                                           | 1, 2, <u>7</u> , <u>175</u>  |
| 2  |                               |     |                                                                                                                                                                                                                                                                                     |                              |
| 3  |                               |     |                                                                                                                                                                                                                                                                                     |                              |
| 4  | Protocol amendments           | 25  | Plans for communicating important protocol modifications (eg, changes to eligibility criteria, outcomes, analyses) to relevant parties (eg, investigators, REC/IRBs, trial participants, trial registries, journals, regulators)                                                    | <u>75</u>                    |
| 5  |                               |     |                                                                                                                                                                                                                                                                                     |                              |
| 6  |                               |     |                                                                                                                                                                                                                                                                                     |                              |
| 7  |                               |     |                                                                                                                                                                                                                                                                                     |                              |
| 8  | Consent or assent             | 26a | Who will obtain informed consent or assent from potential trial participants or authorised surrogates, and how (see Item 32)                                                                                                                                                        | <u>9-107-8</u>               |
| 9  |                               |     |                                                                                                                                                                                                                                                                                     |                              |
| 10 |                               |     |                                                                                                                                                                                                                                                                                     |                              |
| 11 |                               | 26b | Additional consent provisions for collection and use of participant data and biological specimens in ancillary studies, if applicable                                                                                                                                               | N/A                          |
| 12 |                               |     |                                                                                                                                                                                                                                                                                     |                              |
| 13 |                               |     |                                                                                                                                                                                                                                                                                     |                              |
| 14 | Confidentiality               | 27  | How personal information about potential and enrolled participants will be collected, shared, and maintained in order to protect confidentiality before, during, and after the trial                                                                                                | <u>15-16</u><br><u>13-14</u> |
| 15 |                               |     |                                                                                                                                                                                                                                                                                     |                              |
| 16 |                               |     |                                                                                                                                                                                                                                                                                     |                              |
| 17 |                               |     |                                                                                                                                                                                                                                                                                     |                              |
| 18 | Declaration of interests      | 28  | Financial and other competing interests for principal investigators for the overall trial and each study site                                                                                                                                                                       | <u>184,16</u>                |
| 19 |                               |     |                                                                                                                                                                                                                                                                                     |                              |
| 20 |                               |     |                                                                                                                                                                                                                                                                                     |                              |
| 21 | Access to data                | 29  | Statement of who will have access to the final trial dataset, and disclosure of contractual agreements that limit such access for investigators                                                                                                                                     | <u>1, 10, 16-1813</u>        |
| 22 |                               |     |                                                                                                                                                                                                                                                                                     |                              |
| 23 |                               |     |                                                                                                                                                                                                                                                                                     |                              |
| 24 | Ancillary and post-trial care | 30  | Provisions, if any, for ancillary and post-trial care, and for compensation to those who suffer harm from trial participation                                                                                                                                                       | 13                           |
| 25 |                               |     |                                                                                                                                                                                                                                                                                     |                              |
| 26 |                               |     |                                                                                                                                                                                                                                                                                     |                              |
| 27 | Dissemination policy          | 31a | Plans for investigators and sponsor to communicate trial results to participants, healthcare professionals, the public, and other relevant groups (eg, via publication, reporting in results databases, or other data sharing arrangements), including any publication restrictions | <u>1, 2, 1714</u>            |
| 28 |                               |     |                                                                                                                                                                                                                                                                                     |                              |
| 29 |                               |     |                                                                                                                                                                                                                                                                                     |                              |
| 30 |                               |     |                                                                                                                                                                                                                                                                                     |                              |
| 31 |                               |     |                                                                                                                                                                                                                                                                                     |                              |
| 32 |                               | 31b | Authorship eligibility guidelines and any intended use of professional writers                                                                                                                                                                                                      | <u>1716</u>                  |
| 33 |                               |     |                                                                                                                                                                                                                                                                                     |                              |
| 34 |                               | 31c | Plans, if any, for granting public access to the full protocol, participant-level dataset, and statistical code                                                                                                                                                                     | <u>1816</u> ; trial registry |
| 35 |                               |     |                                                                                                                                                                                                                                                                                     |                              |
| 36 |                               |     |                                                                                                                                                                                                                                                                                     |                              |
| 37 | <b>Appendices</b>             |     |                                                                                                                                                                                                                                                                                     |                              |
| 38 | Informed consent materials    | 32  | Model consent form and other related documentation given to participants and authorised surrogates                                                                                                                                                                                  | Supplementary material       |
| 39 |                               |     |                                                                                                                                                                                                                                                                                     |                              |
| 40 |                               |     |                                                                                                                                                                                                                                                                                     |                              |
| 41 |                               |     |                                                                                                                                                                                                                                                                                     |                              |
| 42 |                               |     |                                                                                                                                                                                                                                                                                     |                              |
| 43 |                               |     |                                                                                                                                                                                                                                                                                     |                              |
| 44 |                               |     |                                                                                                                                                                                                                                                                                     |                              |
| 45 |                               |     |                                                                                                                                                                                                                                                                                     |                              |
| 46 |                               |     |                                                                                                                                                                                                                                                                                     |                              |

1  
2  
3  
4  
5  
6  
7  
8  
9  
10  
11  
12  
13  
14  
15  
16  
17  
18  
19  
20  
21  
22  
23  
24  
25  
26  
27  
28  
29  
30  
31  
32  
33  
34  
35  
36  
37  
38  
39  
40  
41  
42  
43  
44  
45  
46

|                      |    |                                                                                                                                                                                                |             |
|----------------------|----|------------------------------------------------------------------------------------------------------------------------------------------------------------------------------------------------|-------------|
| Biological specimens | 33 | Plans for collection, laboratory evaluation, and storage of biological specimens for genetic or molecular analysis in the current trial and for future use in ancillary studies, if applicable | <u>1344</u> |
|----------------------|----|------------------------------------------------------------------------------------------------------------------------------------------------------------------------------------------------|-------------|

---

\*It is strongly recommended that this checklist be read in conjunction with the SPIRIT 2013 Explanation & Elaboration for important clarification on the items. Amendments to the protocol should be tracked and dated. The SPIRIT checklist is copyrighted by the SPIRIT Group under the Creative Commons [“Attribution-NonCommercial-NoDerivs 3.0 Unported”](#) license.

For peer review only

# BMJ Open

**Cannabinol (CBN; 30 and 300 mg) effects on sleep and next-day function in insomnia disorder ('CUPID' study): Protocol for a randomised, double-blind, placebo-controlled, crossover, three-arm, proof-of-concept trial.**

|                                 |                                                                                                                                                                                                                                                                                                                                                                                                                                                                                                                                                                                                                                                                                                                                                                                                                                                                                                                                                                                                                                                                                                                                                                                                                                                                                                                                                                                                                                                                                                                                                                                                                                                                                                                                                                                                                                                                                                            |
|---------------------------------|------------------------------------------------------------------------------------------------------------------------------------------------------------------------------------------------------------------------------------------------------------------------------------------------------------------------------------------------------------------------------------------------------------------------------------------------------------------------------------------------------------------------------------------------------------------------------------------------------------------------------------------------------------------------------------------------------------------------------------------------------------------------------------------------------------------------------------------------------------------------------------------------------------------------------------------------------------------------------------------------------------------------------------------------------------------------------------------------------------------------------------------------------------------------------------------------------------------------------------------------------------------------------------------------------------------------------------------------------------------------------------------------------------------------------------------------------------------------------------------------------------------------------------------------------------------------------------------------------------------------------------------------------------------------------------------------------------------------------------------------------------------------------------------------------------------------------------------------------------------------------------------------------------|
| Journal:                        | <i>BMJ Open</i>                                                                                                                                                                                                                                                                                                                                                                                                                                                                                                                                                                                                                                                                                                                                                                                                                                                                                                                                                                                                                                                                                                                                                                                                                                                                                                                                                                                                                                                                                                                                                                                                                                                                                                                                                                                                                                                                                            |
| Manuscript ID                   | bmjopen-2022-071148.R2                                                                                                                                                                                                                                                                                                                                                                                                                                                                                                                                                                                                                                                                                                                                                                                                                                                                                                                                                                                                                                                                                                                                                                                                                                                                                                                                                                                                                                                                                                                                                                                                                                                                                                                                                                                                                                                                                     |
| Article Type:                   | Protocol                                                                                                                                                                                                                                                                                                                                                                                                                                                                                                                                                                                                                                                                                                                                                                                                                                                                                                                                                                                                                                                                                                                                                                                                                                                                                                                                                                                                                                                                                                                                                                                                                                                                                                                                                                                                                                                                                                   |
| Date Submitted by the Author:   | 04-Aug-2023                                                                                                                                                                                                                                                                                                                                                                                                                                                                                                                                                                                                                                                                                                                                                                                                                                                                                                                                                                                                                                                                                                                                                                                                                                                                                                                                                                                                                                                                                                                                                                                                                                                                                                                                                                                                                                                                                                |
| Complete List of Authors:       | <p>Lavender, Isobel; Woolcock Institute of Medical Research, Centre for Sleep and Chronobiology; The University of Sydney Lambert Initiative for Cannabinoid Therapeutics,<br/>           McCartney, Danielle; Woolcock Institute of Medical Research, Centre for Sleep and Chronobiology; Woolcock Institute of Medical Research, Sleep and Circadian Research Group<br/>           Marshall, Nathaniel; Woolcock Institute of Medical Research, Centre for Sleep and Chronobiology; Macquarie University Faculty of Medicine and Health Sciences<br/>           Surraev, Anastasia; Woolcock Institute of Medical Research, Centre for Sleep and Chronobiology; The University of Sydney Lambert Initiative for Cannabinoid Therapeutics,<br/>           Irwin, Chris; Griffith University, Menzies Health Institute Queensland, School Allied Health Sciences<br/>           D'Rozario, Angela; Woolcock Institute of Medical Research, Centre for Sleep and Chronobiology; Macquarie University Faculty of Medicine and Health Sciences<br/>           Gordon, Christopher J.; Woolcock Institute of Medical Research, Centre for Sleep and Chronobiology; The University of Sydney Susan Wakil School of Nursing and Midwifery<br/>           Saini, Bandana; Woolcock Institute of Medical Research, Centre for Sleep and Chronobiology<br/>           Grunstein, R; Woolcock Institute of Medical Research, Centre for Sleep and Chronobiology; Royal Prince Alfred Hospital<br/>           Yee, Brendon; Woolcock Institute of Medical Research, Centre for Sleep and Chronobiology; Royal Prince Alfred Hospital<br/>           McGregor, Iain; University of Sydney, Lambert Initiative for Cannabinoid Therapeutics<br/>           Hoyos, Camilla; Woolcock Institute of Medical Research, Centre for Sleep and Chronobiology; Macquarie University Faculty of Medicine and Health Sciences</p> |
| <b>Primary Subject Heading</b>: | Research methods                                                                                                                                                                                                                                                                                                                                                                                                                                                                                                                                                                                                                                                                                                                                                                                                                                                                                                                                                                                                                                                                                                                                                                                                                                                                                                                                                                                                                                                                                                                                                                                                                                                                                                                                                                                                                                                                                           |
| Secondary Subject Heading:      | Pharmacology and therapeutics, Qualitative research, Evidence based practice, Medical publishing and peer review, Patient-centred medicine                                                                                                                                                                                                                                                                                                                                                                                                                                                                                                                                                                                                                                                                                                                                                                                                                                                                                                                                                                                                                                                                                                                                                                                                                                                                                                                                                                                                                                                                                                                                                                                                                                                                                                                                                                 |



1  
2  
3  
4  
5  
6  
7  
8  
9  
10  
11  
12  
13  
14  
15  
16  
17  
18  
19  
20  
21  
22  
23  
24  
25  
26  
27  
28  
29  
30  
31  
32  
33  
34  
35  
36  
37  
38  
39  
40  
41  
42  
43  
44  
45  
46  
47  
48  
49  
50  
51  
52  
53  
54  
55  
56  
57  
58  
59  
60

|           |                                                                               |
|-----------|-------------------------------------------------------------------------------|
| Keywords: | SLEEP MEDICINE, STATISTICS & RESEARCH METHODS, Clinical trials < THERAPEUTICS |
|           |                                                                               |

SCHOLARONE™  
Manuscripts

1  
2  
3 1 **Cannabinol (CBN; 30 and 300 mg) effects on sleep and next-day function in insomnia disorder**  
4 2 **(‘CUPID’ study): Protocol for a randomised, double-blind, placebo-controlled, crossover, three-**  
5 3 **arm, proof-of-concept trial.**  
6  
7 4  
8 5

9 6 Isobel Lavender<sup>1,2,3</sup>

10 7 Danielle McCartney<sup>1,2,3</sup>

11 8 Nathaniel S Marshall<sup>1,5</sup>

12 9 Anastasia Suraev<sup>1,2,4</sup>

13 10 Christopher Irwin<sup>6</sup>

14 11 Angela L D’Rozario<sup>1,3,5</sup>

15 12 Christopher Gordon<sup>1,8</sup>

16 13 Bandana Saini<sup>1</sup>

17 14 Ronald R Grunstein<sup>1,4,8</sup>

18 15 Brendon J Yee<sup>1,4,8</sup>

19 16 Iain S McGregor<sup>2,3</sup>

20 17 Camilla M Hoyos<sup>1,5</sup>

21 18  
22 19 <sup>1</sup>Centre for Sleep and Chronobiology, Woolcock Institute of Medical Research, Macquarie University,  
23 20 Sydney, New South Wales, Australia

24 21 <sup>2</sup>Lambert Initiative for Cannabinoid Therapeutics, Brain and Mind Centre, The University of Sydney,  
25 22 Sydney, New South Wales, Australia

26 23 <sup>3</sup>Faculty of Science, School of Psychology, The University of Sydney, Sydney, New South Wales,  
27 24 Australia

28 25 <sup>4</sup>Faculty of Medicine and Health, School of Medical Sciences, University of Sydney, New South Wales,  
29 26 Australia

30 27 <sup>5</sup>Faculty of Medicine, Health and Human Sciences, Macquarie University, Sydney, Australia

31 28 <sup>6</sup>School of Health Sciences and Social Work, Menzies Health Institute Queensland, Griffith University,  
32 29 Gold Coast, Queensland, Australia

33 30 <sup>7</sup>Susan Wakil School of Nursing and Midwifery, University of Sydney, New South Wales, Australia

34 31 <sup>8</sup>CPC-RPA clinic, Royal Prince Alfred Hospital, Sydney, New South Wales, Australia

35 32  
36 33  
37 34 **Ethics and dissemination:** Human Research Ethics Committee approval has been granted by Bellberry  
38 35 Limited (2021-08-907). Study findings will be published as open-access in a peer-reviewed journal and  
39 36 presented at academic conferences.  
40 37

41 38 **ClinicalTrials.gov Identifier:** NCT05344170  
42 39

43 40 **Correspondence**

44 41 Dr Camilla Hoyos, Woolcock Institute of Medical Research, Sydney, New South Wales, Australia.

45 42 Email: [camilla.hoyos@mq.edu.au](mailto:camilla.hoyos@mq.edu.au)  
46 43

47 44 **Word count:** 5317  
48 45  
49  
50  
51  
52  
53  
54  
55  
56  
57  
58  
59  
60

**Abstract** (277/300 words)

**Objective:** Insomnia is the most prevalent sleep disorder, with few effective pharmacotherapies. Anecdotal reports and recent preclinical research suggest that cannabitol (CBN), a constituent of *Cannabis sativa* derived from delta-9-tetrahydrocannabinol (THC), could be an effective treatment. Despite this, the isolated effects of CBN on sleep have yet to be systematically studied in humans.

**Methods:** The present protocol paper describes a randomised, double-blind, placebo-controlled, single-dose, three-arm, crossover, proof-of-concept study which investigates the effects of CBN on sleep and next-day function in 20 participants with clinician-diagnosed insomnia disorder and an Insomnia Severity Index [ISI] Score  $\geq 15$ . Participants receive a single fixed oral liquid dose of 30 mg CBN, 300 mg CBN, and matched placebo, in random order on three treatment nights; each separated by a two-week washout period. Participants undergo overnight sleep assessment using in-laboratory polysomnography and next-day neurobehavioral function tests. The primary outcome is wake after sleep onset (WASO) minutes. Secondary outcomes include changes to traditional sleep staging, sleep onset latency, and absolute spectral power during non-rapid eye movement (NREM) sleep. Tertiary outcomes include changes to sleep spindles during NREM sleep, arousal indices, absolute spectral power during rapid eye movement (REM) sleep, and subjective sleep quality. Safety-related and exploratory outcomes include changes to next-day simulated driving performance, subjective mood and drug effects, postural sway, alertness and reaction time, overnight memory consolidation, pre and post subjective and objective sleepiness, and plasma, urinary, and salivary cannabinoid concentrations. The study will provide novel preliminary data on CBN efficacy and safety in insomnia disorder, which will inform larger clinical trials. **Ethics and Dissemination:** Human Research Ethics Committee approval has been granted by Bellberry Limited (2021-08-907). Study findings will be disseminated in a peer-reviewed journal and at academic conferences. ClinicalTrials.gov Identifier: NCT05344170.

**Key words:** Power Spectral Analysis; Resting Wake Electroencephalography; Psychomotor Vigilance Test; Karolinska Drowsiness Test; Karolinska Sleepiness Scale; Leeds Sleep Evaluation Questionnaire; Standard Deviation of Lateral Position; Liquid Chromatography–Mass Spectrometry.

**Strengths and limitations of the study**

- This study uses a randomised, double-blind, placebo-controlled, crossover design to investigate two active doses of CBN isolate on sleep and neurobehavioral function over ~17-hours using gold-standard objective measures, validated subjective measures, and rigorous design methodology.
- Study participants undergo extensive screening with a sleep physician to confirm insomnia disorder diagnosis, including an overnight diagnostic polysomnogram to rule out other sleep disorders that commonly co-occur with insomnia.
- The study washout period (2-weeks) was chosen to minimise participant burden, as participants cannot undergo insomnia treatment before (3-months) or during (~2 months) the protocol; however, this may lead to carry-over effects between doses as a recent crossover study demonstrated oral cannabinoids can persist in plasma for >4 weeks (1500 mg; single dose).
- The study involves a single-dose, in-laboratory proof-of-concept design and results may, therefore, lack ecological validity (repeated CBN dosing may be necessary to effectively treat insomnia).

## Background

Insomnia is a sleep disorder characterised by subjective difficulty falling asleep, maintaining sleep, and/or achieving restorative sleep, where symptoms persist for  $\geq 3$ -months and are accompanied by daytime sequelae of dysfunction and/or distress.[1] Insomnia disorder is the most prevalent sleep disorder which affects between 10–30% of adults[2] and persists in 37% of cases at 5-year follow-up.[3] Insomnia disorder increases the risk of mental and physical illnesses such as depression [4] and dementia.[5] The economic burden of insomnia disorder is estimated at  $> \$13$  billion per annum in Australia.[6]

Insomnia disorder treatments are typically behavioral or pharmacological in nature. Cognitive behavioural therapy for insomnia (CBTi) is the first-line treatment and its efficacy has been confirmed in recent meta-analyses.[7] Nevertheless, significant access barriers to CBTi exist including limited providers, high cost,[8] and delayed perception of subjective benefits.[9] CBTi may also be less effective in individuals with shorter sleep duration (i.e.,  $< 6$  hours/night).[10] As such, sedative-hypnotics are commonly used in primary care.[7] While effective in the short-term, well-documented side effects include daytime sedation, psychomotor impairment, addiction/dependence, and premature mortality.[11] There is a clear need for safe pharmacological insomnia disorder treatments.

*Cannabis sativa* is a complex plant containing numerous potentially therapeutic chemical compounds, including over 140 constituent ‘cannabinoids’.[12] As historical legal prohibitions against cannabis are relaxed, cannabinoids are being increasingly used to aid sleep.[13] The most well researched cannabinoids are  $\Delta^9$ -tetrahydrocannabinol (THC) and cannabidiol (CBD); however, in recent times, *cannabinol* (CBN) has become recognized as a putative ‘sleep-enhancing’ cannabinoid.[14] CBN is produced via the nonenzymatic oxidation of THC and is therefore present at higher concentrations in aged (rather than ‘young’) cannabis plant material.[15] This is significant as aged cannabis plant material is anecdotally reported to induce sleep.[16] CBN products are also being sold as sleep aids in unregulated markets.[17] Importantly, a recent narrative review of CBN highlighted insufficient evidence to support sleep-related claims, despite a plausible mechanism of action.

THC and CBN exert some of their physiological effects via interactions with the *endogenous cannabinoid system* (ECS)[12], comprising of signaling molecules termed ‘*endocannabinoids*’ (e.g., anandamide, 2-Arachidonoylglycerol [2-AG]), their receptors, and enzymes.[18, 19] The ECS is involved in regulating a myriad of biological processes including circadian rhythmicity[20]. Systematic administration of anandamide has been shown to promote sleep in rodents and humans [18, 21, 22] via activation of the cannabinoid receptor 1 (CB<sub>1</sub>R).[21, 23] As such, the CB<sub>1</sub>R is considered a promising therapeutic target.[24] The pharmacological effects of THC occur via partial agonism at CB<sub>1</sub>R[25] and can include acute intoxication, psychomotor impairment, sedation, and changes in sleep architecture.[18] CBN also has agonist actions at CB<sub>1</sub>R, albeit approximately 10-times less potent than THC[25] which may potentially account for the low levels of intoxication reported in historic CBN studies.[26, 27] Minimal intoxication could render CBN a more practical and safer alternative to THC as a sleep aid.

Two recent clinical studies administered small quantities of CBN in multi-cannabinoid formulations.[28, 29] The first, a crossover randomized controlled trial (RCT) with a one-week washout, investigated two-weeks of an oral liquid containing 20 mg THC, 2 mg CBN, and 1 mg CBD in 20 adults with insomnia disorder. The drug significantly improved insomnia disorder symptoms (Insomnia Severity Index [ISI] -5.1 points,  $p=0.0001$ ,  $d=0.94$ ) compared to placebo, with no significant changes to polysomnography (measured on night 14 of dosing).[28] In an interventional open-label

1 study, current medicinal cannabis users with subjective sleep difficulty reported improved sleep  
2 (assessed via an unvalidated subjective survey and a validated non-contact at-home tracking device)  
3 after three weeks of nightly administration of an oral capsule containing 10 mg THC and 5 mg  
4 CBN.[29] Importantly, the effects of CBN cannot be disentangled from those of THC in these studies.  
5 We are not aware of any clinical studies to-date that have tested the isolated effects of CBN on  
6 objectively measured human sleep.

7  
8 Importantly, a recently published conference abstract reported on a preclinical study in which CBN  
9 isolate (10, 30, and 100 mg/kg intraperitoneally compared with zolpidem 10 mg/kg as a positive control)  
10 increased the proportion of non-rapid eye movement (NREM) sleep and sleep bout duration 4-hours  
11 post administration in Long-Evan rats.[30] With the lowest dose, biphasic effects were observed – CBN  
12 (10mg/kg) initially decreased rapid eye movement (REM) sleep proportion; however, 4 hours after  
13 administration, a significant increase in the percentage of REM sleep occurred. These results suggest  
14 CBN could reduce wake after sleep onset (WASO), given such delayed effects on sleep.

### 15 16 Study design and aim

17 Here we described the protocol for a randomised, double-blinded, placebo-controlled, three-arm,  
18 crossover, single-site, proof-of-concept study design to investigate the acute effects of oral CBN on  
19 sleep and next-day function in 20 participants with clinician-diagnosed insomnia disorder. The primary  
20 study aim is to investigate the effects of CBN (30 and 300 mg) versus placebo on sleep in insomnia  
21 disorder. The study evaluates the safety and efficacy of CBN as a pharmacological therapy and generate  
22 preliminary data to inform larger clinical trials. Many outcome measures used in insomnia disorder  
23 clinical trials are known to be susceptible to placebo effects. A placebo control is scientifically and  
24 ethically defensible choice as the effects of CBN on human sleep are unknown and could not be properly  
25 elucidated if an active treatment such as zolpidem was the comparator rather than placebo.

### 26 27 Study outcomes

28 The primary study outcome is WASO measured in minutes using in-laboratory overnight  
29 polysomnography, from the first epoch after lights out until the last epoch, scored as any stage of sleep  
30 by an experienced polysomnographic technician in accordance with American Academy of Sleep  
31 Medicine (AASM) 2020 Sleep Scoring criteria (Version 2.6).[31] Secondary study outcomes include:

- 32 1. Traditional sleep staging: Proportion of the sleep opportunity scored at the 5 stages (wake,  
33 and N1, N2, N3, and REM sleep) between lights out and lights on, measured using overnight  
34 in-laboratory polysomnography, scored by a polysomnography technician in accordance with  
35 AASM Sleep Scoring criteria.
- 36 2. Sleep Onset Latency (SOL): SOL measured in minutes using in-laboratory polysomnography,  
37 calculated from the time of lights out to the first sleep epoch as scored by a polysomnographic  
38 technician in accordance with AASM Sleep Scoring criteria.
- 39 3. Absolute Electroencephalographic (EEG) Power During NREM Sleep: Spectral power of  
40 delta (1-4.5 Hz), theta (4.5-8 Hz), alpha (8-12 Hz), sigma (12-15 Hz), beta (15-25 Hz), and  
41 gamma (25-40 Hz) frequency ranges between treatment arms. Power spectral analysis will be  
42 applied to EEG signals from polysomnography after artefacts are detected and removed.

43 Tertiary, safety, and exploratory study outcomes are described in Box 1 (see ClinicalTrials.gov  
44 Identifier: NCT05344170).

1 Box 1. *Tertiary, safety, and exploratory study outcomes*2 **Tertiary outcomes**

- 3 1. **Sleep Spindles During Non-Rapid Eye Movement (NREM) Sleep:** Sleep spindle and slow oscillation events in NREM sleep from in-laboratory overnight polysomnography. A sleep spindle and slow oscillation detection algorithm will be applied to electroencephalography (EEG) signals from polysomnography after artefacts are detected and removed. Comparisons between each CBN dose versus placebo.
- 4 2. **EEG Arousal Index:** Number of cortical arousals captured via the electroencephalogram per hour of sleep scored by the polysomnographic technician on the polysomnogram in accordance with AASM Sleep Scoring criteria. Comparisons between each CBN dose versus placebo.
- 5 3. **Absolute EEG Power During Rapid Eye Movement (REM) Sleep:** Spectral power of delta (1-4.5 Hz), theta (4.5-8 Hz), alpha (8-12 Hz), sigma (12-15 Hz), beta (15-25 Hz), and gamma (25-40 Hz) frequency ranges between treatment arms. Power spectral analysis will be applied to EEG signals from polysomnography after artefacts are detected and removed. Comparisons between each CBN dose versus placebo.
- 6 4. **Next-Day Post Wake Subjective Sleep Evaluation (LSEQ):** RCSQ score. LSEQ score. LSEQ scores range from 0-100, with higher scores indicating better subjective experience. Assessed within 1 h after wake (comparison between each CBN dose versus placebo).
- 7 5. **Next-Day Post Wake Subjective Sleep Evaluation (RCSQ):** RCSQ score. RCSQ scores range from 0-100, with higher scores indicating better subjective experience. Assessed within 1 h after wake (comparison between each CBN dose versus placebo).

8 **Safety outcomes**

- 9 1. **Standard Deviation of Lateral Position (SDLP) During Next-day Post-Wake Simulated Drive:** SDLP ("weaving") is measured across the 'standard', 'car following', and 'divided attention' sub-sections of a ~30 minute simulated driving task. Assessed within 2 h after wake (comparison between each CBN dose versus placebo)
- 10 2. **Speed During Next-day Post-Wake Simulated Drive:** Average speed and standard deviation of speed is measured across the 'standard' and 'divided attention' sub-sections of a ~30 minute simulated driving task. Assessed within 2 h after wake (comparison between each CBN dose versus placebo).
- 11 3. **Distance Headway During Next-day Post-Wake Simulated Drive:** Average distance headway (i.e., distance between the driver's vehicle and vehicle immediately in front) and standard deviation of distance headway is measured across the 'car following' sub-section of a ~30-minute simulated driving task. Assessed within 2 h after wake at both treatment sessions (comparison between each CBN dose versus placebo).
- 12 4. **Subjective Mood Evaluation:** The Abbreviated Profile of Mood States (POMS) consists of 40 items measuring domains of 'tension', 'depressed', 'anger', 'vigour', 'fatigue', and 'concentration'. Participants respond to each item using 5-point Likert scales ranging from 0 (Not at all) to 4 (Extremely). A total mood disturbance score is calculated by summing negative domains and subtracting positive domains. Administered pre and post drug administration, as well as next-day (comparison between each CBN dose versus placebo).
- 13 5. **Subjective Drug Effects:** The Drug Effects Questionnaire (DEQ) assesses the extent to which participants feel a drug effects, feel high, like the effects, dislike the effects, want more of the substance, and feel sedated, on self-rating 100mm visual analogue scales. A total mood disturbance score is calculated by summing negative domains and subtracting positive domains. Administered pre and post drug administration, as well as next-day (comparison between each CBN dose versus placebo).
- 14 6. **Postural Sway:** Centre-of-pressure (COP) during computerised static posturography. Administered pre and post drug administration, as well as next-day (comparison between each CBN dose versus placebo).
- 15 7. **Behavioural Alertness and Reaction Time:** Psychomotor Vigilance Test (PVT) is administered twice the next-day (comparison between each CBN dose versus placebo).



8. **Overnight Verbal Declarative Memory Consolidation:** Word pair recall scores measured using the computerised Word Pairs Task (WPT). Administered pre-drug administration and next-day (comparison between each CBN dose versus placebo).
9. **Overnight Procedural Memory Consolidation:** Motor sequence learning measured using the computerised Finger Tapping Task (FTT). Administered pre-drug administration and next-day (comparison between each CBN dose versus placebo).
10. **Resting Wake EEG Power After Sleep:** Resting wake EEG power during the Karolinska Drowsiness Test (KDT) upon wake: delta (1-4.5 Hz), theta (4.5-8 Hz), alpha (8-12 Hz), sigma (12-15 Hz), beta (15-25 Hz), and gamma (25-40 Hz) frequency ranges. Power spectral analysis is applied to EEG signals from polysomnography, after artefacts are detected and removed. Comparison between each CBN dose versus placebo.
11. **Subjective Sleepiness After Sleep:** The Karolinska Sleepiness Scale (KSS) is a 10-item measure of subjective drowsiness. Participants respond to each item using a 9-point Likert scale ranging from 1 (Extremely alert) to 9 (Extremely sleepy). Higher scores are indicative of increased drowsiness. The KSS will be collected in accordance with the KDT protocol but will not be analysed due to insufficient statistical power.

### Exploratory outcomes

1. **Resting Wake Electroencephalography (EEG) Power Before Sleep** (Acute Effects of CBN). Resting wake EEG power during the KDT prior to sleep: delta (1-4.5 Hz), theta (4.5-8 Hz), alpha (8-12 Hz), sigma (12-15 Hz), beta (15-25 Hz), and gamma (25-40 Hz) frequency ranges. Power spectral analysis is applied to EEG signals from polysomnography, after artefacts are detected and removed. Comparison between each CBN dose versus placebo.
2. **Subjective Sleepiness Before Sleep** (Acute Effects): The KSS is a 10-item measure of subjective drowsiness. Participants respond to each item using 9-point Likert scales ranging from 1 (Extremely alert) to 9 (Extremely sleepy). Higher scores are indicative of higher drowsiness. The KSS will be collected in accordance with the KDT protocol but will not be analysed due to insufficient statistical power.
3. **Plasma Cannabinoid Concentrations:** Presence of cannabinoids (CBN, delta-9-tetrahydrocannabinol [THC], and cannabidiol [CBD]) (e.g., 11-OH-CBN, 11-COOH-CBN, 11-OH-THC, 11-COOH-THC, 7-OH-CBD, 7-COOH-CBD), and endocannabinoids and related molecules (e.g., 2-Arachidonoylglycerol and anandamide) and their metabolites in plasma samples.
4. **Urinary Cannabinoid Concentrations:** Presence of cannabinoids (CBN, THC, and CBD) and their metabolites (11-OH-CBN, 11-COOH-CBN, 11-OH-THC, 11-COOH-THC, 7-OH-CBD, 7-COOH-CBD) in urine samples.
5. **Salivary Cannabinoid Concentrations:** Presence of cannabinoids (THC, CBN) and their metabolites (11-OH-CBN, 11-COOH-CBN, 11-OH-THC, 11-COOH-THC) in saliva samples.

### Safety

The investigational product, CBN, is currently a Schedule 9 'Prohibited Substance' in Australia.[32] The safety profile of CBN can be inferred from human studies conducted between 1973 and 1987. These studies explored oral doses up to 1200 mg CBN with some administering repeated daily doses of CBN for up to 4 weeks.[26, 33-35] There were no notable safety concerns, aberrations or toxicity concerns from these studies, with no adverse changes in parameters such as heart rate, blood pressure, body temperature, respiratory rate, perception, intoxication and postural stability.[26, 33-35] None of these studies measured sleep, sedation, or residual next-day effects of CBN (such as adverse effects on driving performance and cognitive function). These measures are obtained in the current study. CBN is currently being investigated as an analgesic agent (ClinicalTrials.gov Identifier: NCT03675971) and topical treatment for epidermolysis bullosa (ClinicalTrials.gov Identifier: NCT04908215). An RCT of oral CBN isolate (compared with combination CBN/CBD and placebo doses) on the subjective sleep

of healthy adults was retrospectively registered in May 2022 (ClinicalTrials.gov Identifier: NCT05839964). We will monitor and review safety reports from these trials as they become available.

## Methods

### Participants, interventions, and outcomes

#### Trial setting

The trial Sponsor and site is the Woolcock Institute of Medical Research, a specialist sleep and respiratory research institute and clinic (Sydney, Australia). The study funder is the Lambert Initiative for Cannabinoid Therapeutics, University of Sydney (Sydney, Australia), a philanthropically funded centre for cannabinoid science. Recruitment commenced in August 2022 and is anticipated to conclude in late 2023. The first participant was enrolled the 24<sup>th</sup> of August 2022 and the first participant was randomised on the 13<sup>th</sup> of October 2022. The study has ethical approval from Bellberry Limited Human Research Ethics Committee (HREC; 2021-08-907; Version 2.1, 01-Aug-2022) and is registered on ClinicalTrials.gov (Identifier: NCT05344170; 25-April-2022). The clinical trial protocol is available on request. Significant changes to the study protocol will be documented on ClinicalTrials.gov. The study protocol was developed according to the Standard Protocol Items: Recommendations for Interventional Trials (SPIRIT) 2013 statement.[36] The Therapeutics Goods Administration (TGA) has acknowledged the use of CBN in this study through the Clinical Trial Notification (CTN) scheme (CTN Number: CT-2022-CTN-00543-1).

#### Participant eligibility

Eligible participants are aged between 25-65 years with physician diagnosed insomnia disorder as per the International Classification of Sleep Disorders-3 (ICSD-3)[37] and Diagnostic and Statistical Manual of Mental Disorders, Fifth Edition (DSM-5)[38] criteria as determined by the study physician (see Box 2). The age range was selected to minimise age-related changes to sleep architecture.[39] As cannabinoids have been shown to improve symptoms (e.g., anxiety, pain) that commonly impair sleep (i.e., causing ‘secondary’ insomnia disorder),[40] a ‘primary’ insomnia disorder population is being recruited for this study.

### Box 2

#### *Inclusion and exclusion criteria for study participants*

Eligible individuals must fulfill the following criteria:

1. Between 25 – 65 years of age
2. Insomnia Severity Index (ISI) score  $\geq$  15 at eligibility screening
3. Insomnia disorder (symptoms occurring at least 3 times per week and present for longer than 3 months) as determined by the study physician
4. Ability to take oral medication
5. Provision of signed and dated informed consent form
6. Stated willingness to comply with all study procedures and availability for the duration of the study

Individuals who meet any of the following criteria are ineligible to participate in the study:

1. Medical condition or medication that is the cause of the insomnia disorder as determined by the study physician
2. Known hypersensitivity to cannabis or cannabinoid products (including if this becomes evident during the trial)

3. Reported use of cannabis or cannabinoid products within the past 3 months as confirmed by at least one negative urine drug screen (UDS) (or at the study physician's discretion)
4. Sleep apnoea (defined as Apnoea Hypopnea Index [AHI] >15 and Oxygen Desaturation Index [ODI]>10) as confirmed by polysomnography at screening
5. Sleep-related movement disorder as determined by the study physician
6. Delayed or advanced sleep phase syndrome (based on actigraphy and sleep diary) as confirmed during screening
7. Any medical condition that produces an abnormal EEG (i.e., epilepsy, brain injury)
8. Clinically relevant cardiovascular abnormalities as determined by the study physician and a 12-lead electrocardiogram (ECG) at screening
9. Shift work or trans meridian travel (two time zones) within the last month
10. History of major psychiatric disorder in the past 12 months at the study physician's discretion, except clinically managed mild depression and/or anxiety
11. History of suicide attempt or current suicide ideation (score greater than 1 on Q9 of the Patient Health Questionnaire [PHQ-9])[41]
12. Pregnancy or lactating. Female participants are required to complete a urine pregnancy test at screening and treatment sessions and all participants are instructed to use a reliable form of contraception throughout the study duration
13. History of drug or alcohol dependency or abuse within approximately the past 2 years
14. Use of CNS-active drugs (cannabis, amphetamines, cocaine, antidepressants, opioids, benzodiazepines) in the past 3 months as confirmed by a positive urine drug test at screening or at the study physician's discretion
15. Use of medications that may have a clinically significant impact upon the metabolism and excretion of cannabinoids as determined by the study physician (e.g., CYP450 enzyme inducers/inhibitors)
16. Excessive caffeine use that in the opinion of the study physician contributes to the participant's insomnia disorder, or the inability to abstain from caffeine use 24 hours prior to each overnight sleep study
17. Inability to refrain from alcohol consumption 24 hours prior to each overnight sleep study
18. Individuals with nicotine dependence (i.e., daily smokers)
19. Medical conditions that result in frequent need to get out of bed (e.g., sleep walking, nocturia)
20. Psychological or behavioural treatment for insomnia disorder, including cognitive behavioural therapy for insomnia, within 3 months before screening (excluding sleep hygiene advice)
21. Occupational or judicially ordered drug screening
22. Has held an unrestricted driving license <1 year
23. Cannot speak English fluently

## **Patient and Public Involvement**

Patients and/or the public were not involved in the design, conduct, reporting, nor dissemination plans of this research.

## **Intervention**

### Study doses

Participants receive a single fixed 2 mL oral liquid dose of: (1) 30 mg CBN ('ECS310' 1.5% containing 15 mg/mL CBN); (2) 300 mg CBN ('ECS310' 15% containing 150 mg/mL CBN); and (3) matched placebo. Treatments are administered across three separate overnight Treatment Sessions in randomised order two-hours prior to habitual lights out. The lower dose was selected to match the CBN products

1 available in the United States and supported by customer testimonies.[17] The higher dose was  
2 informed by a preclinical study of CBN isolate and sleep.[30]

### 3 4 Investigational product

5 The investigational drug ('ECS310') is a liquid formulation of CBN suspended in medium chain  
6 triglyceride (MCT) oil. The placebo contains MCT oil only. The maximum detectable THC content of  
7 the active investigational products is  $\leq 150 \mu\text{g}$ . Neither the study drug nor matched placebo contain any  
8 other cannabinoids or terpenes/terpenoids. The study drug and matched placebo are expected to be  
9 identical in their visual appearance, taste, and smell. The MCT oil contains paprika oleoresin colorant  
10 to ensure the double-blind is maintained and prevent oxidation. The Sponsor purchased the  
11 investigational product from BOD Australia (Sydney, Australia), who sourced investigational products  
12 from Medropharm (Zürich, Switzerland). Stability studies supporting the shelf life applied to the drug  
13 product were conducted in accordance with the International Conference on Harmonization (ICH)  
14 Guideline Q1A Stability Testing of new Drug Substances and Products and are ongoing. The CBN  
15 solution stability is 24 months at 15-25°C, 60% humidity, and away from sunlight.

### 16 17 Recruitment and retention

18 We aimed to recruit 20 participants over an 18-month period. The sample size was selected with  
19 consideration for practical factors such as time, cost, and resource allocation (rather than using formal  
20 statistical techniques) as it is pilot in nature. Participants are recruited from social media, the Woolcock  
21 Institute Volunteer Database, and locally displayed physical study advertisements. Participants are  
22 reimbursed a fixed amount equivalent to that used in previous clinical trials with similar participant  
23 involvement and loss of working hours.[42] To encourage retention, participants receive reimbursement  
24 upon completion of the final Treatment Session. Study advertisements include an embedded link and  
25 QR code to the study website (described below).

### 26 27 Eligibility screening

28 Eligibility assessment is performed in three steps undertaken by the study team at the Woolcock  
29 Institute of Medical Research (see Figure 1 *Study Flow Diagram*):

- 30 1. *On-line and telephone pre-screening.* Interested individuals are directed to the study webpage.  
31 They provide electronic consent before completing an online pre-screening questionnaire to  
32 assess initial eligibility (e.g., age, location, ISI score, transmeridian travel, shift work).  
33 Potentially suitable individuals can enter their contact details and are provided the Participant  
34 Information Statement so that the trial coordinator may conduct a brief telephone interview  
35 before scheduling screening appointments. Individuals deemed unsuitable are provided with  
36 support resources.
- 37 2. *Screening visit 1.* Willing and potentially suitable participants attend an on-site medical  
38 screening. The study physician obtains written informed consent before conducting a screening  
39 interview to compile medical history, assess suitability against study eligibility criteria (Box  
40 2), and diagnose insomnia disorder (ICSD-3[37] and DSM-V[38]). The following validated  
41 self-report questionnaires are used to evaluate eligibility: ISI,[43] a measure of insomnia  
42 disorder symptom severity over the past two-weeks; Epworth Sleepiness Scale (ESS),[44] a  
43 measure of sleep propensity in daily life; Hospital Anxiety and Depression Scale (HADS),[45]  
44 a measure of anxiety and depression; and, the Patient Health Questionnaire-9 (PHQ-9),[41] an  
45 instrument for screening and monitoring the severity of depression and suicidal ideation. An  
46 electrocardiogram (ECG) and urinary screen (pregnancy and recent alcohol, cannabis, cocaine,  
47 benzodiazepines, opiates, or amphetamines, use) are also conducted. Participants must agree to

- 1 the study protocol, including use of contraception and refraining from driving until the day after  
2 Treatment Session discharge.
- 3 3. *Screening visit 2.* Participants are required to complete a clinical overnight polysomnography  
4 to rule out the presence of other sleep disorders (obstructive sleep apnoea or sleep-related  
5 movement disorder, see Box 2). Diagnostic polysomnography results within the previous 12-  
6 months may be used where weight has not changed substantially in that time (at discretion of  
7 the study physician). Diagnostic sleep studies are scored by an experienced sleep technician[46]  
8 and reviewed by the study physician.

9  
10 Insert Figure 1 here

11  
12 **Figure 1.** *Study flow diagram*

13  
14 **Randomisation, allocation concealment, and blinding**

15 Participants are allocated to one of six possible treatment orders in a 1:1:1:1:1:1 ratio using a pre-  
16 populated randomisation schedule generated by the study epidemiologist (NSM). The six-orders  
17 constitute a balanced Latin square. Sequences were computer-generated and are stored in a password-  
18 protected system inaccessible to blinded study personnel (centralised computerised randomisation).  
19 Allocation concealment is managed by the unblinded study epidemiologist and an independent staff  
20 member who do not have any contact with participants, nor involvement in day-to-day trial activities.  
21 A study physician may request to be unblinded in the event of a medical emergency. Participants who  
22 are enrolled in the study, but not yet randomised, are assigned a unique screening number.  
23 Randomisation occurs at the outset of the first Treatment Session assuming participant eligibility  
24 persists. Working under the study physician, the trial coordinator records the decision to randomise the  
25 patient. The study database then issues an irrevocable randomisation number for that participant.  
26 Investigational product is stored in opaque sequentially numbered containers labelled with the patient  
27 randomisation and Treatment Session number to maintain blinding of all patients, staff, and outcome  
28 assessors. The drug manufacturer packaged and labelled the investigational product according to the  
29 randomisation list generated by the study epidemiologist.

30  
31 **Pre-Treatment Session procedures**

32 Participants are asked to maintain a regular sleep-wake schedule (i.e., lights out between 22-23:00 each  
33 evening) for one week prior to each Treatment Session. Participants wear a wrist-worn actigraphy  
34 monitor (GENEActive, Activinsights, United Kingdom) and complete a daily sleep diary (Karolinska  
35 Sleep Diary [KSS][47] modified to capture additional information, such as naps, alcohol/caffeine  
36 consumption, and GENEactiv removal times) throughout this period. If the sleep schedule is  
37 significantly irregular during the 7-night leadup (e.g., > 2 hours on > 2 nights), the principal medical  
38 and non-medical investigators may reschedule the visit. Participants are required to abstain from  
39 consuming cannabis, cannabinoids, and other CNS-active drugs throughout the entire study; and avoid  
40 alcohol and caffeine 24 hours prior to Treatment Sessions. Urinary drug, alcohol (DrugCheck NxStep  
41 OnSite, USA), and pregnancy (SureStep, Germany) screening occurs at the outset of each Treatment  
42 Session.

43  
44 **Treatment Session procedures**

45 Participants arrive at the Woolcock Sleep Clinic in the early evening (~17:00-18:00 depending on  
46 habitual lights out), where they remain until late morning (~10-11:00) the following day, as per the  
47 Treatment Session schedule in Figure 2. Standardised meals are provided. All Treatment Sessions are  
48 separated by a washout period of  $\geq 2$ -weeks to minimise carry-over effects between doses.[48]



1  
2  
3 1 Study drug administration

4 2 After a brief medical examination, the study physician prescribes and dispenses the study drug, drawing  
5 3 a fixed 2 mL volume of liquid into a pre-labelled amber plastic syringe. Participants self-administer the  
6 4 randomly allocated study drug 2-hours prior to lights out. The trial coordinator observes drug  
7 5 administration to ensure accuracy of dosing. The dose is documented in participant records and  
8 6 accountability logs. Timing of administration has been informed by delayed onset of effects observed  
9 7 with oral dosing of other cannabinoids[49] and delayed effects observed in a preclinical study of  
10 8 CBN.[30]  
11 9

12  
13  
14 10 **Data collection**

15 11 Study measures are described below (see Table 1).  
16  
17  
18  
19  
20  
21  
22  
23  
24  
25  
26  
27  
28  
29  
30  
31  
32  
33  
34  
35  
36  
37  
38  
39  
40  
41  
42  
43  
44  
45  
46  
47  
48  
49  
50  
51  
52  
53  
54  
55  
56  
57  
58  
59  
60

For peer review only



1 **Table 1.** A summary of assessments completed throughout the investigation.

| Measure (ordered first to last)                  | Screening | Treatment Session 1-3    |       |     |
|--------------------------------------------------|-----------|--------------------------|-------|-----|
|                                                  |           | At-home sleep monitoring | Night | Day |
| Informed consent                                 | ●         |                          |       |     |
| Medical examination                              | ●         |                          | ●     |     |
| Baseline questionnaires (ISI, ESS, HADS & PHQ-9) | ●         |                          |       |     |
| Electrocardiogram                                | ●         |                          |       |     |
| Urinary drug and alcohol screen                  | ●         |                          | ●     |     |
| Pregnancy test                                   | ●         |                          | ●     |     |
| Overnight polysomnography (clinical EEG)         | ●         |                          | ●     |     |
| Actigraphy                                       |           | ●                        |       |     |
| Sleep diary (KSD)                                |           | ●                        |       |     |
| Oral fluid drug screen (Securetech DrugWipe)     |           |                          | ●     | ●   |
| Quantisal saliva collection                      |           |                          | ●     | ●   |
| Blood plasma collection                          |           |                          | ●     | ●   |
| Urine collection                                 |           |                          | ●     | ●   |
| Mood (POMS)                                      |           |                          | ●     | ●   |
| Drug effects (DEQ)                               |           |                          | ●     | ●   |
| Balance (posturography)                          |           |                          | ●     | ●   |
| Memory (FTT & WPT)                               |           |                          | ●     | ●   |
| KDT with EEG                                     |           |                          | ●     | ●   |
| Sleep questionnaires (LSEQ, RCSQ, & KSS)         |           |                          |       | ●   |
| Simulated driving performance                    |           |                          |       | ●   |
| PVT                                              |           |                          |       | ●   |

2  
3  
4  
5  
6  
7  
8  
9  
10  
11  
12  
13  
14  
15  
16  
17  
18  
19  
20  
21  
22  
23  
24  
25  
26  
27  
28  
29  
30  
31  
32  
33  
34  
35  
36  
37  
38  
39  
40  
41  
42  
43  
44  
45  
46  
47  
48  
49  
50  
51  
52  
53  
54  
55  
56  
57  
58  
59  
60

Note. DEQ=Drug Effects Questionnaire; EEG=electroencephalography; ESS=Epworth Sleepiness Scale; FTT=Finger Tapping Task; HADS=Hospital Anxiety Depression Scale; ISI=Insomnia Severity Index; KSD=Karolinska Sleep Diary; KSS, Karolinska Sleepiness Scale; LSEQ= Leeds Sleep Evaluation Questionnaire; PHQ-9=Patient Health Questionnaire-9; POMS=Profile of Mood States; PSG=polysomnography; PVT=Psychomotor Vigilance Task; RCSQ=Richard Campbell Sleep Questionnaire; WPT=Word Pairs Task.

Insert Figure 2 here

**Figure 2.** Schedule of events during each Treatment Session.

Note. DEQ=Drug Effects Questionnaire; EEG=electroencephalography; FTT=Finger Tapping Task; ISI=Insomnia Severity Index; KSD=Karolinska Sleep Diary; KSS=Karolinska Sleepiness Scale; LSEQ= Leeds Sleep Evaluation Questionnaire; POMS=Profile of Mood States; POST=Posturography; PSG=polysomnography; PVT=Psychomotor Vigilance Task; RCSQ=Richard Campbell Sleep Questionnaire; UDS=Urinary Drug Screen; WPT=Word Pairs Task.

### Blood collection and plasma cannabinoid levels

Venous blood samples are taken at baseline (~17:00) and approximately 13-hours post administration (~08:45). Samples are drawn into EDTA vacutainers (Becton, Dickinson and Company, New Jersey, USA) and centrifuged (2500×g for 15 min at 4°C). Supernatant plasma is aliquoted into 1.5 mL Eppendorf Tubes and stored at -80°C in the Woolcock Institute of Medical Research until study completion when samples will be transferred to the Lambert Initiative Laboratory. Samples will undergo liquid chromatography–mass spectrometry (LC–MS/MS) analysis, using previously published methodology.[50-52] Plasma will be analysed for cannabinoids (e.g., CBN, THC, CBD), their metabolites (e.g., 11-OH-CBN, 11-COOH-CBN, 11-OH-THC, 11-COOH-THC, 7-OH-CBD, 7-COOH-CBD), and endocannabinoids and related molecules (e.g., 2-AG and anandamide). THC and CBD and their metabolites are being tested to verify abstinence from common cannabinoids, notwithstanding the trace quantities of THC that the investigational product may contain ( $\leq 150 \mu\text{g}/2\text{ml}$ ).

### Urine collection and urinary cannabinoid levels

Urine collection occurs at baseline (~17:00), and approximately 90-minutes (~21:30), 11-hours (~07:00), and 14-hours (~10:00) post drug administration. Urine (~6 mL) is aliquoted into 1.5 mL Eppendorf Tubes and stored at -80°C before being transferred to the Lambert Initiative Laboratory for quantification of cannabinoids (primarily THC, CBD and CBN) and their metabolites (11-OH-CBN, 11-COOH-CBN, 11-OH-THC, 11-COOH-THC, 7-OH-CBD, 7-COOH-CBD), and endocannabinoids at study completion. LC–MS/MS analyses will be conducted using our previously described methods .[50, 51] It is important to conduct urinary analyses to further characterise the pharmacokinetic profile of CBN, which is currently not well described.

### Salivary drug testing

Oral fluid testing occurs at baseline (~17:00), and at approximately 75-minutes (~21:15) and 13-hours (~08:55) post drug administration using the DrugWipe® 5S (DW5s; Securetec, Neubiberg, Germany) and Quantisal™ collection (Immunoanalysis, Pomona, CA) devices. The DW5s collects oral fluid (approximately 10–20  $\mu\text{L}$ ) from the tongue. The DW5s is commonly used in routine roadside drug tests; however, demonstrates variable sensitivity (22-89%), specificity (50-100%), and accuracy (53-94%).[53] While the investigational product contains negligible quantities of THC, similarities in chemical structure between CBN and THC may conceivably lead to false-positive test results that would be a concern should CBN become widely used by patients.[54] As such, the Quantisal™ device is used to collect oral fluid from participants (~1 mL) which will be used in LC–MS/MS quantification of cannabinoid (CBN and THC) and metabolite concentrations. Samples are placed in a stabilising buffer and stored at 4°C before being transferred to the Lambert Initiative analytical chemistry laboratory for analysis. Analyses occur within three-months of collection.

### Cognitive and psychomotor performance

Overnight declarative and procedural memory consolidation is assessed at each Treatment Session using the Word Pairs Task [WPT] and Finger Tapping Task [FTT], respectively. For both tasks, memory encoding during a learning phase occurs prior to drug administration (~19:15-20:00) with next-day retest (~09:00). As THC can acutely impair cognitive function and memory, it is necessary to examine CBN effects in this regard. Contrary to oral dosing studies, in one study, CBN reportedly caused a mild intoxication when administered intravenously at high doses (1.2mg/min)[27]. To investigate possible intoxication-induced bodily sway, postural balance ('posturography') is being measured using the stabilometric balance platform (Advanced Medical Technologies Inc., AccuSwayPLUS Balance platform, MA, USA), which measures centre of pressure in anterior-posterior

(y-axis) and medial-lateral (x-axis) directions using four strain gauge load cells at the bottom of the device. Centre of pressure is assessed in eyes open and eyes closed conditions. Postural balance assessment takes < 5 minutes to complete and is repeated 3 times (i.e., baseline, 60-minutes post drug administration, and next-day ~09:30 hours). The psychomotor vigilance test (PVT) is a commonly used reaction time based measure of attention and fatigue related changes in alertness[55] involving a hand-held box with a red-light emitting diode display of a three-digit millisecond counter (PVT-192, Ambulatory Monitoring Inc, Adley, NY, USA). During the 10-minute task, participants are instructed to respond as quickly as possible to stimuli appearing at variable intervals (ranging 2-10 seconds). The PVT is repeated twice during next-day testing (~09:00 and ~10:00 hours).

#### Self-report questionnaires

Mood is evaluated using the Profile of Mood States (POMS; 40-items with 5-point Likert scales)[56] questionnaire, a commonly used rating scale of transient and distinct moods. The Drug Effects Questionnaire (DEQ; 7-items with unipolar 100 mm visual analogue scales [VAS])[57] is used to evaluate subjective drug effect; including strength of drug effect, feeling stoned ('high'), liking/disliking the drug effect, feeling sedated, and feeling anxious. The POMS and DEQ are completed at baseline, ~1-hour post drug administration (~21:00), and the next-day (~09:30). The Leeds Sleep Evaluation Questionnaire (LSEQ; 10-items with 100 mm VAS)[58] is a validated measure of the previous night's sleep quality (sleep onset, maintenance, and quality; including behaviour following waking) in comparison to usual. The Richard Campbell Sleep Questionnaire (RCSQ; 5-item with 100 mm VAS)[59] is used to measure perceived sleep depth, sleep latency (time to fall asleep), number of awakenings, and sleep efficiency and quality. The LSEQ and RCSQ are administered upon wake (~06:15 hours).

#### Subjective and objective sleepiness

Karolinska Sleepiness Scale (KSS) and Karolinska Drowsiness Test (KDT) are used to measure subjective and objective sleepiness, respectively.[60] The KSS is a single-item rating scale assessing current sleepiness, ranging from 1 (*Extremely alert*) to 9 (*Extremely sleepy – fighting sleep*). KSS scores are typically compared to the objective drowsiness ascertained using the KDT. During the KDT, resting awake EEG is measured while participants focus on a wall marker, with eyes open and closed across 2-minute intervals. The KSS and KDT are administered immediately prior to sleep (~22:00 hours) and upon wake (~06:00 hours).

#### Polysomnography

Sleep is assessed using polysomnography (Grael polysomnography, Compumedics, USA), a multiparametric tool used for monitoring and diagnosing sleep disorders. Polysomnography consists of 18 channels recording biophysical changes that occur during sleep, including brain activity (via EEG); muscle activity or skeletal muscle activation (electromyography); eye movement (electrooculogram); cardiac function (ECG); respiratory effort using chest and abdominal belts; and digital pulse oximetry. To improve participant comfort/retention, the pulse oximeter, nasal cannula, and thermistor are only used during screening to detect sleep disordered breathing (Visit 2). Polysomnography equipment is fitted by an experienced sleep technician prior to sleep and is removed the next morning once the KDT has been completed. Sleep and associated events are scored according to AASM 2020 criteria in 30 second epochs.[46] Each patient's three polysomnograms are scored by the same sleep technician blinded to treatment allocation. For quantitative EEG analyses, sleep and KDT polysomnography recordings will be processed using a previously validated automated artefact detection program.[61, 62] Power spectral and spindle analyses will be derived from artefact-free epochs in central channels using previously published methodology.[61, 62]

### Simulated driving performance

Next-day driving performance is measured at ~08:00 using a fixed-based driving simulator (Hyperdrive, Adelaide, Australia) equipped with standard vehicle controls (described elsewhere[42, 48]) and using custom-built scenario developed using the SCANer Studio Simulation Engine (version 2022.2 r25, AVSimulation, Paris, France). The 30-minute driving scenario incorporates three independent epochs: (1) a ‘car following’ drive (~7 minutes duration) that closely resembles one that has previously demonstrated sensitivity to THC-induced impairment;[63] (2) a ‘highway’ drive (~17 minutes duration); and (3) a novel divided-attention drive (~6 minutes duration), designed to replicate a casual mobile-phone conversation that does not require mental rehearsal.[64] During the divided-attention task, pre-recorded five-word sentences are played every 10 seconds (through a hands-free speaker). Participants immediately indicate whether the sentence was sensical (e.g., “*the truck delivered the package*”) or non-sensical (e.g., “*the octopus burned the onions*”) in nature then; and at 7-seconds, they are asked to recall the last word in the sentence. The main outcome measure for all epochs of the driving task is SDLP, a widely used measure of lateral vehicular control that is sensitive to drug and alcohol effects. Previous reports show a dose-dependent increase in SDLP with THC (higher represents more erratic driving), particularly in occasional cannabis users.[63, 65] Secondary outcomes for each driving epoch include: (epoch 1) average and standard deviation of car-following headway (i.e., distance relative to car in front) and speed coherence (i.e., correlation between speed of lead and following car); (epochs 2 and 3) average speed, and standard deviation of speed (SDSP). The driving scenarios were programmed by investigator C.I.

### **Adverse events**

Safety outcome measures are described above. Blood pressure is measured four times during each Treatment Session (~17:00, 18:45, 21:00, and 09:30). Adverse event collection occurs via standardised interview at three timepoints (prior to discharge, and 7-hours and 7-days post discharge). Passive adverse event collection occurs throughout the study protocol via open-ended interview and is recorded on paper form. A study physician assesses the severity and causality of each adverse event.

### **Post-Treatment Session care**

Participants leave the research facility at approximately 10:00-11:00 and are contacted by the study coordinator that evening (~16:30), and 7-days later, to assess wellbeing and record adverse events (including changes to sleep). Upon study completion, if deemed necessary in the study physician’s opinion, a clinical follow-up is arranged for participants on an individual basis.

### **Data management**

Any information obtained for the purpose of this research that could identify participants is treated as confidential and securely stored adhering to guidelines of the Sponsor, HREC, NHMRC National Statement on Ethical Conduct in Human Research (2007) and Note for Guidance on Good Clinical Practice (CPMP/ICH-135/95). All onboarding, consent, and questionnaire data is captured through SPARDAC™ (Single Page Application - Research Data Capture) developed by Wappsystem Pty Ltd and hosted on Amazon Web Services in Sydney, NSW. Participant data is identified by unique codes. The code linking participant data to identity (e.g., name, date of birth, contact details) is stored securely with password protection, and is not accessible via the internet. Paper files are stored in locked storage cabinets on-site. Digital participant data are stored on a secure electronic data system, that is regularly backed up with disaster recovery features. All data will be stored securely for at least 15 years. Only study investigators have access to participant data. Data monitoring occurs on a regular basis by the study investigators. Data integrity is being enforced through a variety of mechanisms including data rules, range checks, and consistency checks against data already stored in the database. Written

1  
2  
3 1 documentation of changes are available through electronic logs and audit trails. Study safety is  
4 2 internally monitored and evaluated regularly, with adverse events documented and reported according  
5 3 to Sponsor and HREC requirements. The decision to terminate the study lies with the principal  
6 4 investigators and will be based on the recruitment target and safety data. The PIs and trial coordinator  
7 5 are monitoring data integrity throughout the trial.  
8  
9 6

### 7 **Trial management structure**

8 This is a pilot study and does not require an intricate management structure. The advisory committee  
9 provide advice or complete discrete tasks (Table 2). The management of day-to-day trial activities is  
10 overseen by the principal investigators and the trial coordinator (IL, CH, & BY). This trial does not  
11 have an independent data safety monitoring committee because it is a single-site single-night small  
12 sample study with a medication that is thought to have a low side-effect profile in a group of patients  
13 that are known not to be at high risk of life-threatening events.[66]  
14

### 15 **Roles and responsibilities**

16



1 *Table 2. Investigator roles and responsibilities*

| Investigator                           | Role                                                                   |
|----------------------------------------|------------------------------------------------------------------------|
| Dr Camilla Hoyos                       | Principal Non-Medical Investigator                                     |
| Professor Brendon Yee                  | Principal Medical Investigator                                         |
| Professor Iain McGregor                | Advisory committee member (Pharmacologist and Cannabinoid Expert)      |
| Professor Ronald Grunstein             | Advisory committee member (Sleep Physician)                            |
| Professor Bandana Saini                | Advisory committee (Study Pharmacist)                                  |
| Associate Professor Nathaniel Marshall | Advisory committee (Study Statistician/Epidemiologist)                 |
| Associate Professor Christopher Gordon | Advisory committee member (Registered Nurse and Sleep Disorder Expert) |
| Dr Angela D'Rozario                    | Advisory committee member (Sleep Neurobiology Expert/Consultant)       |
| Dr Danielle McCartney                  | Driving Simulator and Cannabinoid Expert                               |
| Dr Chris Irwin                         | Advisory committee member (Driving Simulation Expert)                  |
| Dr Anastasia Suraev                    | Advisory committee member (Cannabinoid and Sleep Expert)               |
| Ms Isobel Lavender                     | Clinical Trial Coordinator/PhD student                                 |

2  
3 The study investigators have led the design and conduct of this trial, will conduct the analyses, and  
4 make all publication decisions.

### 5 **Statistical analyses**

6 Statistical analyses will be completed using a commercial statistical package (e.g., SPSS, SAS, etc).  
7 Descriptive statistics will be described using means and standard deviations or counts and percentages  
8 as appropriate. Adverse events and serious adverse events will be tabulated with the total number of  
9 incidents by each timepoint. No formal hypothesis testing will be conducted on adverse event and  
10 serious adverse event data. Due to insufficient statistical power the KSS will only be described using a  
11 median and interquartile range. Continuous outcome data will be analysed using Linear Mixed Models  
12 due to expected inter-participant variability with repeated measures and ability to handle missing data.  
13 Where variables are collected pre-drug administration (i.e., treatment session 'baseline') for the  
14 outcome being analysed, those scores will also be included in the model as a covariate (e.g.,  
15 posturography, WPT, FTT, DEQ, POMS). Participants will be random factors. Fixed factors will be  
16 treatment (placebo, 30 mg CBN, and 300 mg CBN) and the arm (first, second, and third) of the study.  
17 Analysis will be by intention to treat. Difference in least squared means inside the treatment main effect  
18 will only be investigated for the hypotheses that the two active treatments are superior to placebo. We  
19 will not present a p-value comparison for the two active doses. The critical p-values for each of these  
20 hypotheses is set at 0.05 (two-tailed). Effect sizes will be calculated as partial eta squared ( $\eta_p^2$ ), Cohen's  
21 d, and Hedges' g, where appropriate. A Statistical Analysis Plan will be finalised before last patient last  
22 visit and will be publicly available (e.g., Clinical Trial Registry) and/or upon request.[67] We are not  
23 undertaking any interim or stratified analyses.

### 24 **Ethics and dissemination**



1  
2  
3 1 Ethics and dissemination: Human Research Ethics Committee approval has been granted by Bellberry  
4 2 Limited (2021-08-907). Study findings will be disseminated via scientific peer-reviewed publications,  
5 3 conferences, and media, as applicable.  
6 4

#### 5 **Access to data**

6 Information will be provided such that participants cannot be identified. Non-identifiable Individual  
7 Participant Data (IPD) will become available one year after study completion and will be available upon  
8 reasonable request to the principal investigators.  
9

#### 10 **Author contributions**

11 IL, DM, NSM, AS, CI, AD, CG, RRG, BY, ISM, and CMH were involved in methodological design  
12 and creation of the study protocol. BY and CMH are the principal investigators (medical and non-  
13 medical, respectively) who have overall responsibility for the design, conduct, and decision to submit  
14 for publication. NSM is the study epidemiologist and statistician who will design and publish the  
15 analysis plan in collaboration with IL. IL is the trial coordinator responsible for collecting trial data. IL  
16 drafted the manuscript. Investigator roles and responsibilities are outlined in Table 1. All authors have  
17 read and approved the final manuscript.  
18

#### 19 **Funding**

20 The study is being funded by the Lambert Initiative for Cannabinoid Therapeutics, within the Brain and  
21 Mind Centre at the University of Sydney, a philanthropically funded centre for cannabinoid research.  
22 Lambert Initiative for Cannabinoid Therapeutic activities extend from plant science and cannabinoid  
23 production, through cellular and preclinical pharmacology, to medicinal chemistry and drug discovery,  
24 including human laboratory studies and clinical trials. The decision to fund the study was overseen by  
25 a scientific committee known as the Internal Management Group comprising of members external to  
26 the Lambert Initiative, including the Pro-Vice Chancellor and the Faculty of Science Dean at the  
27 University of Sydney. The investigational product was purchased from Medropharm (Zürich,  
28 Switzerland) through BOD Australia (Sydney, Australia) who was not involved in the conception,  
29 design, nor conduct of the study. IL is supported by a Barry and Joy Lambert Postgraduate Research  
30 Scholarship. AS is supported by the Lambert Initiative for Cannabinoid Therapeutics, University of  
31 Sydney. CMH is funded by a National Heart Foundation Future Leader Fellowship. ALD (2008001)  
32 and RRG (1197439) are funded by National Health and Medical Research Council-Australian  
33 (NHMRC) Investigator Grants.  
34

#### 35 **Competing interest statement**

36 ISM is the Academic Director of the Lambert Initiative for Cannabinoid Therapeutics, Brain and Mind  
37 Centre, University of Sydney. ISM is a consultant for Kinosis Therapeutics, Psylo Ltd, and Emyria and  
38 is an inventor on several patents relating to novel cannabinoid and non-cannabinoid therapeutics  
39 unrelated to insomnia. He has received consulting fees from the Medicinal Cannabis Industry Australia  
40 (MCIA) and acts as an expert witness in legal cases involving cannabis-related issues. AS has received  
41 consulting fees from the Medicinal Cannabis Industry Australia (MCIA) and Haleon Australia. RRG  
42 has received discounted investigational products for an unrelated clinical trial from Neurim  
43 Pharmaceuticals Inc and received investigational product and matched placebo from Teva  
44 Pharmaceutical in unrelated clinical trials. He has received funding for lectures for Pfizer, Teva, Jazz  
45 and Eisai in the past 3 years. The other authors have no competing interests to disclose. The Woolcock  
46 Institute Sleep and Chronobiology Research Group has received research support from Avadel,  
47 Nyxoah, Idorsa, ResMed, BOD Australia, and Philips.  
48

1  
2  
3 **1 Patient consent for publication**

4 2 Not required.

5  
6  
7  
8  
9  
10  
11  
12  
13  
14  
15  
16  
17  
18  
19  
20  
21  
22  
23  
24  
25  
26  
27  
28  
29  
30  
31  
32  
33  
34  
35  
36  
37  
38  
39  
40  
41  
42  
43  
44  
45  
46  
47  
48  
49  
50  
51  
52  
53  
54  
55  
56  
57  
58  
59  
60

References

1. Medicine, A.A.o.S., *International Classification of Sleep Disorders*, ed. Darien. 2014, IL: American Academy of Sleep Medicine.
2. Appleton, S.L., et al., *Prevalence and comorbidity of sleep conditions in Australian adults: 2016 Sleep Health Foundation national survey*. *Sleep Health*, 2018. **4**(1): p. 13-19.
3. Morin, C.M., et al., *Incidence, Persistence, and Remission Rates of Insomnia Over 5 Years*. *JAMA Network Open*, 2020. **3**(11): p. e2018782-e2018782.
4. Riemann, D., et al., *Sleep, insomnia, and depression*. *Neuropsychopharmacology*, 2020. **45**(1): p. 74-89.
5. de Almondes, K.M., et al., *Insomnia and risk of dementia in older adults: Systematic review and meta-analysis*. *J Psychiatr Res*, 2016. **77**: p. 109-15.
6. Streatfeild, J., et al., *The social and economic cost of sleep disorders*. *Sleep*, 2021. **44**(11).
7. Grima, N.A., B. Bei, and D. Mansfield, *Insomnia management*. *Australian Journal for General Practitioners*, 2019. **48**(4): p. 198-202.
8. Koffel, E., A.D. Bramoweth, and C.S. Ulmer, *Increasing access to and utilization of cognitive behavioral therapy for insomnia (CBT-I): a narrative review*. *J Gen Intern Med*, 2018. **33**(6): p. 955-962.
9. Matthews, E.E., et al., *Adherence to cognitive behavioral therapy for insomnia: a systematic review*. *Sleep Med Rev*, 2013. **17**(6): p. 453-64.
10. Troxel, W.M., et al., *Predictors of treatment response to brief behavioral treatment of insomnia (BBTI) in older adults*. *J Clin Sleep Med*, 2013. **9**(12): p. 1281-9.
11. Crowe, S.F. and E.K. Stranks, *The Residual Medium and Long-term Cognitive Effects of Benzodiazepine Use: An Updated Meta-analysis*. *Arch Clin Neuropsychol*, 2018. **33**(7): p. 901-911.
12. Lu, H.C. and K. Mackie, *An Introduction to the Endogenous Cannabinoid System*. *Biol Psychiatry*, 2016. **79**(7): p. 516-25.
13. Lintzeris, N., et al., *Medical cannabis use in the Australian community following introduction of legal access: the 2018-2019 Online Cross-Sectional Cannabis as Medicine Survey (CAMS-18)*. *Harm Reduct J*, 2020. **17**(1): p. 37.
14. Corroon, J., *Cannabinol and Sleep: Separating Fact from Fiction*. *Cannabis Cannabinoid Res*, 2021. **6**(5): p. 366-371.
15. Hazekamp, A., et al., *Chemistry of Cannabis*, in *Comprehensive Natural Products II*. 2010, Science Direct: Leiden, The Netherlands. p. 1033-1084.
16. Hartley, M. *Leafly*. The 'sleepy' cannabinoid CBN might not actually be sedating 2019; Available from: <https://www.leafly.com/news/health/is-cbn-cannabinoid-sedating>.
17. *Full Spectrum CBN Oil (60mg/mL)*. 2022; Available from: <https://nuleafnaturals.com/product/full-spectrum-cbn-oil-60mg-ml/#:~:text=NuLeaf%20Naturals%20suggests%20a%20starting,Improved%20sleep%20and%20relaxation>.
18. Kesner, A.J. and D.M. Lovinger, *Cannabinoids, Endocannabinoids and Sleep*. *Front Mol Neurosci*, 2020. **13**: p. 125.
19. Murillo-Rodriguez, E., *The role of the CB1 receptor in the regulation of sleep*. *Prog Neuropsychopharmacol Biol Psychiatry*, 2008. **32**(6): p. 1420-7.

- 1 20. Sanford, A.E., E. Castillo, and R.L. Gannon, *Cannabinoids and hamster circadian*
- 2 *activity rhythms*. Brain Res, 2008. **1222**: p. 141-8.
- 3 21. Murillo-Rodriguez, E., et al., *Anandamide-induced sleep is blocked by SR141716A, a*
- 4 *CBI receptor antagonist and by U73122, a phospholipase C inhibitor*. Neuroreport,
- 5 2001. **12**(10): p. 2131-2136.
- 6 22. Murillo-Rodriguez, E., et al., *Anandamide modulates sleep and memory in rats*. Brain
- 7 Res, 1998. **812**(1-2): p. 270-4.
- 8 23. Steinberg, B.A. and C.P. Cannon, *Cannabinoid-1 receptor blockade in*
- 9 *cardiometabolic risk reduction: safety, tolerability, and therapeutic potential*. Am J
- 10 *Cardiol*, 2007. **100**(12A): p. 27P-32P.
- 11 24. Zou, S. and U. Kumar, *Cannabinoid Receptors and the Endocannabinoid System:*
- 12 *Signaling and Function in the Central Nervous System*. Int J Mol Sci, 2018. **19**(3).
- 13 25. Wallach, J., *Medicinal Cannabis: an overview for health-care providers*, in
- 14 *Remington*. 2021. p. 75-101.
- 15 26. Bird, K.D., et al., *Intercannabinoid and Cannabinoid-Ethanol Interactions and Their*
- 16 *Effects on Human-Performance*. Psychopharmacology, 1980. **71**(2): p. 181-188.
- 17 27. Perez-Reyes, M., et al., *A comparison of the pharmacological activity in man of*
- 18 *intravenously administered delta9-tetrahydrocannabinol, cannabiniol, and*
- 19 *cannabidiol*. Experientia, 1973. **29**(11): p. 1368-9.
- 20 28. Walsh, J.H., et al., *Treating insomnia symptoms with medicinal cannabis: a*
- 21 *randomized, crossover trial of the efficacy of a cannabinoid medicine compared with*
- 22 *placebo*. Sleep, 2021. **44**(11).
- 23 29. Gannon, W., et al., *Novel Formulation of THC and CBN in a Repeat-Action Tablet*
- 24 *Improves Objective and Subjective Measurements of Sleep* American Journal of
- 25 *Endocannabinoid Medicine*, 2021. **3**(1): p. 12-18.
- 26 30. Occelli Hanbury Brown, C., et al., *THE PHYTOCANNABINOID CANNABINOL*
- 27 *(CBN) ENHANCES SLEEP AND ALTERS SLEEP ARCHITECTURE IN RATS*, in
- 28 *32nd Annual Symposium on the Cannabinoids, International Cannabinoid Research*
- 29 *Society, Galway, Ireland*. 2022: Research Triangle Park, NC, USA. p. P2-1.
- 30 31. Berry, R.B., R. Brooks, and C.E. Gamaldo, *The AASM manual for the scoring of sleep*
- 31 *and associated events: rules, terminology and technical specifications, version 2.6. 0*.
- 32 *American Academy of Sleep Medicine, Darien, Illinois; 2020*. Most recent scoring
- 33 *manual from the American Academy of Sleep Medicine (AASM), 2020*.
- 34 32. *Standard for the Uniform Scheduling of Medicines and Poisons*. 2022, Therapeutic
- 35 *Goods Administration: Woden, Australia*.
- 36 33. Gong, H., Jr., et al., *Acute and subacute bronchial effects of oral cannabinoids*. Clin
- 37 *Pharmacol Ther*, 1984. **35**(1): p. 26-32.
- 38 34. Karniol, I.G., et al., *Effects of delta9-tetrahydrocannabinol and cannabiniol in man*.
- 39 *Pharmacology*, 1975. **13**(6): p. 502-12.
- 40 35. Hollister, L., *Cannabidiol and Cannabiniol in Man*, Specialia, Editor. 1973,
- 41 *Experientia*.
- 42 36. Chan, A.W., et al., *SPIRIT 2013 statement: defining standard protocol items for*
- 43 *clinical trials*. Ann Intern Med, 2013. **158**(3): p. 200-7.
- 44 37. *International Classification of Sleep Disorders*. 3 ed, ed. A.A.o.S. Medicine. 2014,
- 45 *Darien, IL: American Academy of Sleep Medicine*.
- 46 38. *Diagnostic and statistical manual of mental disorders : DSM-5*, in *American*
- 47 *Psychiatric Association. Diagnostic and statistical manual of mental disorders, Fifth*
- 48 *edition*. 2013, American Psychiatric Publishing: Arlington, VA.
- 49 39. Edwards, B.A., et al., *Aging and sleep: physiology and pathophysiology*. Semin
- 50 *Respir Crit Care Med*, 2010. **31**(5): p. 618-33.

- 1 40. Whiting, P.F., et al., *Cannabinoids for Medical Use: A Systematic Review and Meta-analysis*. JAMA, 2015. **313**(24): p. 2456-73.
- 2
- 3 41. Spitzer, R.L., K. Kroenke, and J.B. Williams, *Validation and utility of a self-report version of PRIME-MD: the PHQ primary care study. Primary Care Evaluation of Mental Disorders. Patient Health Questionnaire*. Jama, 1999. **282**(18): p. 1737-44.
- 4
- 5 42. Suraev, A., et al., *Cannabidiol (CBD) and Delta(9)-tetrahydrocannabinol (THC) for chronic insomnia disorder ('CANSLEEP' trial): protocol for a randomised, placebo-controlled, double-blinded, proof-of-concept trial*. BMJ Open, 2020. **10**(5): p. e034421.
- 6
- 7 43. Bastien, C.H., A. Vallières, and C.M. Morin, *Validation of the Insomnia Severity Index as an outcome measure for insomnia research*. Sleep Med, 2001. **2**(4): p. 297-307.
- 8
- 9 44. Johns, M.W., *A new method for measuring daytime sleepiness: the Epworth sleepiness scale*. Sleep, 1991. **14**(6): p. 540-5.
- 10
- 11 45. Zigmond, A.S. and R.P. Snaith, *The hospital anxiety and depression scale*. Acta Psychiatr Scand, 1983. **67**(6): p. 361-70.
- 12
- 13 46. Berry, R.B., et al., *AASM Scoring Manual Version 2.2 Updates: New Chapters for Scoring Infant Sleep Staging and Home Sleep Apnea Testing*. J Clin Sleep Med, 2015. **11**(11): p. 1253-4.
- 14
- 15 47. Akerstedt, T., et al., *The subjective meaning of good sleep, an intraindividual approach using the Karolinska Sleep Diary*. Percept Mot Skills, 1994. **79**(1 Pt 1): p. 287-96.
- 16
- 17 48. McCartney, D., et al., *Effects of cannabidiol on simulated driving and cognitive performance: A dose-ranging randomised controlled trial*. Journal of Psychopharmacology, 2022: p. 02698811221095356.
- 18
- 19 49. Huestis, M.A., *Human cannabinoid pharmacokinetics*. Chem Biodivers, 2007. **4**(8): p. 1770-804.
- 20
- 21 50. Kevin, R.C., et al., *Urinary cannabinoid levels during nabiximols (Sativex®)-medicated inpatient cannabis withdrawal*. Forensic Toxicology, 2017. **35**(1): p. 33-44.
- 22
- 23 51. Sahinovic, A., et al., *Effects of Cannabidiol on Exercise Physiology and Bioenergetics: A Randomised Controlled Pilot Trial*. Sports Med Open, 2022. **8**(1): p. 27.
- 24
- 25 52. Kevin, R.C., et al., *A validated method for the simultaneous quantification of cannabidiol,  $\Delta(9)$ -tetrahydrocannabinol, and their metabolites in human plasma and application to plasma samples from an oral cannabidiol open-label trial*. Drug Test Anal, 2021. **13**(3): p. 614-627.
- 26
- 27 53. McCartney, D., et al., *Orally administered cannabidiol does not produce false-positive tests for  $\Delta(9)$ -tetrahydrocannabinol on the Securetec DrugWipe® 5S or Dräger DrugTest® 5000*. Drug Testing and Analysis, 2022. **14**(1): p. 137-143.
- 28
- 29 54. McCartney, D., et al., *Orally administered cannabidiol does not produce false-positive tests for  $\Delta(9)$ -tetrahydrocannabinol on the Securetec DrugWipe® 5S or Dräger DrugTest® 5000*. Drug Test Anal, 2022. **14**(1): p. 137-143.
- 30
- 31 55. Basner, M., D. Mollicone, and D.F. Dinges, *Validity and Sensitivity of a Brief Psychomotor Vigilance Test (PVT-B) to Total and Partial Sleep Deprivation*. Acta Astronaut, 2011. **69**(11-12): p. 949-959.
- 32
- 33 56. Gibson, S.J., *The measurement of mood states in older adults*. J Gerontol B Psychol Sci Soc Sci, 1997. **52**(4): p. P167-74.
- 34
- 35 57. Morean, M.E., et al., *The drug effects questionnaire: psychometric support across three drug types*. Psychopharmacology (Berl), 2013. **227**(1): p. 177-92.
- 36
- 37
- 38
- 39
- 40
- 41
- 42
- 43
- 44
- 45
- 46
- 47
- 48
- 49
- 50
- 51
- 52
- 53
- 54
- 55
- 56
- 57
- 58
- 59
- 60



- 1  
2  
3 1 58. Shahid, A., et al., *Leeds Sleep Evaluation Questionnaire (LSEQ)*. 2011, Springer New  
4 2 York: New York, NY. p. 211-213.  
5 3 59. Turci, A.M., et al., *The Brazilian Portuguese version of the revised Maastricht Upper*  
6 4 *Extremity Questionnaire (MUEQ-Br revised): translation, cross-cultural adaptation,*  
7 5 *reliability, and structural validation*. BMC Musculoskelet Disord, 2015. **16**: p. 41.  
8 6 60. Putilov, A.A. and O.G. Donskaya, *Construction and validation of the EEG analogues*  
9 7 *of the Karolinska sleepiness scale based on the Karolinska drowsiness test*. Clinical  
10 8 neurophysiology, 2013. **124**(7): p. 1346-1352.  
11 9 61. D'Rozario, A.L., et al., *An automated algorithm to identify and reject artefacts for*  
12 10 *quantitative EEG analysis during sleep in patients with sleep-disordered breathing*.  
13 11 Sleep Breath, 2015. **19**(2): p. 607-15.  
14 12 62. D'Rozario, A.L., et al., *Improvements in cognitive function and quantitative sleep*  
15 13 *electroencephalogram in obstructive sleep apnea after six months of continuous*  
16 14 *positive airway pressure treatment*. Sleep, 2022. **45**(6).  
17 15 63. Arkell, T.R., et al., *Cannabidiol (CBD) content in vaporized cannabis does not*  
18 16 *prevent tetrahydrocannabinol (THC)-induced impairment of driving and cognition*.  
19 17 Psychopharmacology (Berl), 2019. **236**(9): p. 2713-2724.  
20 18 64. Ogata, N.G., et al., *Mobile Telephone Use and Reaction Time in Drivers With*  
21 19 *Glaucoma*. JAMA Netw Open, 2019. **2**(4): p. e192169.  
22 20 65. McCartney, D., et al., *Determining the magnitude and duration of acute Delta(9)-*  
23 21 *tetrahydrocannabinol (Delta(9)-THC)-induced driving and cognitive impairment: A*  
24 22 *systematic and meta-analytic review*. Neurosci Biobehav Rev, 2021. **126**: p. 175-193.  
25 23 66. Ellenberg, S.S., T.R. Fleming, and D.L. DeMets, *Data monitoring in clinical trials : a*  
26 24 *practical perspective*. Second edition. ed. Statistics in practice. 2019, Hoboken, NJ:  
27 25 Wiley.  
28 26 67. Gamble, C., et al., *Guidelines for the Content of Statistical Analysis Plans in Clinical*  
29 27 *Trials*. JAMA, 2017. **318**(23): p. 2337-2343.  
30 28  
31  
32  
33  
34  
35  
36  
37  
38  
39  
40  
41  
42  
43  
44  
45  
46  
47  
48  
49  
50  
51  
52  
53  
54  
55  
56  
57  
58  
59  
60

1  
2  
3  
4  
5  
6  
7  
8  
9  
10  
11  
12  
13  
14  
15  
16  
17  
18  
19  
20  
21  
22  
23  
24  
25  
26  
27  
28  
29  
30  
31  
32  
33  
34  
35  
36  
37  
38  
39  
40  
41  
42  
43  
44  
45  
46  
47  
48  
49  
50  
51  
52  
53  
54  
55  
56  
57  
58  
59  
60







For peer review only - <http://bmjopen.bmj.com/site/about/guidelines.xhtml>



SPIRIT 2013 Checklist: Recommended items to address in a clinical trial protocol and related documents\*

| Section/item                      | Item No | Description                                                                                                                                                                                                                                                                              | Addressed on page number     |
|-----------------------------------|---------|------------------------------------------------------------------------------------------------------------------------------------------------------------------------------------------------------------------------------------------------------------------------------------------|------------------------------|
| <b>Administrative information</b> |         |                                                                                                                                                                                                                                                                                          |                              |
| Title                             | 1       | Descriptive title identifying the study design, population, interventions, and, if applicable, trial acronym                                                                                                                                                                             | 1 _____                      |
| Trial registration                | 2a      | Trial identifier and registry name. If not yet registered, name of intended registry                                                                                                                                                                                                     | 1,2,5,7                      |
|                                   | 2b      | All items from the World Health Organization Trial Registration Data Set                                                                                                                                                                                                                 | In trial registration        |
| Protocol version                  | 3       | Date and version identifier                                                                                                                                                                                                                                                              | 7                            |
| Funding                           | 4       | Sources and types of financial, material, and other support                                                                                                                                                                                                                              | 1,2,6,18                     |
| Roles and responsibilities        | 5a      | Names, affiliations, and roles of protocol contributors                                                                                                                                                                                                                                  | 1,6,16-18                    |
|                                   | 5b      | Name and contact information for the trial sponsor                                                                                                                                                                                                                                       | 1, 6, and trial registration |
|                                   | 5c      | Role of study sponsor and funders, if any, in study design; collection, management, analysis, and interpretation of data; writing of the report; and the decision to submit the report for publication, including whether they will have ultimate authority over any of these activities | 6-7,18                       |

|    |                                                           |     |                                                                                                                                                                                                                                                                  |             |
|----|-----------------------------------------------------------|-----|------------------------------------------------------------------------------------------------------------------------------------------------------------------------------------------------------------------------------------------------------------------|-------------|
| 1  |                                                           | 5d  | Composition, roles, and responsibilities of the coordinating centre, steering committee, endpoint adjudication committee, data management team, and other individuals or groups overseeing the trial, if applicable (see Item 21a for data monitoring committee) | 16-18       |
| 2  |                                                           |     |                                                                                                                                                                                                                                                                  |             |
| 3  |                                                           |     |                                                                                                                                                                                                                                                                  |             |
| 4  |                                                           |     |                                                                                                                                                                                                                                                                  |             |
| 5  |                                                           |     |                                                                                                                                                                                                                                                                  |             |
| 6  |                                                           |     |                                                                                                                                                                                                                                                                  |             |
| 7  |                                                           |     |                                                                                                                                                                                                                                                                  |             |
| 8  |                                                           |     |                                                                                                                                                                                                                                                                  |             |
| 9  |                                                           |     |                                                                                                                                                                                                                                                                  |             |
| 10 | <b>Introduction</b>                                       |     |                                                                                                                                                                                                                                                                  |             |
| 11 |                                                           |     |                                                                                                                                                                                                                                                                  |             |
| 12 | Background and rationale                                  | 6a  | Description of research question and justification for undertaking the trial, including summary of relevant studies (published and unpublished) examining benefits and harms for each intervention                                                               | 3-4         |
| 13 |                                                           |     |                                                                                                                                                                                                                                                                  |             |
| 14 |                                                           |     |                                                                                                                                                                                                                                                                  |             |
| 15 |                                                           | 6b  | Explanation for choice of comparators                                                                                                                                                                                                                            | 4           |
| 16 |                                                           |     |                                                                                                                                                                                                                                                                  |             |
| 17 | Objectives                                                | 7   | Specific objectives or hypotheses                                                                                                                                                                                                                                | 4           |
| 18 |                                                           |     |                                                                                                                                                                                                                                                                  |             |
| 19 | Trial design                                              | 8   | Description of trial design including type of trial (eg, parallel group, crossover, factorial, single group), allocation ratio, and framework (eg, superiority, equivalence, noninferiority, exploratory)                                                        | 4           |
| 20 |                                                           |     |                                                                                                                                                                                                                                                                  |             |
| 21 |                                                           |     |                                                                                                                                                                                                                                                                  |             |
| 22 |                                                           |     |                                                                                                                                                                                                                                                                  |             |
| 23 | <b>Methods: Participants, interventions, and outcomes</b> |     |                                                                                                                                                                                                                                                                  |             |
| 24 |                                                           |     |                                                                                                                                                                                                                                                                  |             |
| 25 | Study setting                                             | 9   | Description of study settings (eg, community clinic, academic hospital) and list of countries where data will be collected. Reference to where list of study sites can be obtained                                                                               | 6-7         |
| 26 |                                                           |     |                                                                                                                                                                                                                                                                  |             |
| 27 |                                                           |     |                                                                                                                                                                                                                                                                  |             |
| 28 | Eligibility criteria                                      | 10  | Inclusion and exclusion criteria for participants. If applicable, eligibility criteria for study centres and individuals who will perform the interventions (eg, surgeons, psychotherapists)                                                                     | 7-9 (Box 2) |
| 29 |                                                           |     |                                                                                                                                                                                                                                                                  |             |
| 30 |                                                           |     |                                                                                                                                                                                                                                                                  |             |
| 31 | Interventions                                             | 11a | Interventions for each group with sufficient detail to allow replication, including how and when they will be administered                                                                                                                                       | 9           |
| 32 |                                                           |     |                                                                                                                                                                                                                                                                  |             |
| 33 |                                                           |     |                                                                                                                                                                                                                                                                  |             |
| 34 |                                                           | 11b | Criteria for discontinuing or modifying allocated interventions for a given trial participant (eg, drug dose change in response to harms, participant request, or improving/worsening disease)                                                                   | 7-9 (Box 2) |
| 35 |                                                           |     |                                                                                                                                                                                                                                                                  |             |
| 36 |                                                           |     |                                                                                                                                                                                                                                                                  |             |
| 37 |                                                           | 11c | Strategies to improve adherence to intervention protocols, and any procedures for monitoring adherence (eg, drug tablet return, laboratory tests)                                                                                                                | 9, 14       |
| 38 |                                                           |     |                                                                                                                                                                                                                                                                  |             |
| 39 |                                                           |     |                                                                                                                                                                                                                                                                  |             |
| 40 |                                                           |     |                                                                                                                                                                                                                                                                  |             |
| 41 |                                                           | 11d | Relevant concomitant care and interventions that are permitted or prohibited during the trial                                                                                                                                                                    | 7-9 (Box 2) |
| 42 |                                                           |     |                                                                                                                                                                                                                                                                  |             |

|    |                      |    |                                                                                                                                                                                                                                                                                                                                                                                |                             |
|----|----------------------|----|--------------------------------------------------------------------------------------------------------------------------------------------------------------------------------------------------------------------------------------------------------------------------------------------------------------------------------------------------------------------------------|-----------------------------|
| 1  | Outcomes             | 12 | Primary, secondary, and other outcomes, including the specific measurement variable (eg, systolic blood pressure), analysis metric (eg, change from baseline, final value, time to event), method of aggregation (eg, median, proportion), and time point for each outcome. Explanation of the clinical relevance of chosen efficacy and harm outcomes is strongly recommended | 4-6 (Box 1), trial registry |
| 2  |                      |    |                                                                                                                                                                                                                                                                                                                                                                                |                             |
| 3  |                      |    |                                                                                                                                                                                                                                                                                                                                                                                |                             |
| 4  |                      |    |                                                                                                                                                                                                                                                                                                                                                                                |                             |
| 5  |                      |    |                                                                                                                                                                                                                                                                                                                                                                                |                             |
| 6  | Participant timeline | 13 | Time schedule of enrolment, interventions (including any run-ins and washouts), assessments, and visits for participants. A schematic diagram is highly recommended (see Figure)                                                                                                                                                                                               | Table 1; Figures 1-2        |
| 7  |                      |    |                                                                                                                                                                                                                                                                                                                                                                                |                             |
| 8  |                      |    |                                                                                                                                                                                                                                                                                                                                                                                |                             |
| 9  | Sample size          | 14 | Estimated number of participants needed to achieve study objectives and how it was determined, including clinical and statistical assumptions supporting any sample size calculations                                                                                                                                                                                          | 9                           |
| 10 |                      |    |                                                                                                                                                                                                                                                                                                                                                                                |                             |
| 11 |                      |    |                                                                                                                                                                                                                                                                                                                                                                                |                             |
| 12 |                      |    |                                                                                                                                                                                                                                                                                                                                                                                |                             |
| 13 | Recruitment          | 15 | Strategies for achieving adequate participant enrolment to reach target sample size                                                                                                                                                                                                                                                                                            | 9                           |
| 14 |                      |    |                                                                                                                                                                                                                                                                                                                                                                                |                             |
| 15 |                      |    |                                                                                                                                                                                                                                                                                                                                                                                |                             |

### Methods: Assignment of interventions (for controlled trials)

#### Allocation:

|    |                                  |     |                                                                                                                                                                                                                                                                                                                                                          |              |
|----|----------------------------------|-----|----------------------------------------------------------------------------------------------------------------------------------------------------------------------------------------------------------------------------------------------------------------------------------------------------------------------------------------------------------|--------------|
| 19 | Sequence generation              | 16a | Method of generating the allocation sequence (eg, computer-generated random numbers), and list of any factors for stratification. To reduce predictability of a random sequence, details of any planned restriction (eg, blocking) should be provided in a separate document that is unavailable to those who enrol participants or assign interventions | 10-11        |
| 20 |                                  |     |                                                                                                                                                                                                                                                                                                                                                          |              |
| 21 |                                  |     |                                                                                                                                                                                                                                                                                                                                                          |              |
| 22 |                                  |     |                                                                                                                                                                                                                                                                                                                                                          |              |
| 23 |                                  |     |                                                                                                                                                                                                                                                                                                                                                          |              |
| 24 |                                  |     |                                                                                                                                                                                                                                                                                                                                                          |              |
| 25 | Allocation concealment mechanism | 16b | Mechanism of implementing the allocation sequence (eg, central telephone; sequentially numbered, opaque, sealed envelopes), describing any steps to conceal the sequence until interventions are assigned                                                                                                                                                | 10-11        |
| 26 |                                  |     |                                                                                                                                                                                                                                                                                                                                                          |              |
| 27 |                                  |     |                                                                                                                                                                                                                                                                                                                                                          |              |
| 28 |                                  |     |                                                                                                                                                                                                                                                                                                                                                          |              |
| 29 | Implementation                   | 16c | Who will generate the allocation sequence, who will enrol participants, and who will assign participants to interventions                                                                                                                                                                                                                                | 10-11        |
| 30 |                                  |     |                                                                                                                                                                                                                                                                                                                                                          |              |
| 31 |                                  |     |                                                                                                                                                                                                                                                                                                                                                          |              |
| 32 |                                  |     |                                                                                                                                                                                                                                                                                                                                                          |              |
| 33 | Blinding (masking)               | 17a | Who will be blinded after assignment to interventions (eg, trial participants, care providers, outcome assessors, data analysts), and how                                                                                                                                                                                                                | 10-11, 17-18 |
| 34 |                                  |     |                                                                                                                                                                                                                                                                                                                                                          |              |
| 35 |                                  |     |                                                                                                                                                                                                                                                                                                                                                          |              |
| 36 |                                  | 17b | If blinded, circumstances under which unblinding is permissible, and procedure for revealing a participant's allocated intervention during the trial                                                                                                                                                                                                     | 10           |
| 37 |                                  |     |                                                                                                                                                                                                                                                                                                                                                          |              |
| 38 |                                  |     |                                                                                                                                                                                                                                                                                                                                                          |              |
| 39 |                                  |     |                                                                                                                                                                                                                                                                                                                                                          |              |

### Methods: Data collection, management, and analysis

|    |                            |     |                                                                                                               |        |
|----|----------------------------|-----|---------------------------------------------------------------------------------------------------------------|--------|
| 1  | Data collection            | 18a | Plans for assessment and collection of outcome, baseline, and other trial data, including any related         | 10-16  |
| 2  | methods                    |     | processes to promote data quality (eg, duplicate measurements, training of assessors) and a description of    |        |
| 3  |                            |     | study instruments (eg, questionnaires, laboratory tests) along with their reliability and validity, if known. |        |
| 4  |                            |     | Reference to where data collection forms can be found, if not in the protocol                                 |        |
| 5  |                            |     |                                                                                                               |        |
| 6  |                            | 18b | Plans to promote participant retention and complete follow-up, including list of any outcome data to be       | 10, 15 |
| 7  |                            |     | collected for participants who discontinue or deviate from intervention protocols                             |        |
| 8  |                            |     |                                                                                                               |        |
| 9  | Data management            | 19  | Plans for data entry, coding, security, and storage, including any related processes to promote data quality  | 16-17  |
| 10 |                            |     | (eg, double data entry; range checks for data values). Reference to where details of data management          |        |
| 11 |                            |     | procedures can be found, if not in the protocol                                                               |        |
| 12 |                            |     |                                                                                                               |        |
| 13 |                            |     |                                                                                                               |        |
| 14 | Statistical methods        | 20a | Statistical methods for analysing primary and secondary outcomes. Reference to where other details of the     | 18     |
| 15 |                            |     | statistical analysis plan can be found, if not in the protocol                                                |        |
| 16 |                            |     |                                                                                                               |        |
| 17 |                            | 20b | Methods for any additional analyses (eg, subgroup and adjusted analyses)                                      | 18     |
| 18 |                            |     |                                                                                                               |        |
| 19 |                            | 20c | Definition of analysis population relating to protocol non-adherence (eg, as randomised analysis), and any    | 18     |
| 20 |                            |     | statistical methods to handle missing data (eg, multiple imputation)                                          |        |
| 21 |                            |     |                                                                                                               |        |
| 22 |                            |     |                                                                                                               |        |
| 23 | <b>Methods: Monitoring</b> |     |                                                                                                               |        |
| 24 |                            |     |                                                                                                               |        |
| 25 | Data monitoring            | 21a | Composition of data monitoring committee (DMC); summary of its role and reporting structure; statement of     | 15-18  |
| 26 |                            |     | whether it is independent from the sponsor and competing interests; and reference to where further details    |        |
| 27 |                            |     | about its charter can be found, if not in the protocol. Alternatively, an explanation of why a DMC is not     |        |
| 28 |                            |     | needed                                                                                                        |        |
| 29 |                            |     |                                                                                                               |        |
| 30 |                            | 21b | Description of any interim analyses and stopping guidelines, including who will have access to these          | 17     |
| 31 |                            |     | interim results and make the final decision to terminate the trial                                            |        |
| 32 |                            |     |                                                                                                               |        |
| 33 |                            |     |                                                                                                               |        |
| 34 | Harms                      | 22  | Plans for collecting, assessing, reporting, and managing solicited and spontaneously reported adverse         | 15     |
| 35 |                            |     | events and other unintended effects of trial interventions or trial conduct                                   |        |
| 36 |                            |     |                                                                                                               |        |
| 37 | Auditing                   | 23  | Frequency and procedures for auditing trial conduct, if any, and whether the process will be independent      | 16     |
| 38 |                            |     | from investigators and the sponsor                                                                            |        |
| 39 |                            |     |                                                                                                               |        |
| 40 |                            |     |                                                                                                               |        |

41 **Ethics and dissemination**

|    |                               |     |                                                                                                                                                                                                                                                                                     |                        |
|----|-------------------------------|-----|-------------------------------------------------------------------------------------------------------------------------------------------------------------------------------------------------------------------------------------------------------------------------------------|------------------------|
| 1  | Research ethics approval      | 24  | Plans for seeking research ethics committee/institutional review board (REC/IRB) approval                                                                                                                                                                                           | 1, 2, 7, 17            |
| 2  |                               |     |                                                                                                                                                                                                                                                                                     |                        |
| 3  |                               |     |                                                                                                                                                                                                                                                                                     |                        |
| 4  | Protocol amendments           | 25  | Plans for communicating important protocol modifications (eg, changes to eligibility criteria, outcomes, analyses) to relevant parties (eg, investigators, REC/IRBs, trial participants, trial registries, journals, regulators)                                                    | 7                      |
| 5  |                               |     |                                                                                                                                                                                                                                                                                     |                        |
| 6  |                               |     |                                                                                                                                                                                                                                                                                     |                        |
| 7  |                               |     |                                                                                                                                                                                                                                                                                     |                        |
| 8  | Consent or assent             | 26a | Who will obtain informed consent or assent from potential trial participants or authorised surrogates, and how (see Item 32)                                                                                                                                                        | 9-10                   |
| 9  |                               |     |                                                                                                                                                                                                                                                                                     |                        |
| 10 |                               |     |                                                                                                                                                                                                                                                                                     |                        |
| 11 |                               |     |                                                                                                                                                                                                                                                                                     |                        |
| 12 |                               | 26b | Additional consent provisions for collection and use of participant data and biological specimens in ancillary studies, if applicable                                                                                                                                               | N/A                    |
| 13 |                               |     |                                                                                                                                                                                                                                                                                     |                        |
| 14 |                               |     |                                                                                                                                                                                                                                                                                     |                        |
| 15 | Confidentiality               | 27  | How personal information about potential and enrolled participants will be collected, shared, and maintained in order to protect confidentiality before, during, and after the trial                                                                                                | 15-16                  |
| 16 |                               |     |                                                                                                                                                                                                                                                                                     |                        |
| 17 |                               |     |                                                                                                                                                                                                                                                                                     |                        |
| 18 | Declaration of interests      | 28  | Financial and other competing interests for principal investigators for the overall trial and each study site                                                                                                                                                                       | 18                     |
| 19 |                               |     |                                                                                                                                                                                                                                                                                     |                        |
| 20 |                               |     |                                                                                                                                                                                                                                                                                     |                        |
| 21 | Access to data                | 29  | Statement of who will have access to the final trial dataset, and disclosure of contractual agreements that limit such access for investigators                                                                                                                                     | 1, 10, 16-18           |
| 22 |                               |     |                                                                                                                                                                                                                                                                                     |                        |
| 23 |                               |     |                                                                                                                                                                                                                                                                                     |                        |
| 24 | Ancillary and post-trial care | 30  | Provisions, if any, for ancillary and post-trial care, and for compensation to those who suffer harm from trial participation                                                                                                                                                       | 13                     |
| 25 |                               |     |                                                                                                                                                                                                                                                                                     |                        |
| 26 |                               |     |                                                                                                                                                                                                                                                                                     |                        |
| 27 |                               |     |                                                                                                                                                                                                                                                                                     |                        |
| 28 | Dissemination policy          | 31a | Plans for investigators and sponsor to communicate trial results to participants, healthcare professionals, the public, and other relevant groups (eg, via publication, reporting in results databases, or other data sharing arrangements), including any publication restrictions | 1, 2, 17               |
| 29 |                               |     |                                                                                                                                                                                                                                                                                     |                        |
| 30 |                               |     |                                                                                                                                                                                                                                                                                     |                        |
| 31 |                               |     |                                                                                                                                                                                                                                                                                     |                        |
| 32 |                               | 31b | Authorship eligibility guidelines and any intended use of professional writers                                                                                                                                                                                                      | 17                     |
| 33 |                               |     |                                                                                                                                                                                                                                                                                     |                        |
| 34 |                               | 31c | Plans, if any, for granting public access to the full protocol, participant-level dataset, and statistical code                                                                                                                                                                     | 18; trial registry     |
| 35 |                               |     |                                                                                                                                                                                                                                                                                     |                        |
| 36 |                               |     |                                                                                                                                                                                                                                                                                     |                        |
| 37 | <b>Appendices</b>             |     |                                                                                                                                                                                                                                                                                     |                        |
| 38 |                               |     |                                                                                                                                                                                                                                                                                     |                        |
| 39 | Informed consent materials    | 32  | Model consent form and other related documentation given to participants and authorised surrogates                                                                                                                                                                                  | Supplementary material |
| 40 |                               |     |                                                                                                                                                                                                                                                                                     |                        |
| 41 |                               |     |                                                                                                                                                                                                                                                                                     |                        |
| 42 |                               |     |                                                                                                                                                                                                                                                                                     |                        |
| 43 |                               |     |                                                                                                                                                                                                                                                                                     |                        |
| 44 |                               |     |                                                                                                                                                                                                                                                                                     |                        |
| 45 |                               |     |                                                                                                                                                                                                                                                                                     |                        |
| 46 |                               |     |                                                                                                                                                                                                                                                                                     |                        |



|   |            |    |                                                                                                           |    |
|---|------------|----|-----------------------------------------------------------------------------------------------------------|----|
| 1 | Biological | 33 | Plans for collection, laboratory evaluation, and storage of biological specimens for genetic or molecular | 13 |
| 2 | specimens  |    | analysis in the current trial and for future use in ancillary studies, if applicable                      |    |

---

4 \*It is strongly recommended that this checklist be read in conjunction with the SPIRIT 2013 Explanation & Elaboration for important clarification on the items.  
5 Amendments to the protocol should be tracked and dated. The SPIRIT checklist is copyrighted by the SPIRIT Group under the Creative Commons  
6 [“Attribution-NonCommercial-NoDerivs 3.0 Unported”](#) license.  
7

For peer review only

8  
9  
10  
11  
12  
13  
14  
15  
16  
17  
18  
19  
20  
21  
22  
23  
24  
25  
26  
27  
28  
29  
30  
31  
32  
33  
34  
35  
36  
37  
38  
39  
40  
41  
42  
43  
44  
45  
46



SPIRIT 2013 Checklist: Recommended items to address in a clinical trial protocol and related documents\*

| Section/item                      | Item No | Description                                                                                                                                                                                                                                                                              | Addressed on page number                                   |
|-----------------------------------|---------|------------------------------------------------------------------------------------------------------------------------------------------------------------------------------------------------------------------------------------------------------------------------------------------|------------------------------------------------------------|
| <b>Administrative information</b> |         |                                                                                                                                                                                                                                                                                          |                                                            |
| Title                             | 1       | Descriptive title identifying the study design, population, interventions, and, if applicable, trial acronym                                                                                                                                                                             | 1 _____                                                    |
| Trial registration                | 2a      | Trial identifier and registry name. If not yet registered, name of intended registry                                                                                                                                                                                                     | 1, <u>2</u> , <u>5</u> , <u>7</u>                          |
|                                   | 2b      | All items from the World Health Organization Trial Registration Data Set                                                                                                                                                                                                                 | In trial registration                                      |
| Protocol version                  | 3       | Date and version identifier                                                                                                                                                                                                                                                              | <u>7</u> <del>5</del>                                      |
| Funding                           | 4       | Sources and types of financial, material, and other support                                                                                                                                                                                                                              | 1, <u>2</u> , <u>6</u> , <u>18</u> , <u>5</u> , <u>16</u>  |
| Roles and responsibilities        | 5a      | Names, affiliations, and roles of protocol contributors                                                                                                                                                                                                                                  | 1, <u>6</u> , <u>5</u> , <u>14</u> - <u>16</u> - <u>18</u> |
|                                   | 5b      | Name and contact information for the trial sponsor                                                                                                                                                                                                                                       | 1, <u>6</u> , and trial registration                       |
|                                   | 5c      | Role of study sponsor and funders, if any, in study design; collection, management, analysis, and interpretation of data; writing of the report; and the decision to submit the report for publication, including whether they will have ultimate authority over any of these activities | <u>6</u> - <u>7</u> , <u>18</u> , <u>5</u> , <u>16</u>     |

|    |                                                           |     |                                                                                                                                                                                                                                                                  |                                                 |
|----|-----------------------------------------------------------|-----|------------------------------------------------------------------------------------------------------------------------------------------------------------------------------------------------------------------------------------------------------------------|-------------------------------------------------|
| 1  |                                                           | 5d  | Composition, roles, and responsibilities of the coordinating centre, steering committee, endpoint adjudication committee, data management team, and other individuals or groups overseeing the trial, if applicable (see Item 21a for data monitoring committee) | <a href="#">14-16-18</a>                        |
| 2  |                                                           |     |                                                                                                                                                                                                                                                                  |                                                 |
| 3  |                                                           |     |                                                                                                                                                                                                                                                                  |                                                 |
| 4  |                                                           |     |                                                                                                                                                                                                                                                                  |                                                 |
| 5  |                                                           |     |                                                                                                                                                                                                                                                                  |                                                 |
| 6  |                                                           |     |                                                                                                                                                                                                                                                                  |                                                 |
| 7  |                                                           |     |                                                                                                                                                                                                                                                                  |                                                 |
| 8  |                                                           |     |                                                                                                                                                                                                                                                                  |                                                 |
| 9  |                                                           |     |                                                                                                                                                                                                                                                                  |                                                 |
| 10 | <b>Introduction</b>                                       |     |                                                                                                                                                                                                                                                                  |                                                 |
| 11 |                                                           |     |                                                                                                                                                                                                                                                                  |                                                 |
| 12 | Background and rationale                                  | 6a  | Description of research question and justification for undertaking the trial, including summary of relevant studies (published and unpublished) examining benefits and harms for each intervention                                                               | <a href="#">3-4-5</a>                           |
| 13 |                                                           |     |                                                                                                                                                                                                                                                                  |                                                 |
| 14 |                                                           |     |                                                                                                                                                                                                                                                                  |                                                 |
| 15 |                                                           | 6b  | Explanation for choice of comparators                                                                                                                                                                                                                            | 4                                               |
| 16 | Objectives                                                | 7   | Specific objectives or hypotheses                                                                                                                                                                                                                                | 4                                               |
| 17 |                                                           |     |                                                                                                                                                                                                                                                                  |                                                 |
| 18 | Trial design                                              | 8   | Description of trial design including type of trial (eg, parallel group, crossover, factorial, single group), allocation ratio, and framework (eg, superiority, equivalence, noninferiority, exploratory)                                                        | 4                                               |
| 19 |                                                           |     |                                                                                                                                                                                                                                                                  |                                                 |
| 20 |                                                           |     |                                                                                                                                                                                                                                                                  |                                                 |
| 21 |                                                           |     |                                                                                                                                                                                                                                                                  |                                                 |
| 22 |                                                           |     |                                                                                                                                                                                                                                                                  |                                                 |
| 23 | <b>Methods: Participants, interventions, and outcomes</b> |     |                                                                                                                                                                                                                                                                  |                                                 |
| 24 |                                                           |     |                                                                                                                                                                                                                                                                  |                                                 |
| 25 | Study setting                                             | 9   | Description of study settings (eg, community clinic, academic hospital) and list of countries where data will be collected. Reference to where list of study sites can be obtained                                                                               | <a href="#">6-7-5</a>                           |
| 26 |                                                           |     |                                                                                                                                                                                                                                                                  |                                                 |
| 27 |                                                           |     |                                                                                                                                                                                                                                                                  |                                                 |
| 28 | Eligibility criteria                                      | 10  | Inclusion and exclusion criteria for participants. If applicable, eligibility criteria for study centres and individuals who will perform the interventions (eg, surgeons, psychotherapists)                                                                     | <a href="#">6-7-9</a> (Box <a href="#">21</a> ) |
| 29 |                                                           |     |                                                                                                                                                                                                                                                                  |                                                 |
| 30 |                                                           |     |                                                                                                                                                                                                                                                                  |                                                 |
| 31 | Interventions                                             | 11a | Interventions for each group with sufficient detail to allow replication, including how and when they will be administered                                                                                                                                       | <a href="#">97</a>                              |
| 32 |                                                           |     |                                                                                                                                                                                                                                                                  |                                                 |
| 33 |                                                           |     |                                                                                                                                                                                                                                                                  |                                                 |
| 34 |                                                           | 11b | Criteria for discontinuing or modifying allocated interventions for a given trial participant (eg, drug dose change in response to harms, participant request, or improving/worsening disease)                                                                   | <a href="#">6-7-9</a> (Box <a href="#">21</a> ) |
| 35 |                                                           |     |                                                                                                                                                                                                                                                                  |                                                 |
| 36 |                                                           |     |                                                                                                                                                                                                                                                                  |                                                 |
| 37 |                                                           | 11c | Strategies to improve adherence to intervention protocols, and any procedures for monitoring adherence (eg, drug tablet return, laboratory tests)                                                                                                                | <a href="#">9, 147, 13</a>                      |
| 38 |                                                           |     |                                                                                                                                                                                                                                                                  |                                                 |
| 39 |                                                           |     |                                                                                                                                                                                                                                                                  |                                                 |
| 40 |                                                           | 11d | Relevant concomitant care and interventions that are permitted or prohibited during the trial                                                                                                                                                                    | <a href="#">6-7-9</a> (Box <a href="#">21</a> ) |
| 41 |                                                           |     |                                                                                                                                                                                                                                                                  |                                                 |
| 42 |                                                           |     |                                                                                                                                                                                                                                                                  |                                                 |
| 43 |                                                           |     |                                                                                                                                                                                                                                                                  |                                                 |
| 44 |                                                           |     |                                                                                                                                                                                                                                                                  |                                                 |
| 45 |                                                           |     |                                                                                                                                                                                                                                                                  |                                                 |
| 46 |                                                           |     |                                                                                                                                                                                                                                                                  |                                                 |

|    |                      |    |                                                                                                                                                                                                                                                                                                                                                                                |                                                            |
|----|----------------------|----|--------------------------------------------------------------------------------------------------------------------------------------------------------------------------------------------------------------------------------------------------------------------------------------------------------------------------------------------------------------------------------|------------------------------------------------------------|
| 1  | Outcomes             | 12 | Primary, secondary, and other outcomes, including the specific measurement variable (eg, systolic blood pressure), analysis metric (eg, change from baseline, final value, time to event), method of aggregation (eg, median, proportion), and time point for each outcome. Explanation of the clinical relevance of chosen efficacy and harm outcomes is strongly recommended | <a href="#">4-6 (Box 1)</a> , <sup>17</sup> trial registry |
| 2  |                      |    |                                                                                                                                                                                                                                                                                                                                                                                |                                                            |
| 3  |                      |    |                                                                                                                                                                                                                                                                                                                                                                                |                                                            |
| 4  |                      |    |                                                                                                                                                                                                                                                                                                                                                                                |                                                            |
| 5  |                      |    |                                                                                                                                                                                                                                                                                                                                                                                |                                                            |
| 6  | Participant timeline | 13 | Time schedule of enrolment, interventions (including any run-ins and washouts), assessments, and visits for participants. A schematic diagram is highly recommended (see Figure)                                                                                                                                                                                               | Table 1; Figures 1-2                                       |
| 7  |                      |    |                                                                                                                                                                                                                                                                                                                                                                                |                                                            |
| 8  |                      |    |                                                                                                                                                                                                                                                                                                                                                                                |                                                            |
| 9  | Sample size          | 14 | Estimated number of participants needed to achieve study objectives and how it was determined, including clinical and statistical assumptions supporting any sample size calculations                                                                                                                                                                                          | <a href="#">97</a>                                         |
| 10 |                      |    |                                                                                                                                                                                                                                                                                                                                                                                |                                                            |
| 11 |                      |    |                                                                                                                                                                                                                                                                                                                                                                                |                                                            |
| 12 |                      |    |                                                                                                                                                                                                                                                                                                                                                                                |                                                            |
| 13 | Recruitment          | 15 | Strategies for achieving adequate participant enrolment to reach target sample size                                                                                                                                                                                                                                                                                            | <a href="#">97</a>                                         |
| 14 |                      |    |                                                                                                                                                                                                                                                                                                                                                                                |                                                            |
| 15 |                      |    |                                                                                                                                                                                                                                                                                                                                                                                |                                                            |

### Methods: Assignment of interventions (for controlled trials)

#### Allocation:

|    |                                  |     |                                                                                                                                                                                                                                                                                                                                                          |                               |
|----|----------------------------------|-----|----------------------------------------------------------------------------------------------------------------------------------------------------------------------------------------------------------------------------------------------------------------------------------------------------------------------------------------------------------|-------------------------------|
| 19 | Sequence generation              | 16a | Method of generating the allocation sequence (eg, computer-generated random numbers), and list of any factors for stratification. To reduce predictability of a random sequence, details of any planned restriction (eg, blocking) should be provided in a separate document that is unavailable to those who enrol participants or assign interventions | <a href="#">10-118</a>        |
| 20 |                                  |     |                                                                                                                                                                                                                                                                                                                                                          |                               |
| 21 |                                  |     |                                                                                                                                                                                                                                                                                                                                                          |                               |
| 22 |                                  |     |                                                                                                                                                                                                                                                                                                                                                          |                               |
| 23 |                                  |     |                                                                                                                                                                                                                                                                                                                                                          |                               |
| 24 |                                  |     |                                                                                                                                                                                                                                                                                                                                                          |                               |
| 25 | Allocation concealment mechanism | 16b | Mechanism of implementing the allocation sequence (eg, central telephone; sequentially numbered, opaque, sealed envelopes), describing any steps to conceal the sequence until interventions are assigned                                                                                                                                                | <a href="#">10-118</a>        |
| 26 |                                  |     |                                                                                                                                                                                                                                                                                                                                                          |                               |
| 27 |                                  |     |                                                                                                                                                                                                                                                                                                                                                          |                               |
| 28 |                                  |     |                                                                                                                                                                                                                                                                                                                                                          |                               |
| 29 | Implementation                   | 16c | Who will generate the allocation sequence, who will enrol participants, and who will assign participants to interventions                                                                                                                                                                                                                                | <a href="#">10-118</a>        |
| 30 |                                  |     |                                                                                                                                                                                                                                                                                                                                                          |                               |
| 31 |                                  |     |                                                                                                                                                                                                                                                                                                                                                          |                               |
| 32 |                                  |     |                                                                                                                                                                                                                                                                                                                                                          |                               |
| 33 | Blinding (masking)               | 17a | Who will be blinded after assignment to interventions (eg, trial participants, care providers, outcome assessors, data analysts), and how                                                                                                                                                                                                                | <a href="#">10-11, 17-188</a> |
| 34 |                                  |     |                                                                                                                                                                                                                                                                                                                                                          |                               |
| 35 |                                  |     |                                                                                                                                                                                                                                                                                                                                                          |                               |
| 36 |                                  | 17b | If blinded, circumstances under which unblinding is permissible, and procedure for revealing a participant's allocated intervention during the trial                                                                                                                                                                                                     | <a href="#">108</a>           |
| 37 |                                  |     |                                                                                                                                                                                                                                                                                                                                                          |                               |
| 38 |                                  |     |                                                                                                                                                                                                                                                                                                                                                          |                               |
| 39 |                                  |     |                                                                                                                                                                                                                                                                                                                                                          |                               |

### Methods: Data collection, management, and analysis

|    |                                 |     |                                                                                                                                                                                                                                                                                                                                                                                                              |                            |  |
|----|---------------------------------|-----|--------------------------------------------------------------------------------------------------------------------------------------------------------------------------------------------------------------------------------------------------------------------------------------------------------------------------------------------------------------------------------------------------------------|----------------------------|--|
| 1  | Data collection methods         | 18a | Plans for assessment and collection of outcome, baseline, and other trial data, including any related processes to promote data quality (eg, duplicate measurements, training of assessors) and a description of study instruments (eg, questionnaires, laboratory tests) along with their reliability and validity, if known. Reference to where data collection forms can be found, if not in the protocol | <a href="#">10-169-13</a>  |  |
| 2  |                                 |     |                                                                                                                                                                                                                                                                                                                                                                                                              |                            |  |
| 3  |                                 |     |                                                                                                                                                                                                                                                                                                                                                                                                              |                            |  |
| 4  |                                 |     |                                                                                                                                                                                                                                                                                                                                                                                                              |                            |  |
| 5  |                                 |     |                                                                                                                                                                                                                                                                                                                                                                                                              |                            |  |
| 6  |                                 | 18b | Plans to promote participant retention and complete follow-up, including list of any outcome data to be collected for participants who discontinue or deviate from intervention protocols                                                                                                                                                                                                                    | <a href="#">10, 157</a>    |  |
| 7  |                                 |     |                                                                                                                                                                                                                                                                                                                                                                                                              |                            |  |
| 8  | Data management                 | 19  | Plans for data entry, coding, security, and storage, including any related processes to promote data quality (eg, double data entry; range checks for data values). Reference to where details of data management procedures can be found, if not in the protocol                                                                                                                                            | <a href="#">16-1713-14</a> |  |
| 9  |                                 |     |                                                                                                                                                                                                                                                                                                                                                                                                              |                            |  |
| 10 |                                 |     |                                                                                                                                                                                                                                                                                                                                                                                                              |                            |  |
| 11 | Statistical methods             | 20a | Statistical methods for analysing primary and secondary outcomes. Reference to where other details of the statistical analysis plan can be found, if not in the protocol                                                                                                                                                                                                                                     | <a href="#">1814</a>       |  |
| 12 |                                 |     |                                                                                                                                                                                                                                                                                                                                                                                                              |                            |  |
| 13 |                                 |     |                                                                                                                                                                                                                                                                                                                                                                                                              |                            |  |
| 14 |                                 |     |                                                                                                                                                                                                                                                                                                                                                                                                              |                            |  |
| 15 |                                 | 20b | Methods for any additional analyses (eg, subgroup and adjusted analyses)                                                                                                                                                                                                                                                                                                                                     | <a href="#">1814</a>       |  |
| 16 |                                 |     |                                                                                                                                                                                                                                                                                                                                                                                                              |                            |  |
| 17 |                                 | 20c | Definition of analysis population relating to protocol non-adherence (eg, as randomised analysis), and any statistical methods to handle missing data (eg, multiple imputation)                                                                                                                                                                                                                              | <a href="#">1814</a>       |  |
| 18 |                                 |     |                                                                                                                                                                                                                                                                                                                                                                                                              |                            |  |
| 19 |                                 |     |                                                                                                                                                                                                                                                                                                                                                                                                              |                            |  |
| 20 |                                 |     |                                                                                                                                                                                                                                                                                                                                                                                                              |                            |  |
| 21 |                                 |     |                                                                                                                                                                                                                                                                                                                                                                                                              |                            |  |
| 22 |                                 |     |                                                                                                                                                                                                                                                                                                                                                                                                              |                            |  |
| 23 | <b>Methods: Monitoring</b>      |     |                                                                                                                                                                                                                                                                                                                                                                                                              |                            |  |
| 24 |                                 |     |                                                                                                                                                                                                                                                                                                                                                                                                              |                            |  |
| 25 | Data monitoring                 | 21a | Composition of data monitoring committee (DMC); summary of its role and reporting structure; statement of whether it is independent from the sponsor and competing interests; and reference to where further details about its charter can be found, if not in the protocol. Alternatively, an explanation of why a DMC is not needed                                                                        | <a href="#">15-1813-14</a> |  |
| 26 |                                 |     |                                                                                                                                                                                                                                                                                                                                                                                                              |                            |  |
| 27 |                                 | 21b | Description of any interim analyses and stopping guidelines, including who will have access to these interim results and make the final decision to terminate the trial                                                                                                                                                                                                                                      | <a href="#">1713-14</a>    |  |
| 28 |                                 |     |                                                                                                                                                                                                                                                                                                                                                                                                              |                            |  |
| 29 |                                 |     |                                                                                                                                                                                                                                                                                                                                                                                                              |                            |  |
| 30 |                                 |     |                                                                                                                                                                                                                                                                                                                                                                                                              |                            |  |
| 31 | Harms                           | 22  | Plans for collecting, assessing, reporting, and managing solicited and spontaneously reported adverse events and other unintended effects of trial interventions or trial conduct                                                                                                                                                                                                                            | <a href="#">1513-14</a>    |  |
| 32 |                                 |     |                                                                                                                                                                                                                                                                                                                                                                                                              |                            |  |
| 33 |                                 |     |                                                                                                                                                                                                                                                                                                                                                                                                              |                            |  |
| 34 | Auditing                        | 23  | Frequency and procedures for auditing trial conduct, if any, and whether the process will be independent from investigators and the sponsor                                                                                                                                                                                                                                                                  | <a href="#">1613-14</a>    |  |
| 35 |                                 |     |                                                                                                                                                                                                                                                                                                                                                                                                              |                            |  |
| 36 |                                 |     |                                                                                                                                                                                                                                                                                                                                                                                                              |                            |  |
| 37 |                                 |     |                                                                                                                                                                                                                                                                                                                                                                                                              |                            |  |
| 38 |                                 |     |                                                                                                                                                                                                                                                                                                                                                                                                              |                            |  |
| 39 |                                 |     |                                                                                                                                                                                                                                                                                                                                                                                                              |                            |  |
| 40 |                                 |     |                                                                                                                                                                                                                                                                                                                                                                                                              |                            |  |
| 41 | <b>Ethics and dissemination</b> |     |                                                                                                                                                                                                                                                                                                                                                                                                              |                            |  |
| 42 |                                 |     |                                                                                                                                                                                                                                                                                                                                                                                                              |                            |  |
| 43 |                                 |     |                                                                                                                                                                                                                                                                                                                                                                                                              |                            |  |
| 44 |                                 |     |                                                                                                                                                                                                                                                                                                                                                                                                              |                            |  |
| 45 |                                 |     |                                                                                                                                                                                                                                                                                                                                                                                                              |                            |  |
| 46 |                                 |     |                                                                                                                                                                                                                                                                                                                                                                                                              |                            |  |

|    |                               |     |                                                                                                                                                                                                                                                                                     |                                  |
|----|-------------------------------|-----|-------------------------------------------------------------------------------------------------------------------------------------------------------------------------------------------------------------------------------------------------------------------------------------|----------------------------------|
| 1  | Research ethics approval      | 24  | Plans for seeking research ethics committee/institutional review board (REC/IRB) approval                                                                                                                                                                                           | 1, 2, <del>7</del> , <u>175</u>  |
| 2  |                               |     |                                                                                                                                                                                                                                                                                     |                                  |
| 3  |                               |     |                                                                                                                                                                                                                                                                                     |                                  |
| 4  | Protocol amendments           | 25  | Plans for communicating important protocol modifications (eg, changes to eligibility criteria, outcomes, analyses) to relevant parties (eg, investigators, REC/IRBs, trial participants, trial registries, journals, regulators)                                                    | <u>75</u>                        |
| 5  |                               |     |                                                                                                                                                                                                                                                                                     |                                  |
| 6  |                               |     |                                                                                                                                                                                                                                                                                     |                                  |
| 7  |                               |     |                                                                                                                                                                                                                                                                                     |                                  |
| 8  | Consent or assent             | 26a | Who will obtain informed consent or assent from potential trial participants or authorised surrogates, and how (see Item 32)                                                                                                                                                        | <u>9-107-8</u>                   |
| 9  |                               |     |                                                                                                                                                                                                                                                                                     |                                  |
| 10 |                               |     |                                                                                                                                                                                                                                                                                     |                                  |
| 11 |                               | 26b | Additional consent provisions for collection and use of participant data and biological specimens in ancillary studies, if applicable                                                                                                                                               | N/A                              |
| 12 |                               |     |                                                                                                                                                                                                                                                                                     |                                  |
| 13 |                               |     |                                                                                                                                                                                                                                                                                     |                                  |
| 14 | Confidentiality               | 27  | How personal information about potential and enrolled participants will be collected, shared, and maintained in order to protect confidentiality before, during, and after the trial                                                                                                | <u>15-16</u><br><del>13-14</del> |
| 15 |                               |     |                                                                                                                                                                                                                                                                                     |                                  |
| 16 |                               |     |                                                                                                                                                                                                                                                                                     |                                  |
| 17 |                               |     |                                                                                                                                                                                                                                                                                     |                                  |
| 18 | Declaration of interests      | 28  | Financial and other competing interests for principal investigators for the overall trial and each study site                                                                                                                                                                       | <u>184,16</u>                    |
| 19 |                               |     |                                                                                                                                                                                                                                                                                     |                                  |
| 20 |                               |     |                                                                                                                                                                                                                                                                                     |                                  |
| 21 | Access to data                | 29  | Statement of who will have access to the final trial dataset, and disclosure of contractual agreements that limit such access for investigators                                                                                                                                     | <u>1, 10, 16-1813</u>            |
| 22 |                               |     |                                                                                                                                                                                                                                                                                     |                                  |
| 23 |                               |     |                                                                                                                                                                                                                                                                                     |                                  |
| 24 | Ancillary and post-trial care | 30  | Provisions, if any, for ancillary and post-trial care, and for compensation to those who suffer harm from trial participation                                                                                                                                                       | 13                               |
| 25 |                               |     |                                                                                                                                                                                                                                                                                     |                                  |
| 26 |                               |     |                                                                                                                                                                                                                                                                                     |                                  |
| 27 | Dissemination policy          | 31a | Plans for investigators and sponsor to communicate trial results to participants, healthcare professionals, the public, and other relevant groups (eg, via publication, reporting in results databases, or other data sharing arrangements), including any publication restrictions | <u>1, 2, 1714</u>                |
| 28 |                               |     |                                                                                                                                                                                                                                                                                     |                                  |
| 29 |                               |     |                                                                                                                                                                                                                                                                                     |                                  |
| 30 |                               |     |                                                                                                                                                                                                                                                                                     |                                  |
| 31 |                               |     |                                                                                                                                                                                                                                                                                     |                                  |
| 32 |                               | 31b | Authorship eligibility guidelines and any intended use of professional writers                                                                                                                                                                                                      | <u>1716</u>                      |
| 33 |                               |     |                                                                                                                                                                                                                                                                                     |                                  |
| 34 |                               | 31c | Plans, if any, for granting public access to the full protocol, participant-level dataset, and statistical code                                                                                                                                                                     | <u>1816</u> ; trial registry     |
| 35 |                               |     |                                                                                                                                                                                                                                                                                     |                                  |
| 36 |                               |     |                                                                                                                                                                                                                                                                                     |                                  |
| 37 | <b>Appendices</b>             |     |                                                                                                                                                                                                                                                                                     |                                  |
| 38 | Informed consent materials    | 32  | Model consent form and other related documentation given to participants and authorised surrogates                                                                                                                                                                                  | Supplementary material           |
| 39 |                               |     |                                                                                                                                                                                                                                                                                     |                                  |
| 40 |                               |     |                                                                                                                                                                                                                                                                                     |                                  |
| 41 |                               |     |                                                                                                                                                                                                                                                                                     |                                  |
| 42 |                               |     |                                                                                                                                                                                                                                                                                     |                                  |
| 43 |                               |     |                                                                                                                                                                                                                                                                                     |                                  |
| 44 |                               |     |                                                                                                                                                                                                                                                                                     |                                  |
| 45 |                               |     |                                                                                                                                                                                                                                                                                     |                                  |
| 46 |                               |     |                                                                                                                                                                                                                                                                                     |                                  |



1  
2  
3  
4  
5  
6  
7  
8  
9  
10  
11  
12  
13  
14  
15  
16  
17  
18  
19  
20  
21  
22  
23  
24  
25  
26  
27  
28  
29  
30  
31  
32  
33  
34  
35  
36  
37  
38  
39  
40  
41  
42  
43  
44  
45  
46

|                      |    |                                                                                                                                                                                                |             |
|----------------------|----|------------------------------------------------------------------------------------------------------------------------------------------------------------------------------------------------|-------------|
| Biological specimens | 33 | Plans for collection, laboratory evaluation, and storage of biological specimens for genetic or molecular analysis in the current trial and for future use in ancillary studies, if applicable | <u>1344</u> |
|----------------------|----|------------------------------------------------------------------------------------------------------------------------------------------------------------------------------------------------|-------------|

---

\*It is strongly recommended that this checklist be read in conjunction with the SPIRIT 2013 Explanation & Elaboration for important clarification on the items. Amendments to the protocol should be tracked and dated. The SPIRIT checklist is copyrighted by the SPIRIT Group under the Creative Commons [“Attribution-NonCommercial-NoDerivs 3.0 Unported”](#) license.

For peer review only
